# Supplementary material
Source: MDPI journal article supplement (https://www.mdpi.com/1424-8247/14/12/1290)
Supplement: s1 [file s1]

# Supporting information

## Discovery of a Novel Template, 7-Substituted 7-Deaza-4'-thioadenosine Derivatives as Multi-kinase Inhibitors

Karishma K. Mashelkar<sup>1</sup>, Woong Sub Byun<sup>1</sup>, Hyejin Ko<sup>1</sup>, Kisu Sung<sup>1</sup>, Sushil K. Tripathi<sup>1</sup>, Seungchan An<sup>1</sup>, Yun A Yum<sup>1</sup>, Jee Youn Kwon<sup>1</sup>, Minjae Kim<sup>1</sup>, Gibae Kim<sup>1</sup>, Eun-Ji Kwon,<sup>1</sup> Hyuk Woo Lee<sup>2</sup>, Minsoo Noh<sup>1</sup>, Sang Kook Lee<sup>1</sup>, and Lak Shin Jeong<sup>1,\*</sup>

<sup>1</sup>*Research Institute of Pharmaceutical Sciences, College of Pharmacy, Seoul National University, Seoul 08826, Korea and* <sup>2</sup>*Future Medicine Co., Ltd, Seongnam, Gyeonggi-do, Korea,*

\* To whom correspondence should be addressed.

E-mail: lakjeong@snu.ac.kr

### Contents

|                                                                                            |                |
|--------------------------------------------------------------------------------------------|----------------|
| <b><sup>1</sup>H and <sup>13</sup>C NMR Spectra.....</b>                                   | <b>S02-S59</b> |
| <b>HRMS (ESI-Q-TOF) data for compound 1g.....</b>                                          | <b>S60</b>     |
| <b>X-ray Crystallographic data for compound 1g.....</b>                                    | <b>S61-S63</b> |
| <b>HPLC Chromatograms.....</b>                                                             | <b>S64-S74</b> |
| <b>Kinome scan data of compound 1g.....</b>                                                | <b>S75-S78</b> |
| <b>Kinase inhibition profile of 1a-k against TRKA, CK1δ, and DYRK1A/1B (Table S2).....</b> | <b>S79</b>     |

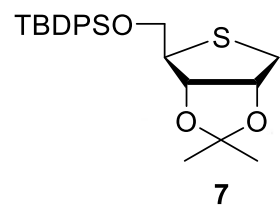

$^1\text{H}$  NMR (500 MHz,  $\text{CDCl}_3$ )

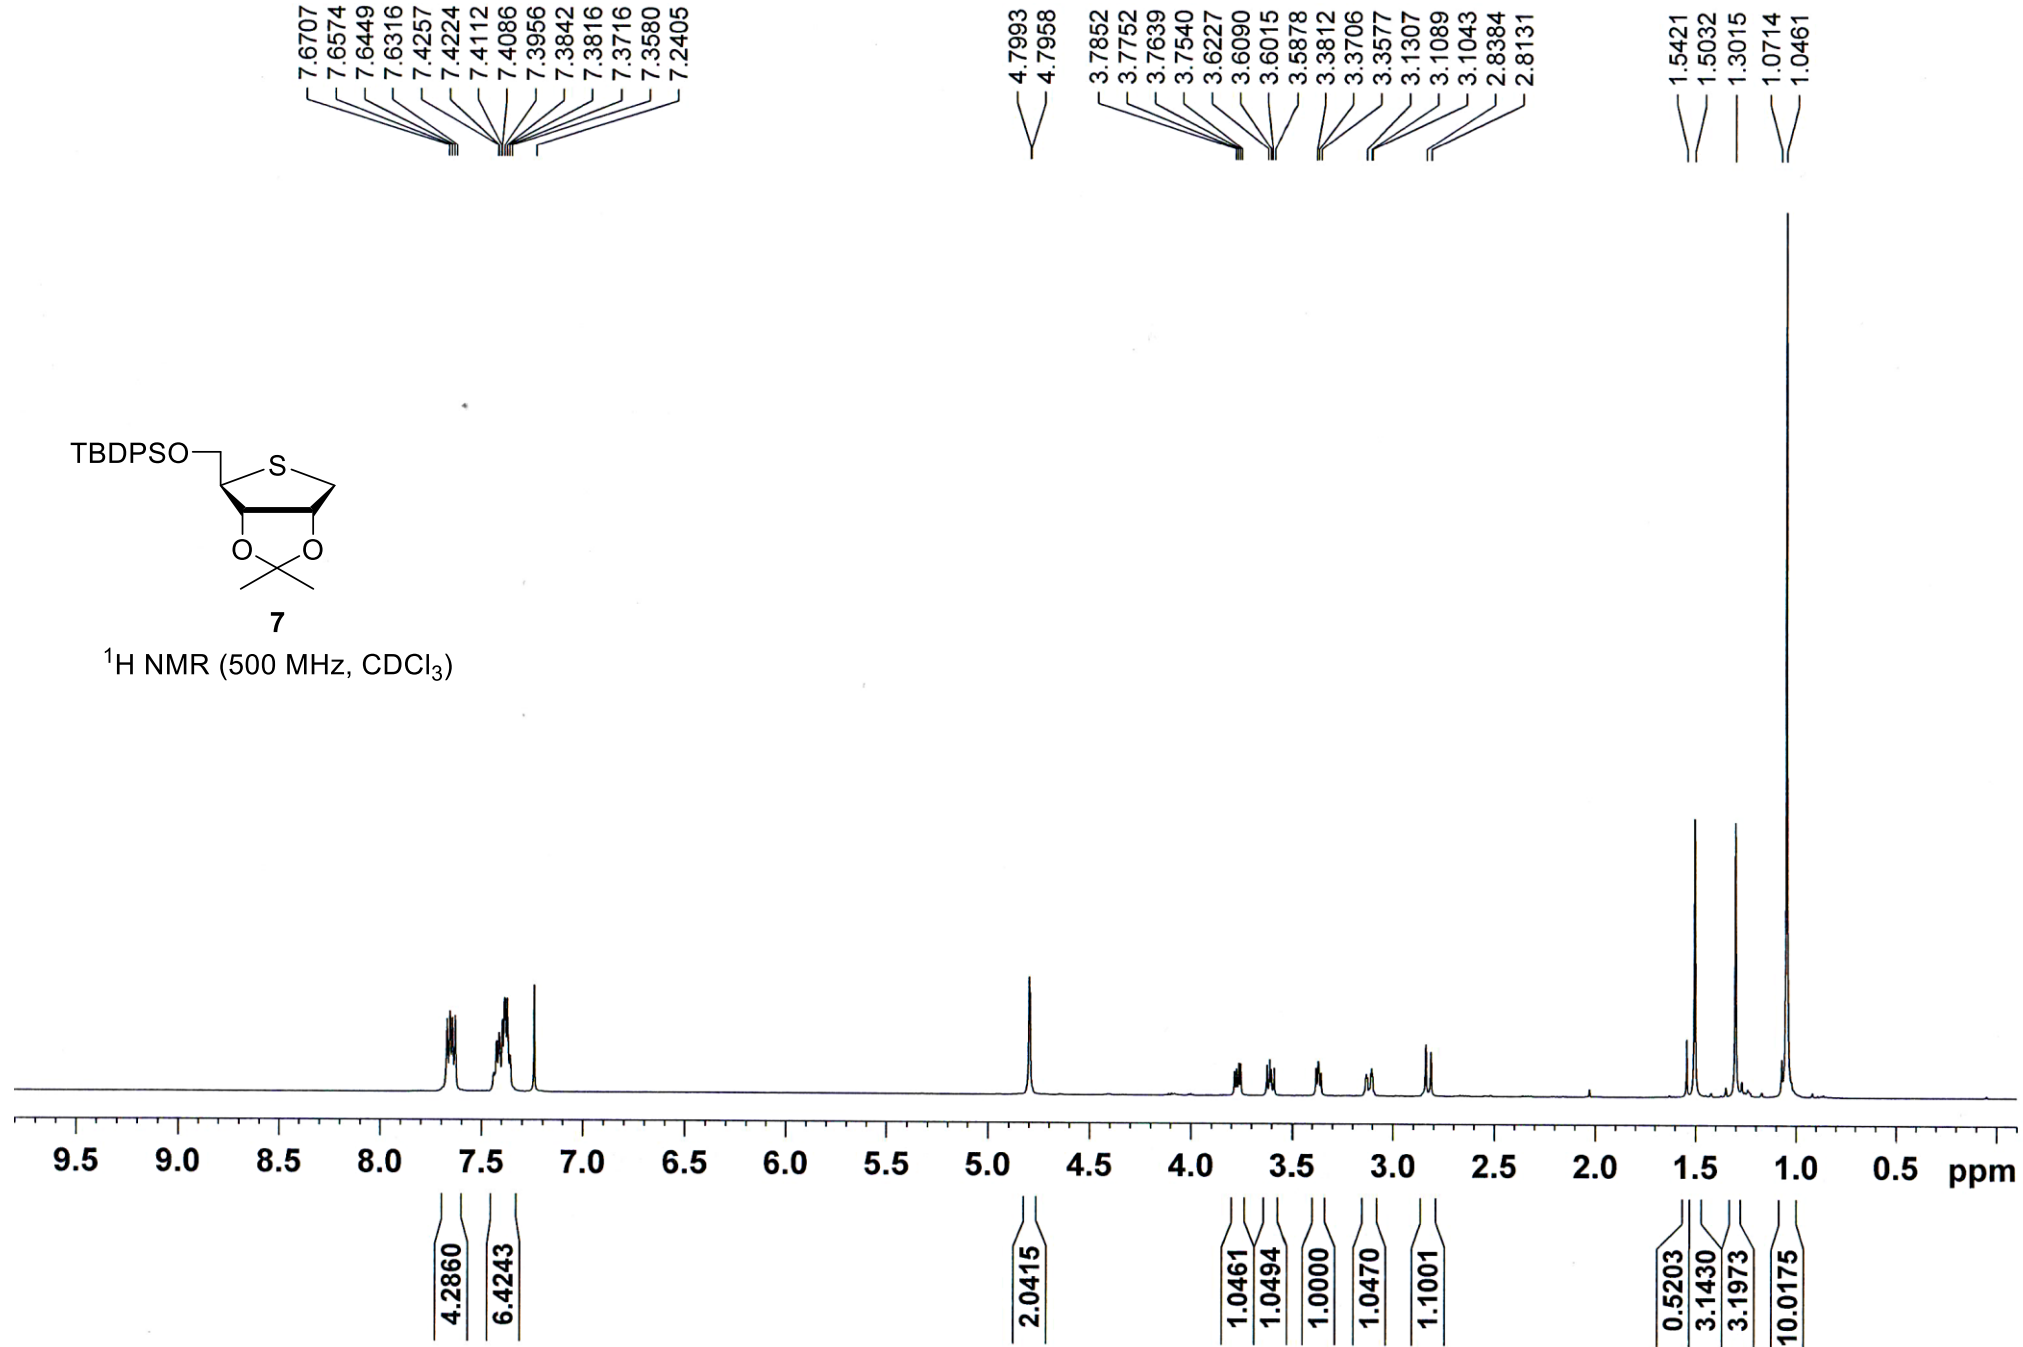

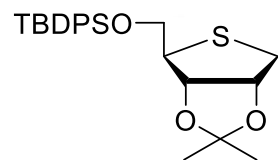

**7**

$^{13}\text{C}$  NMR (125 MHz,  $\text{CDCl}_3$ )

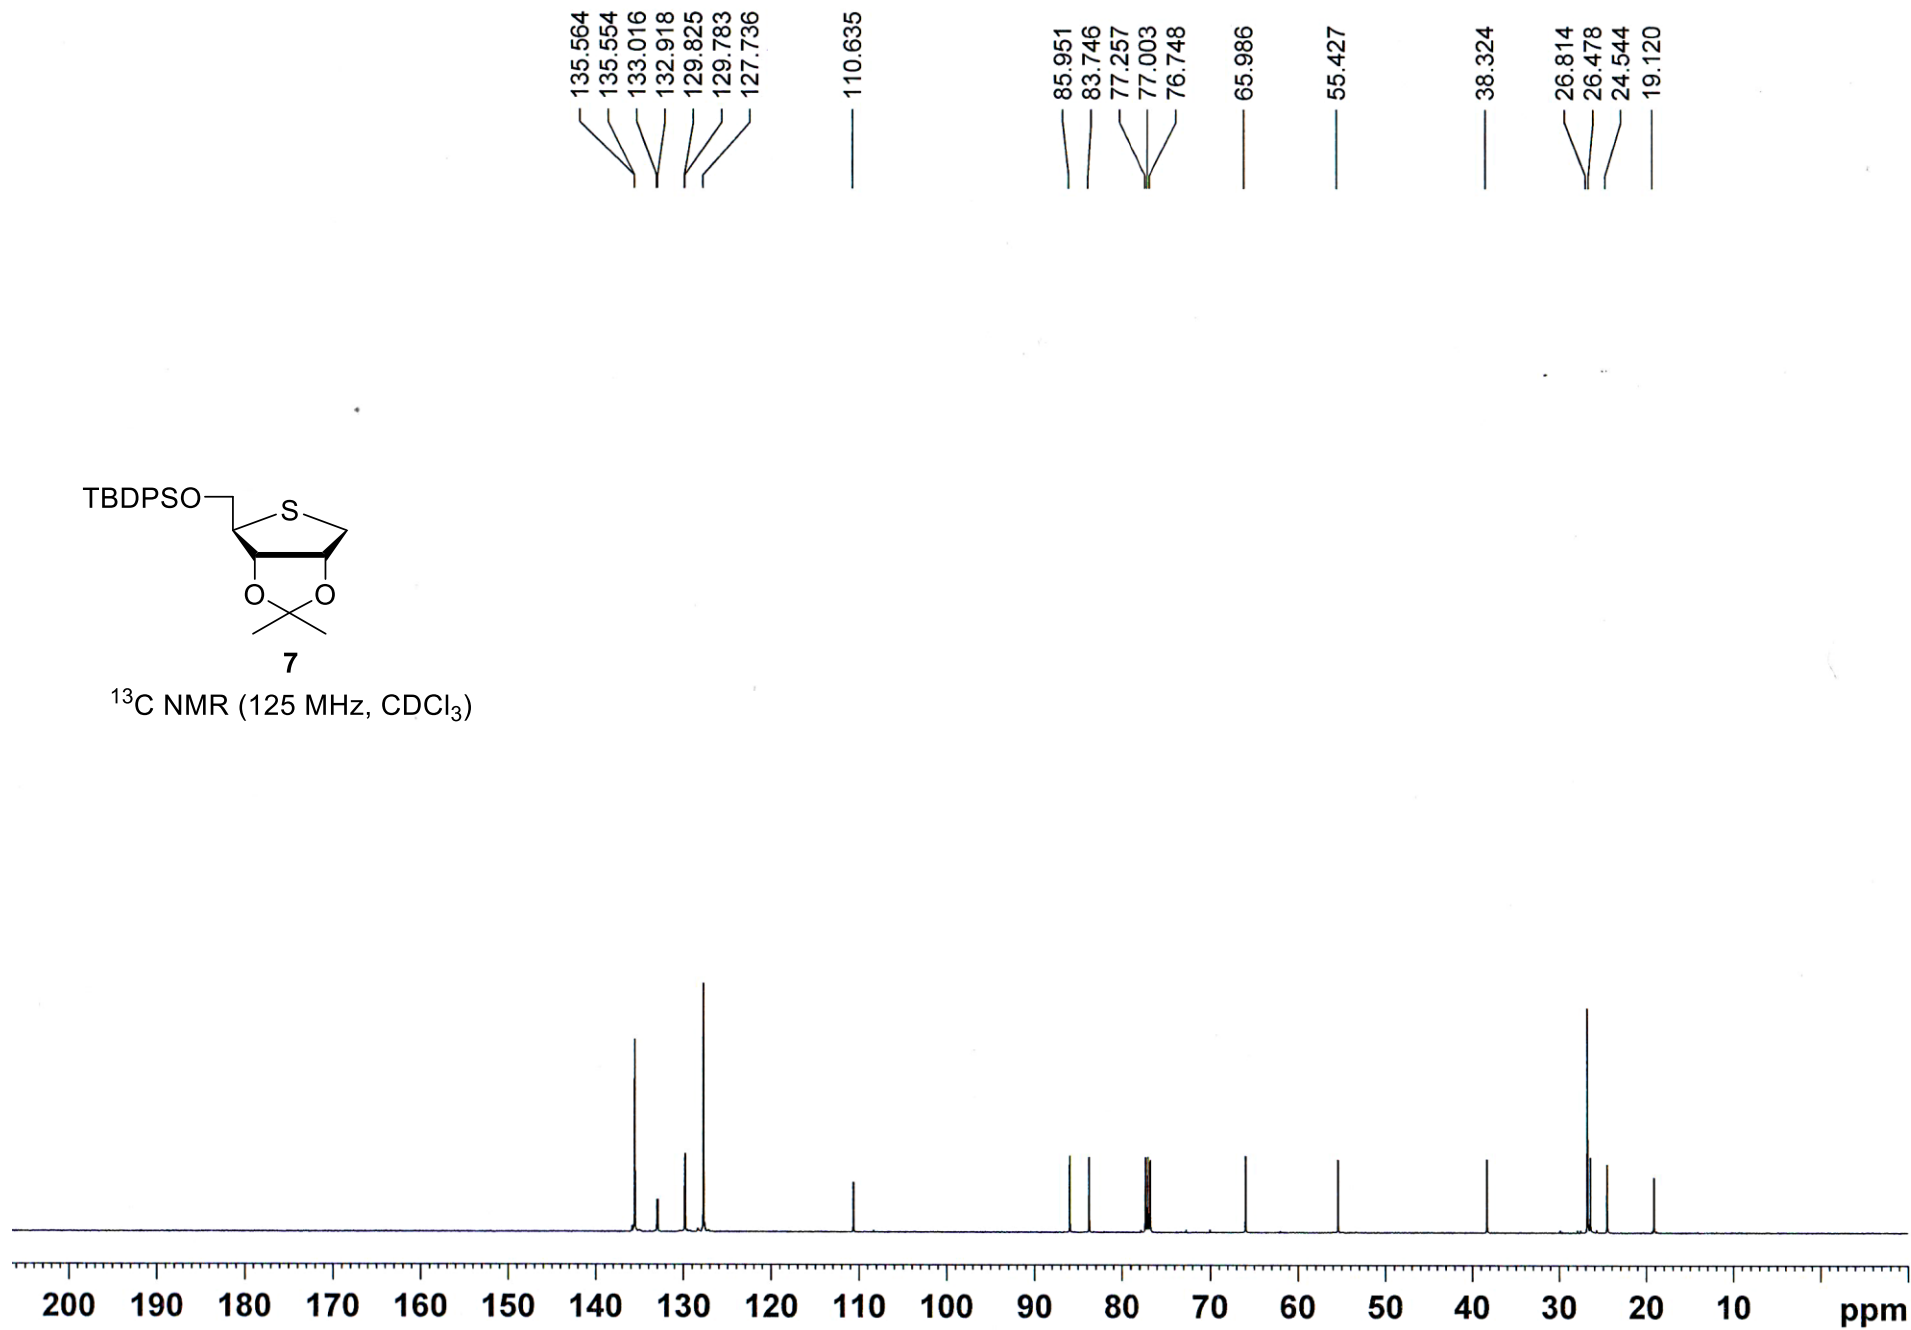

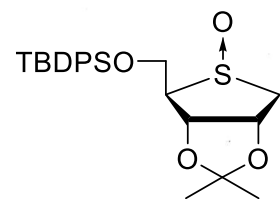

**8**

$^1\text{H}$  NMR (500 MHz,  $\text{CDCl}_3$ )

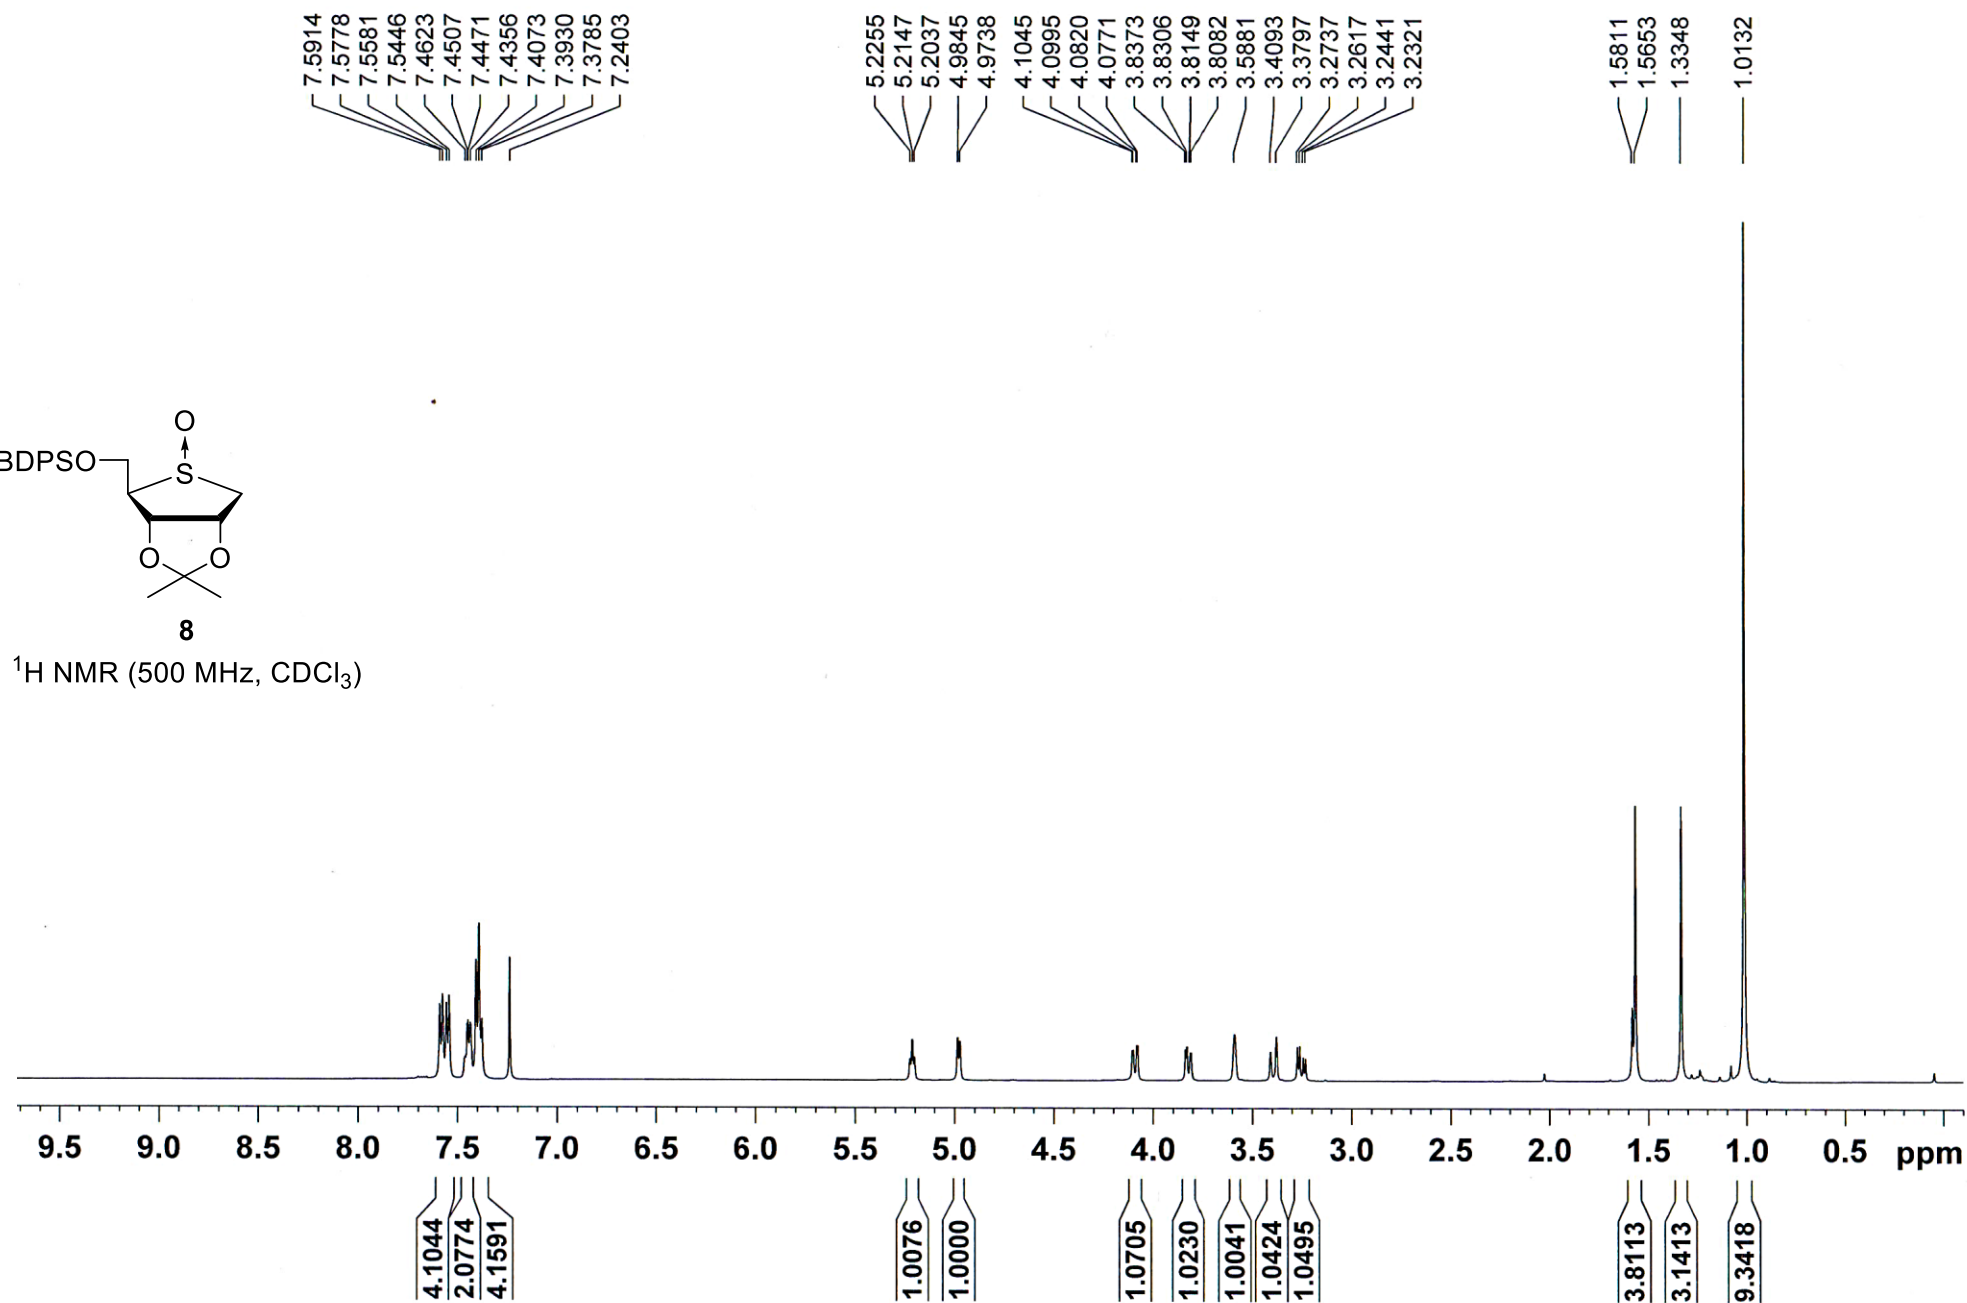



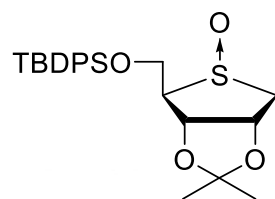

**8**

$^{13}\text{C}$  NMR (125 MHz,  $\text{CDCl}_3$ )

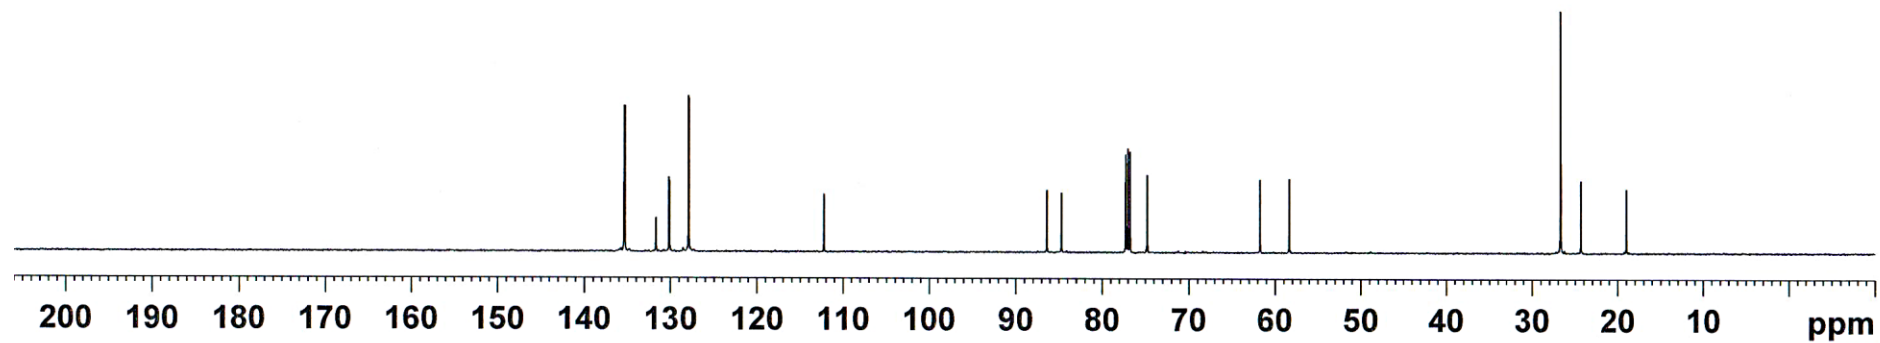

135.414  
135.322  
131.712  
131.650  
130.171  
130.096  
127.931  
127.899  
112.243

86.375  
84.701  
77.259  
77.005  
76.750  
74.775

61.723  
58.345

26.731  
26.682  
24.329  
18.990

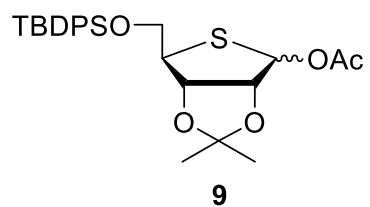

$^1\text{H}$  NMR (500 MHz,  $\text{CDCl}_3$ )

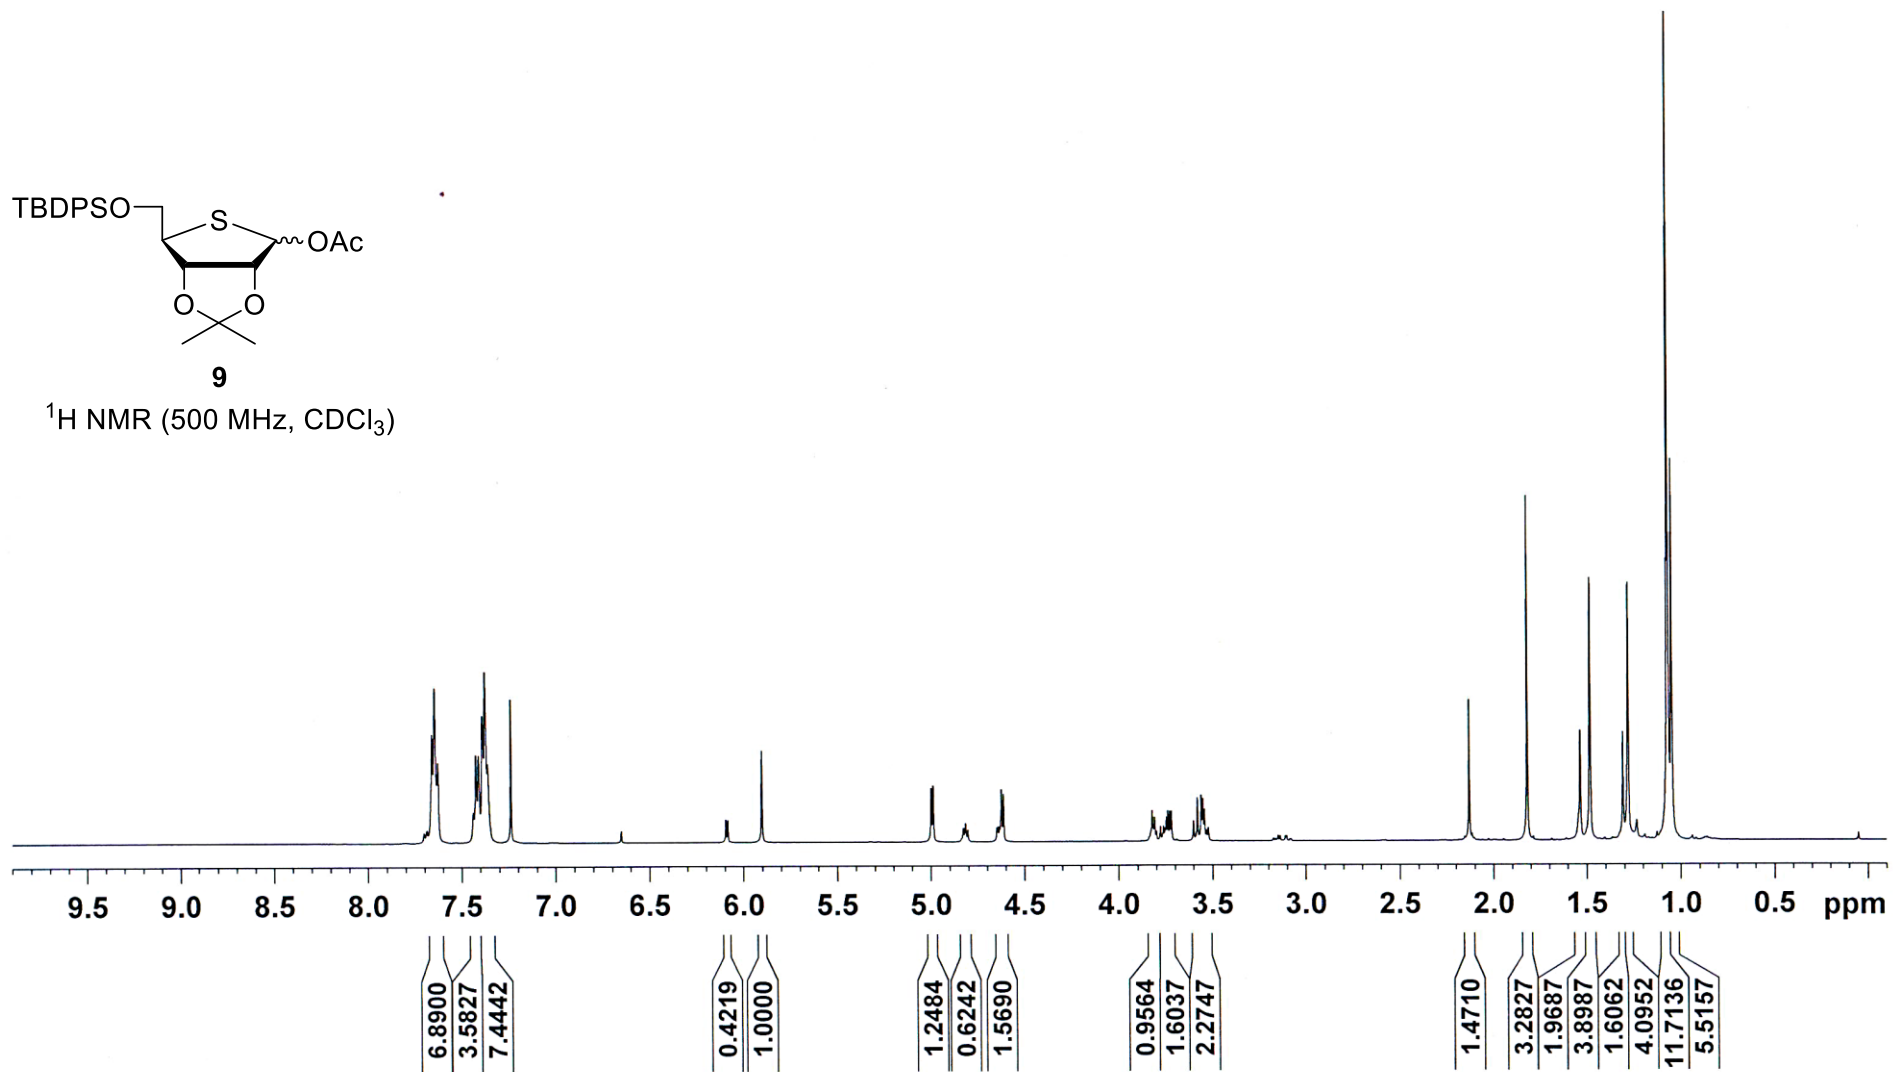

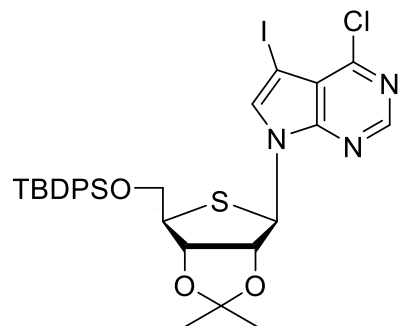

**10**

$^1\text{H}$  NMR (500 MHz,  $\text{CD}_3\text{OD}$ )

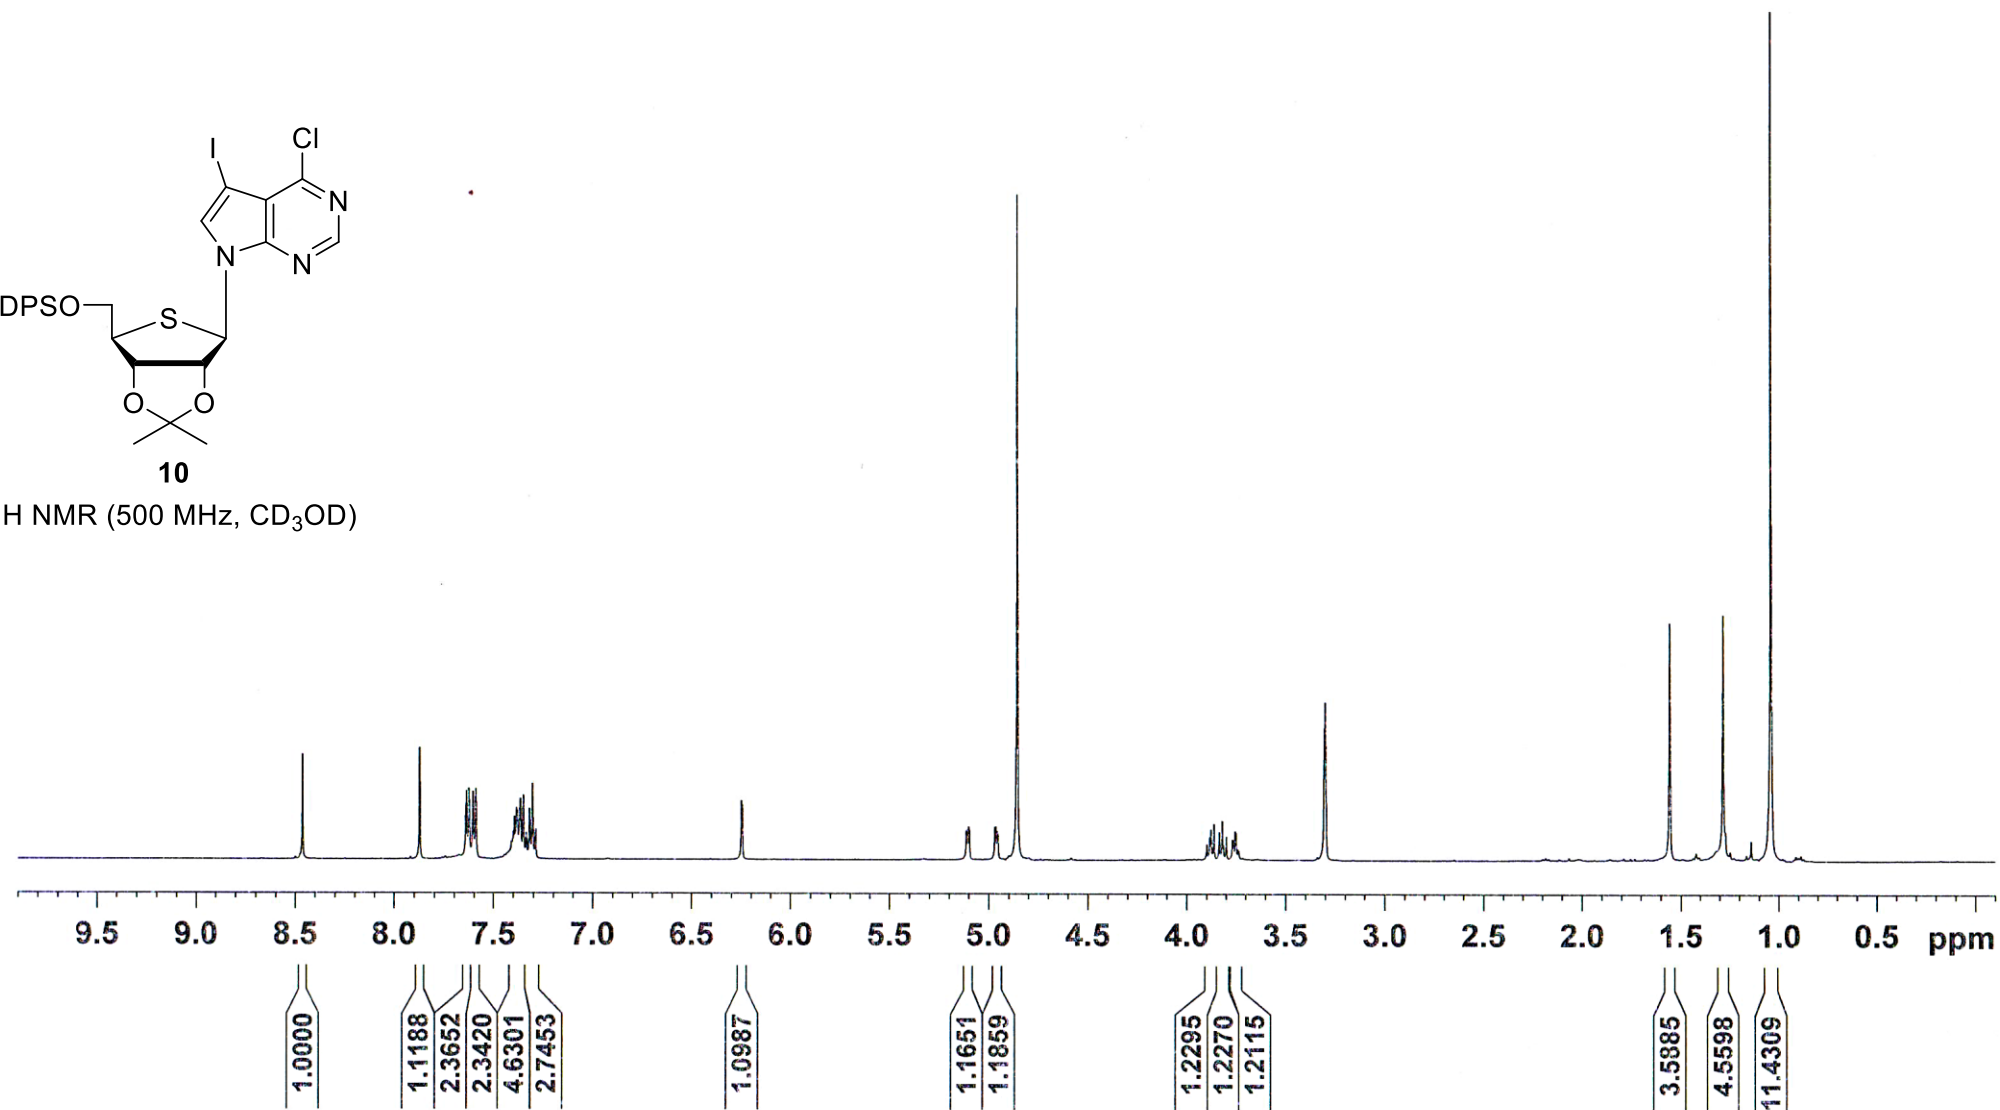

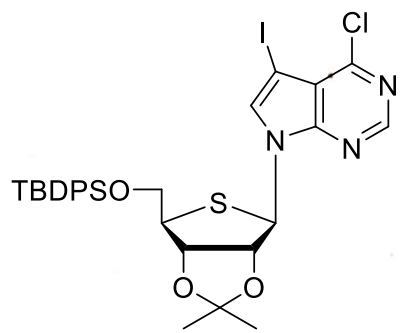

**10**

$^{13}\text{C}$  NMR (100 MHz,  $\text{CD}_3\text{OD}$ )

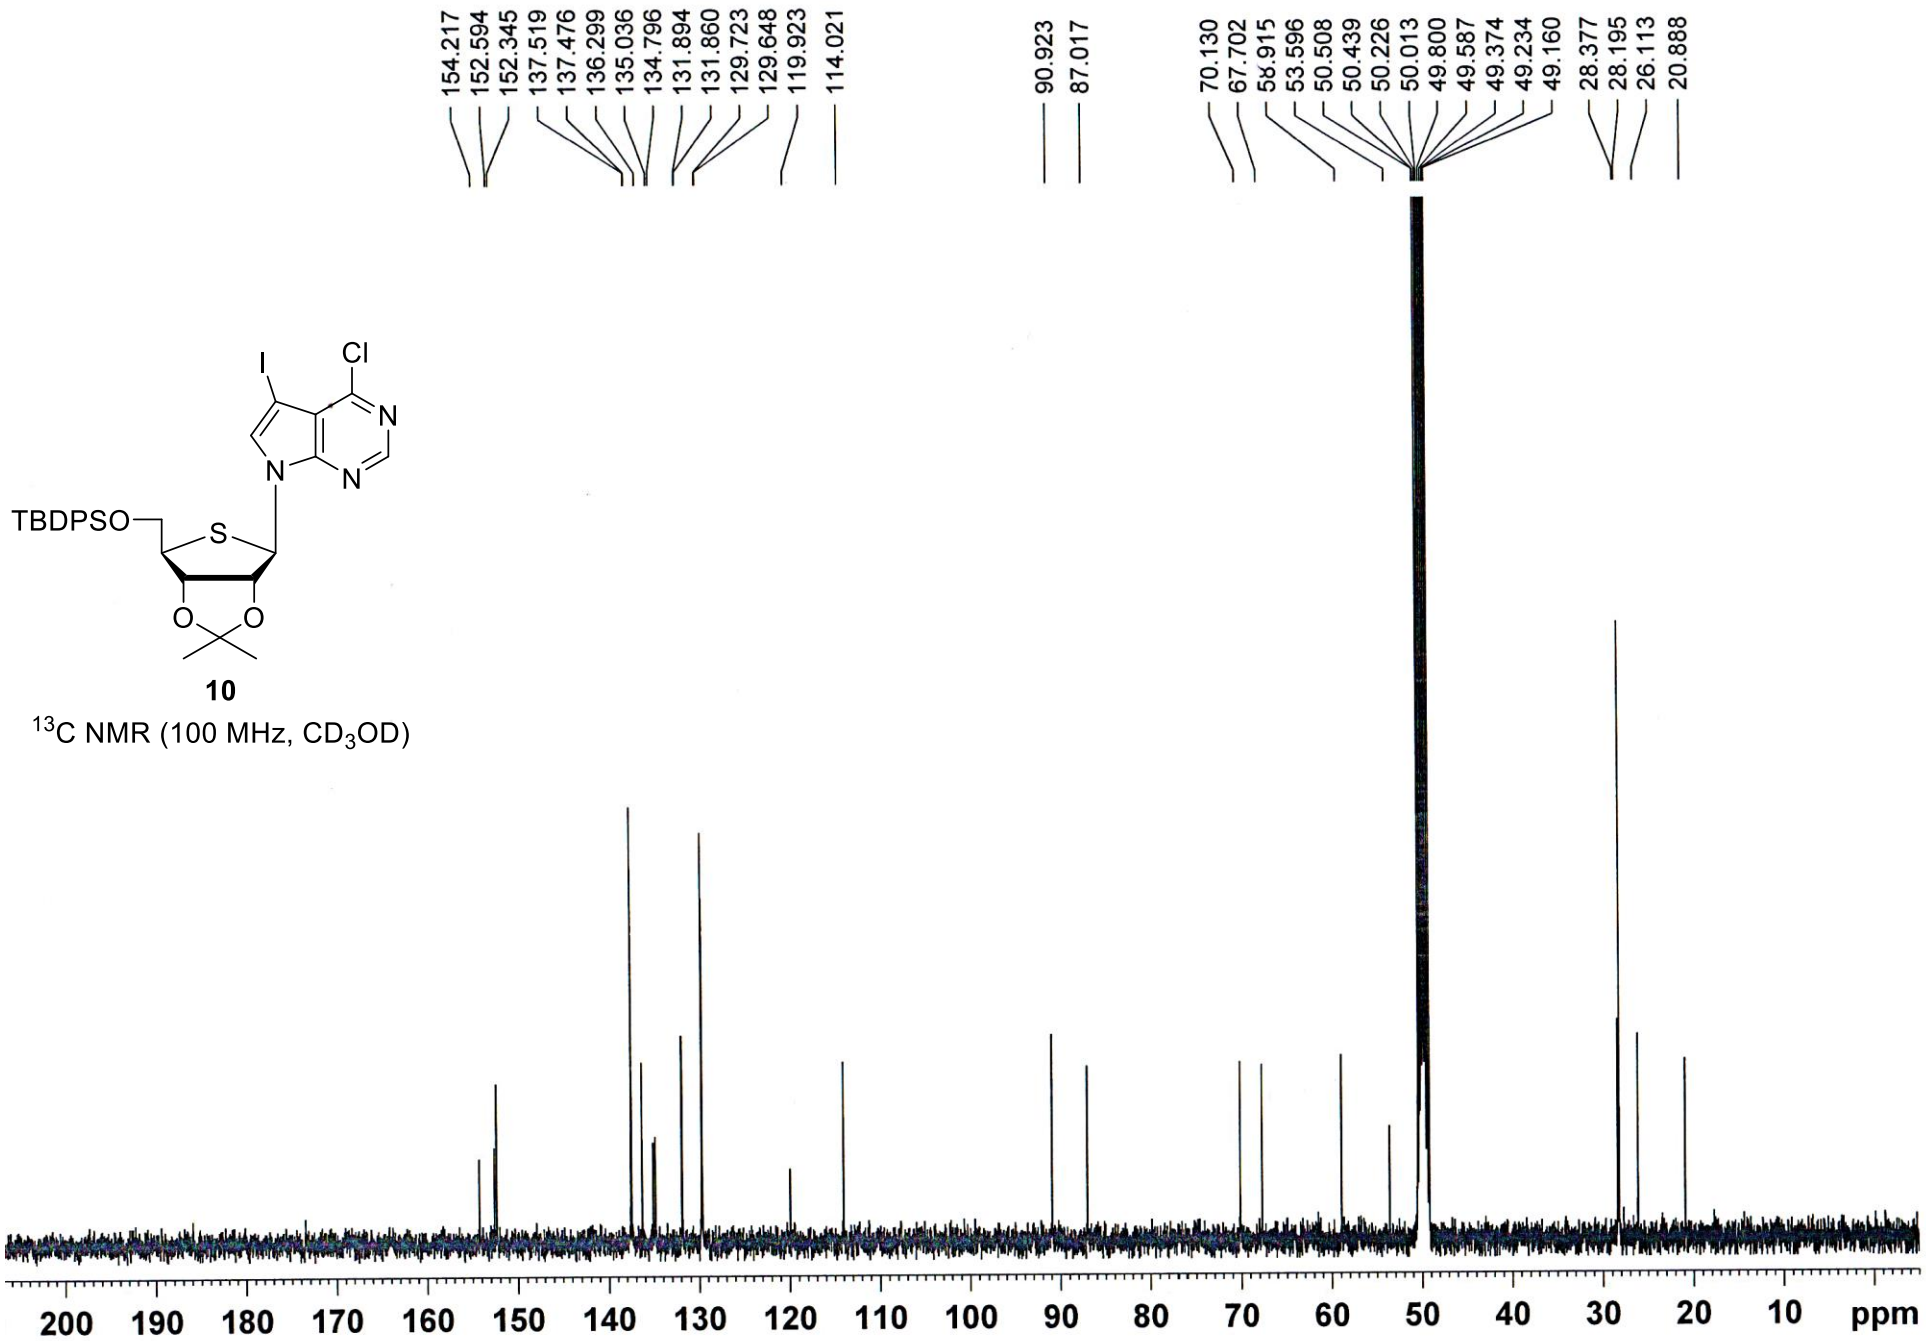

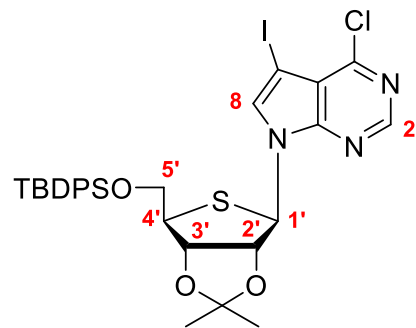

10

$^1\text{H}$ - $^1\text{H}$  NOESY (600 MHz,  $\text{CD}_3\text{OD}$ )

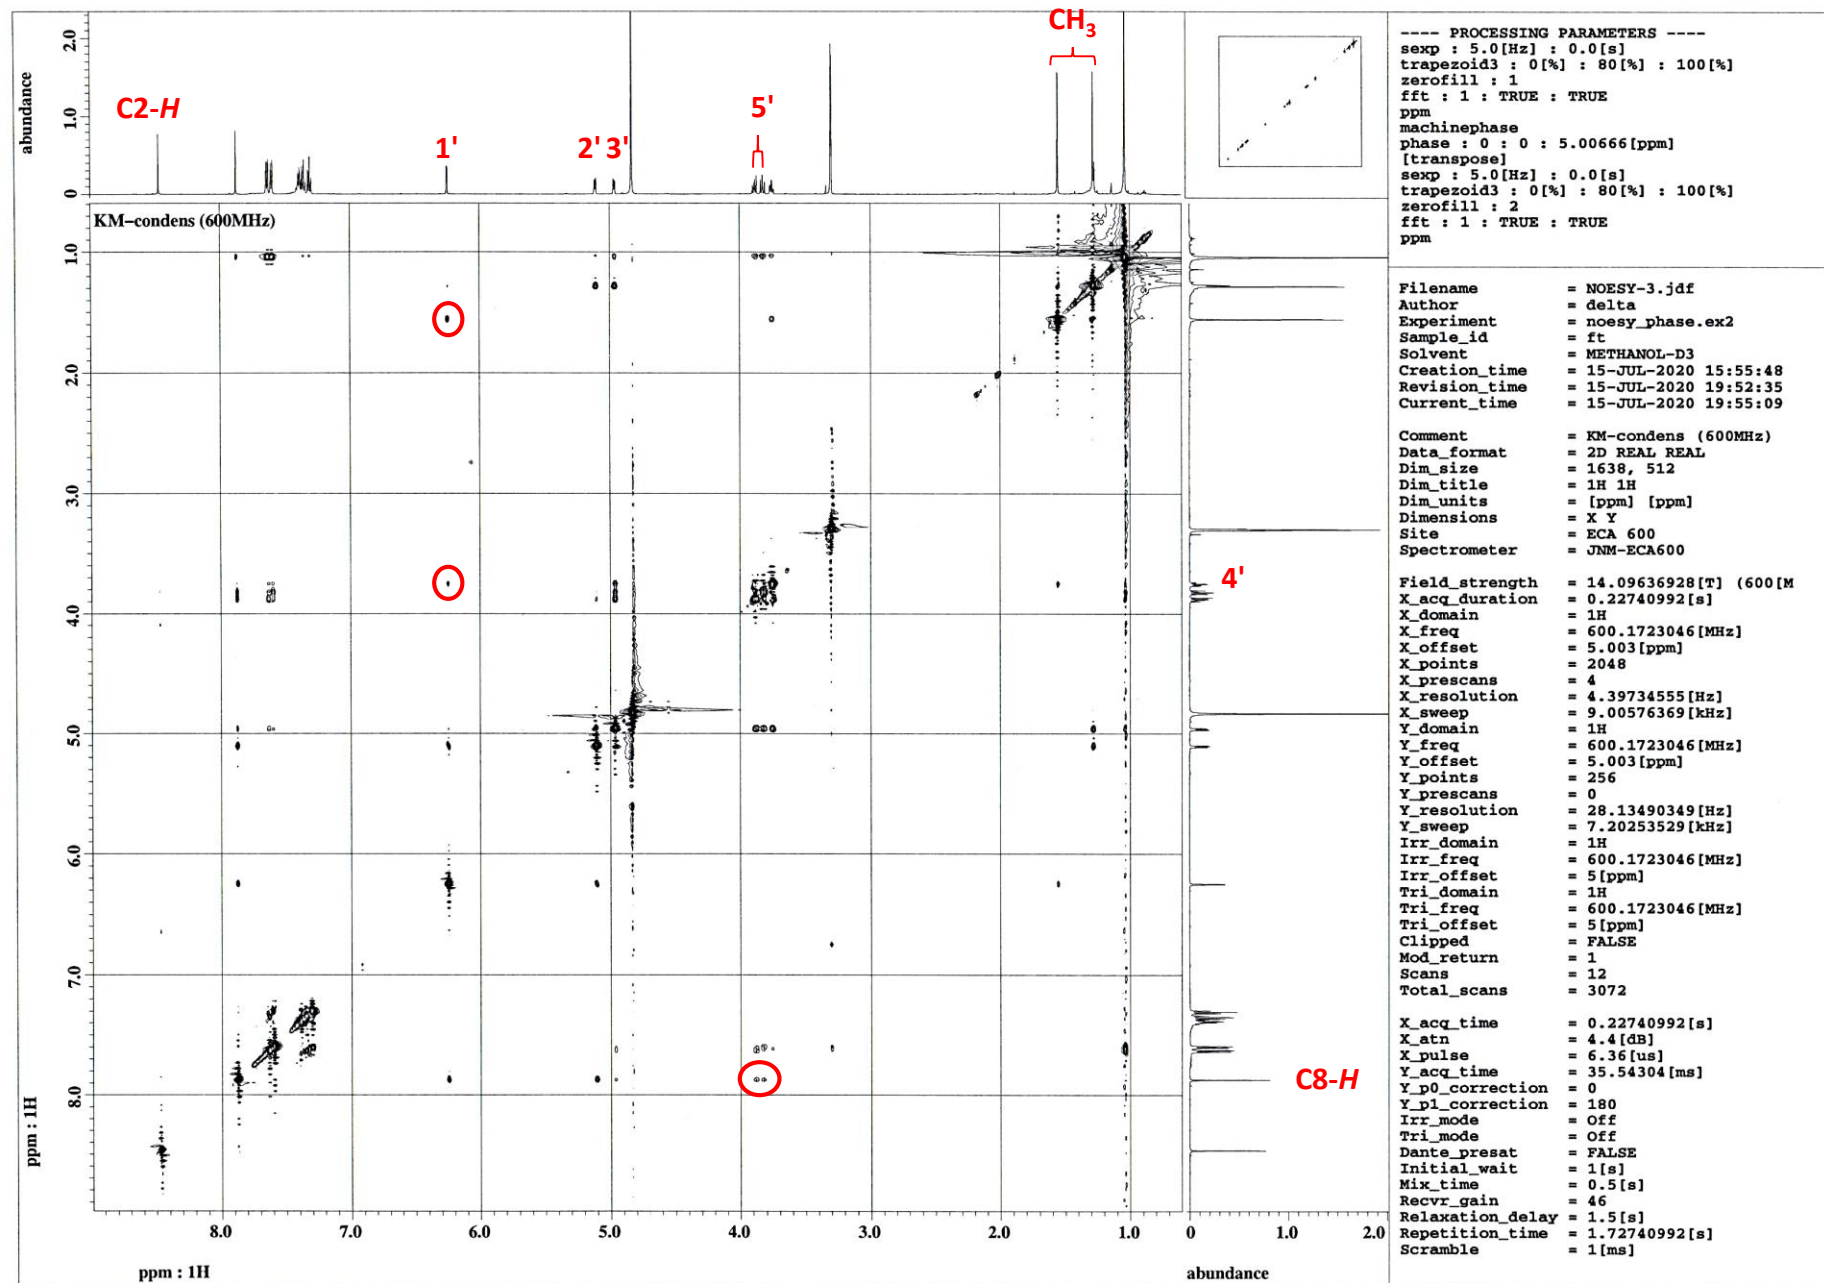

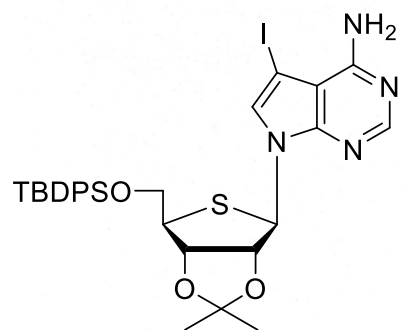

**11**

$^1\text{H}$  NMR (500 MHz,  $\text{CDCl}_3$ )

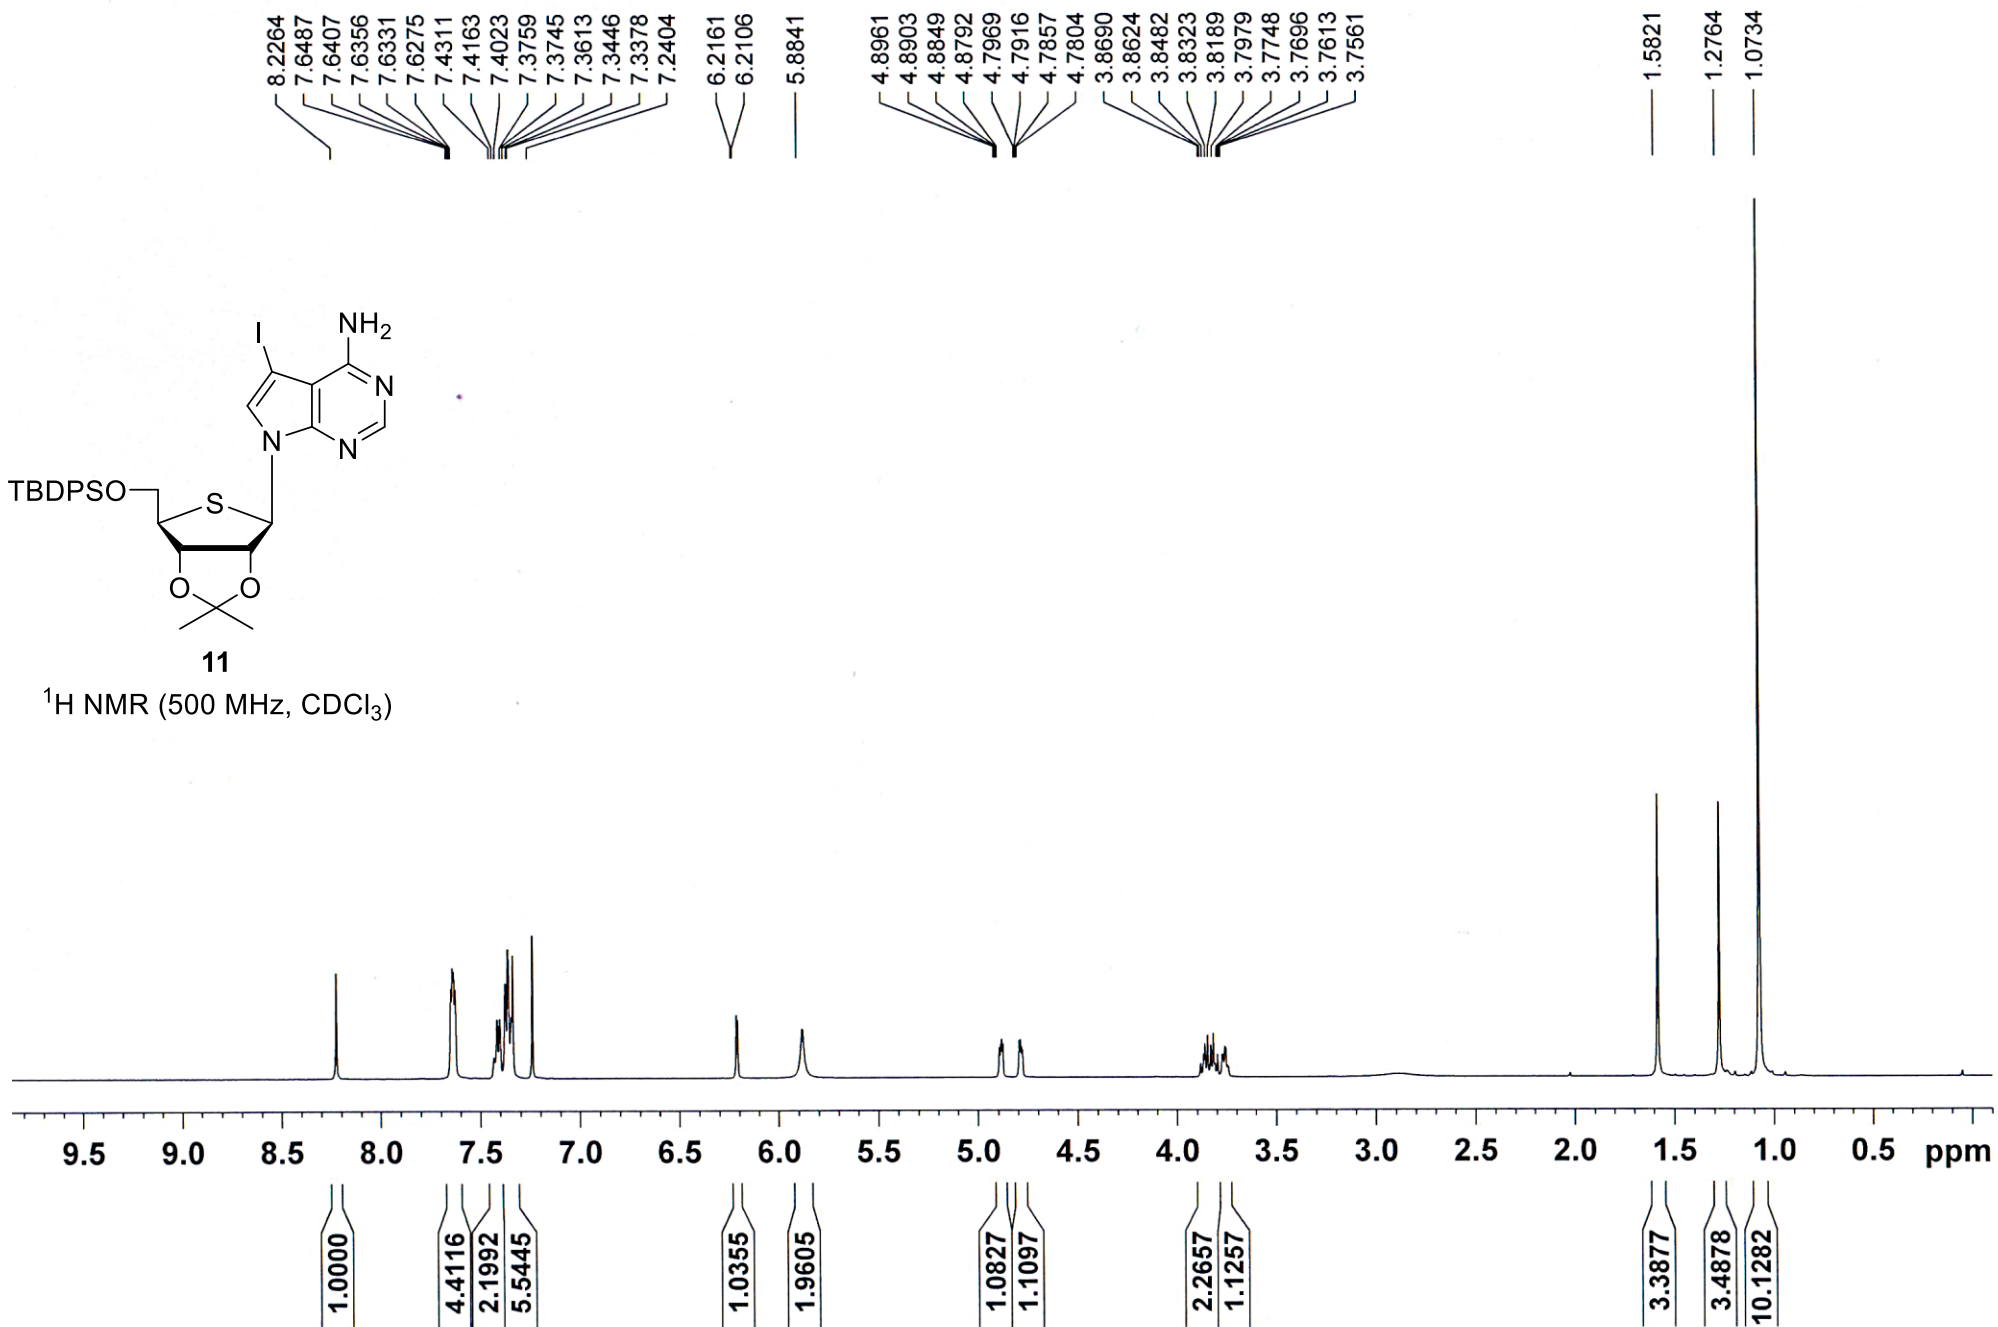



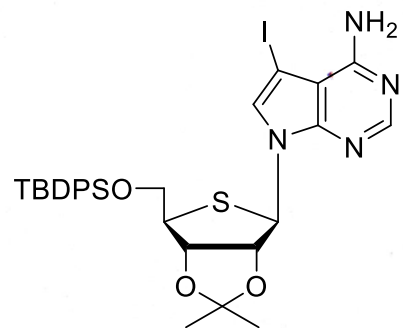

**11**

$^{13}\text{C}$  NMR (125 MHz,  $\text{CDCl}_3$ )

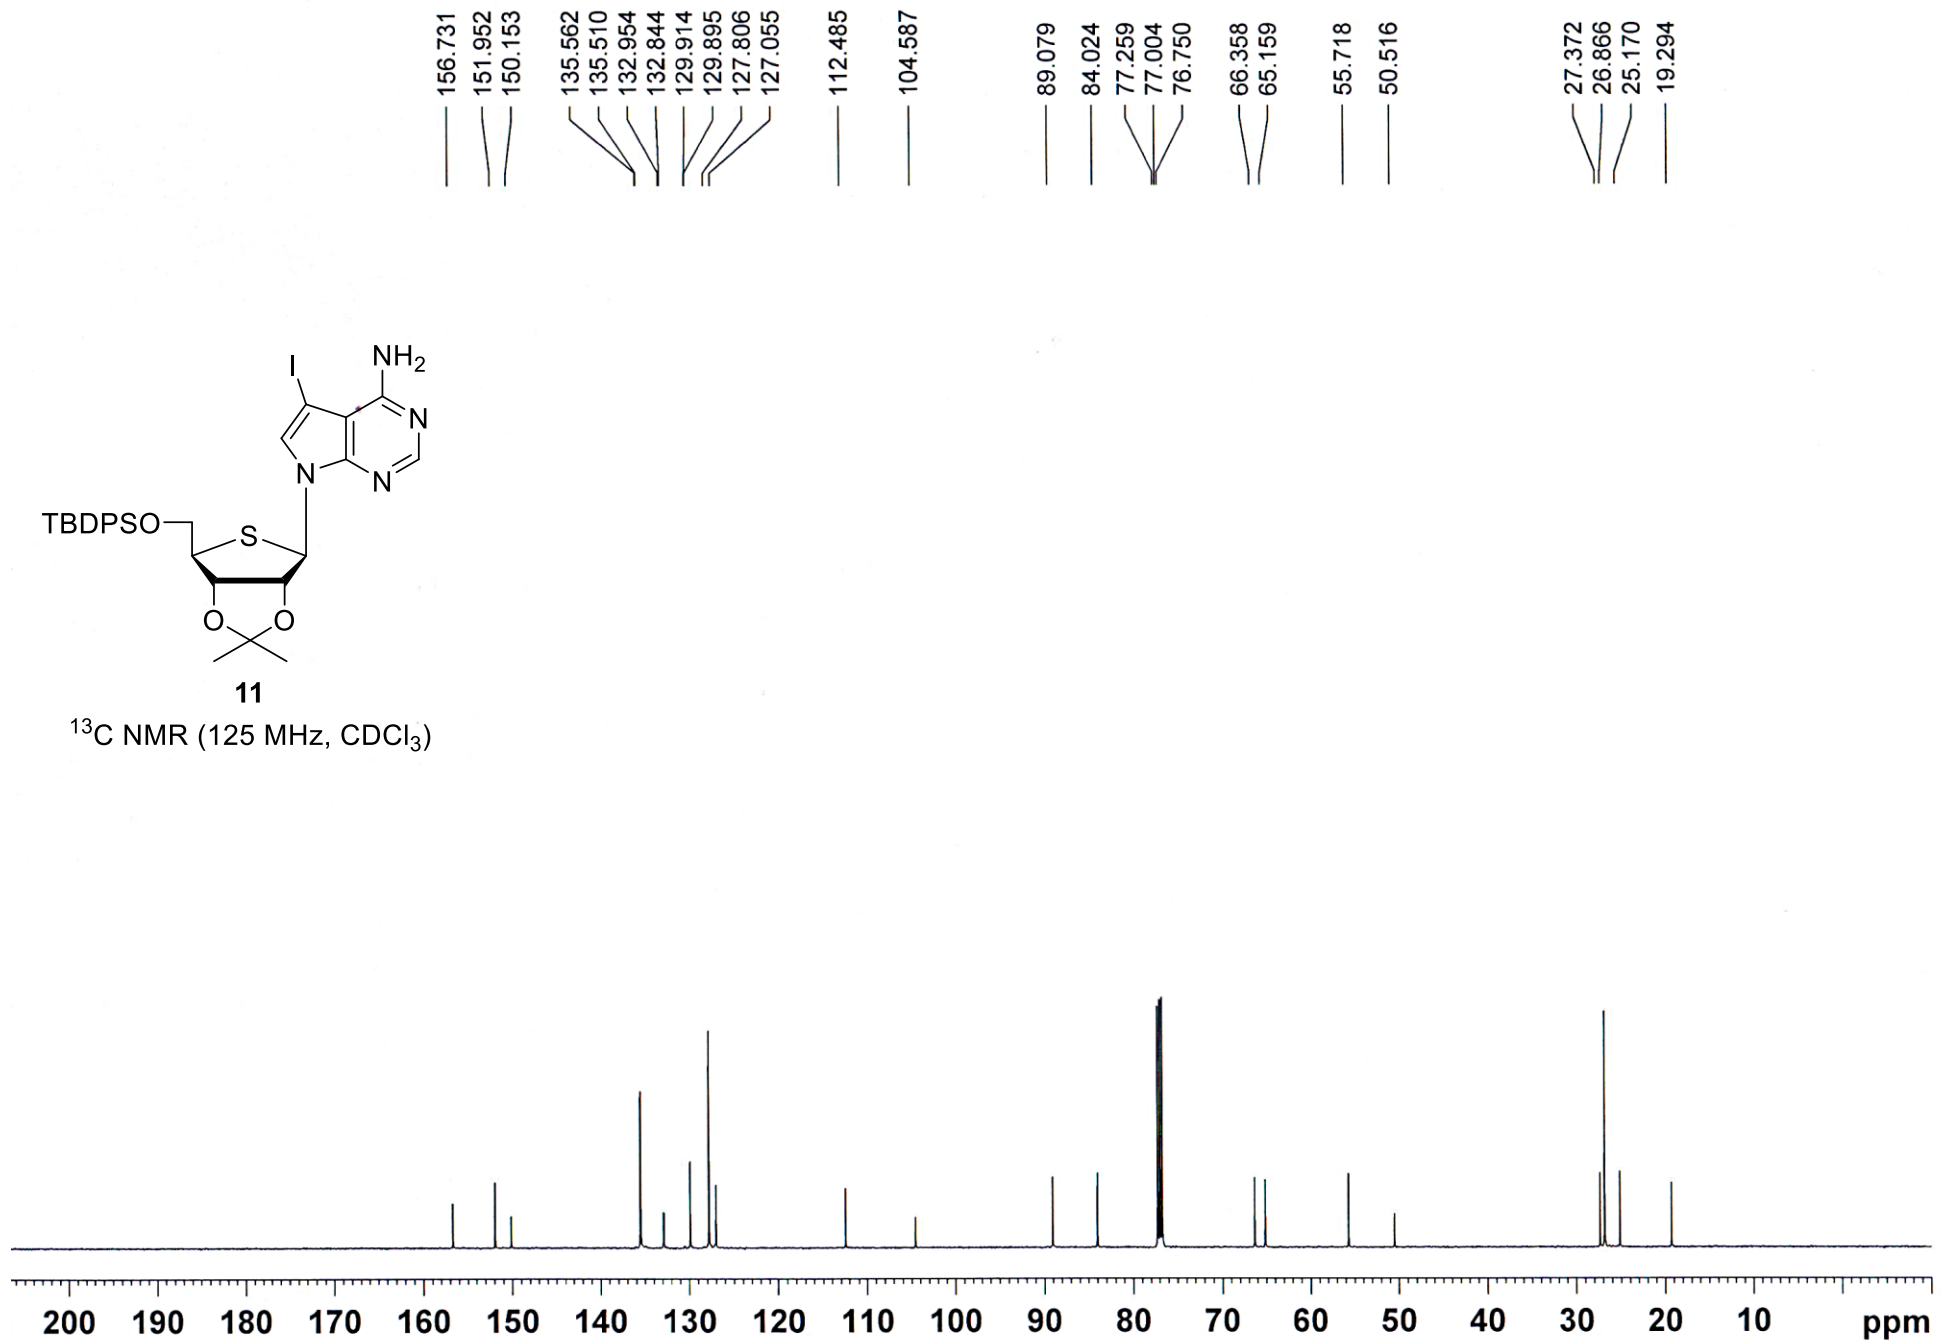

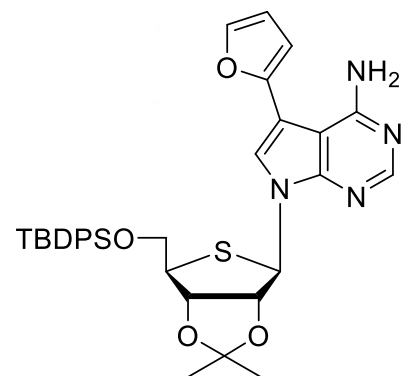

**12a**

$^1\text{H}$  NMR (400 MHz,  $\text{CDCl}_3$ )

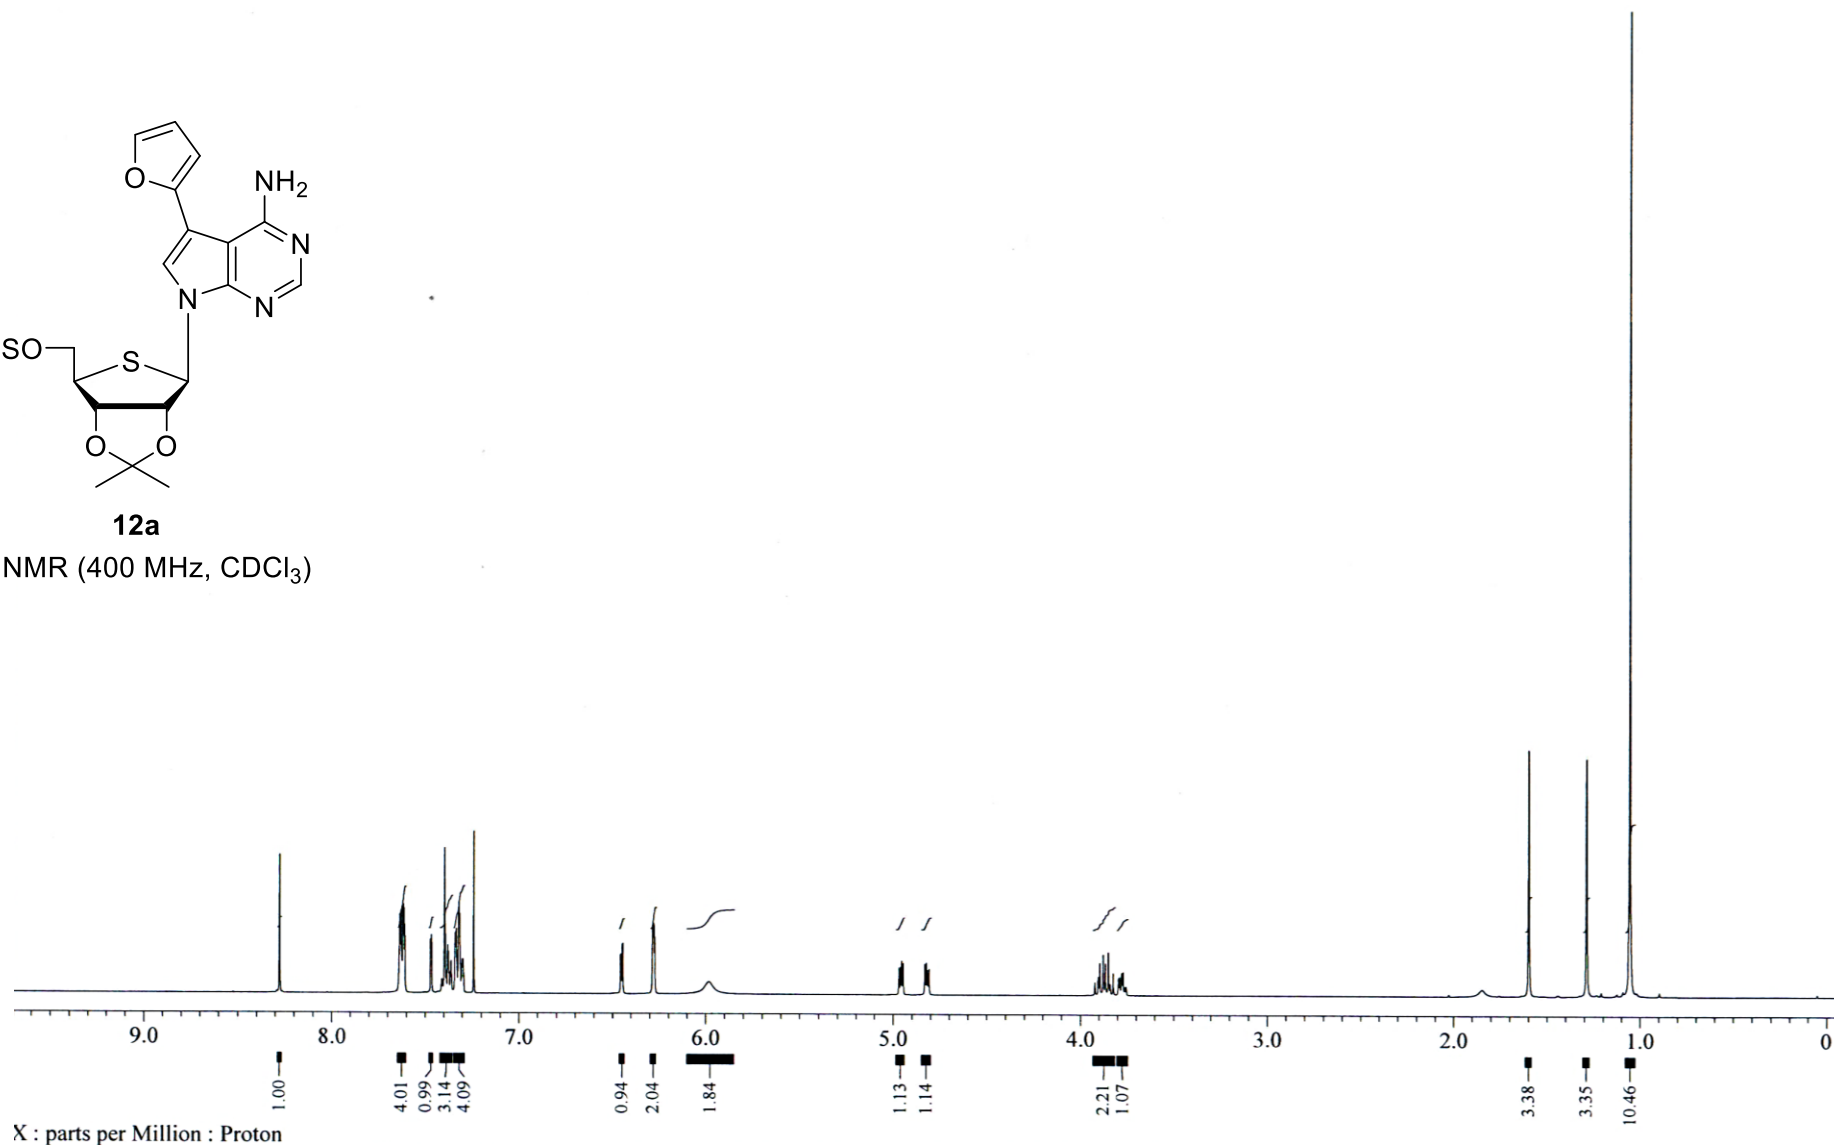



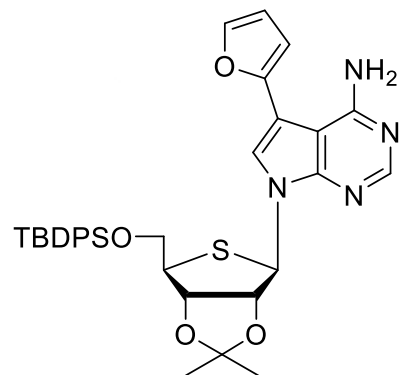

**12a**

$^{13}\text{C}$  NMR (100 MHz,  $\text{CDCl}_3$ )

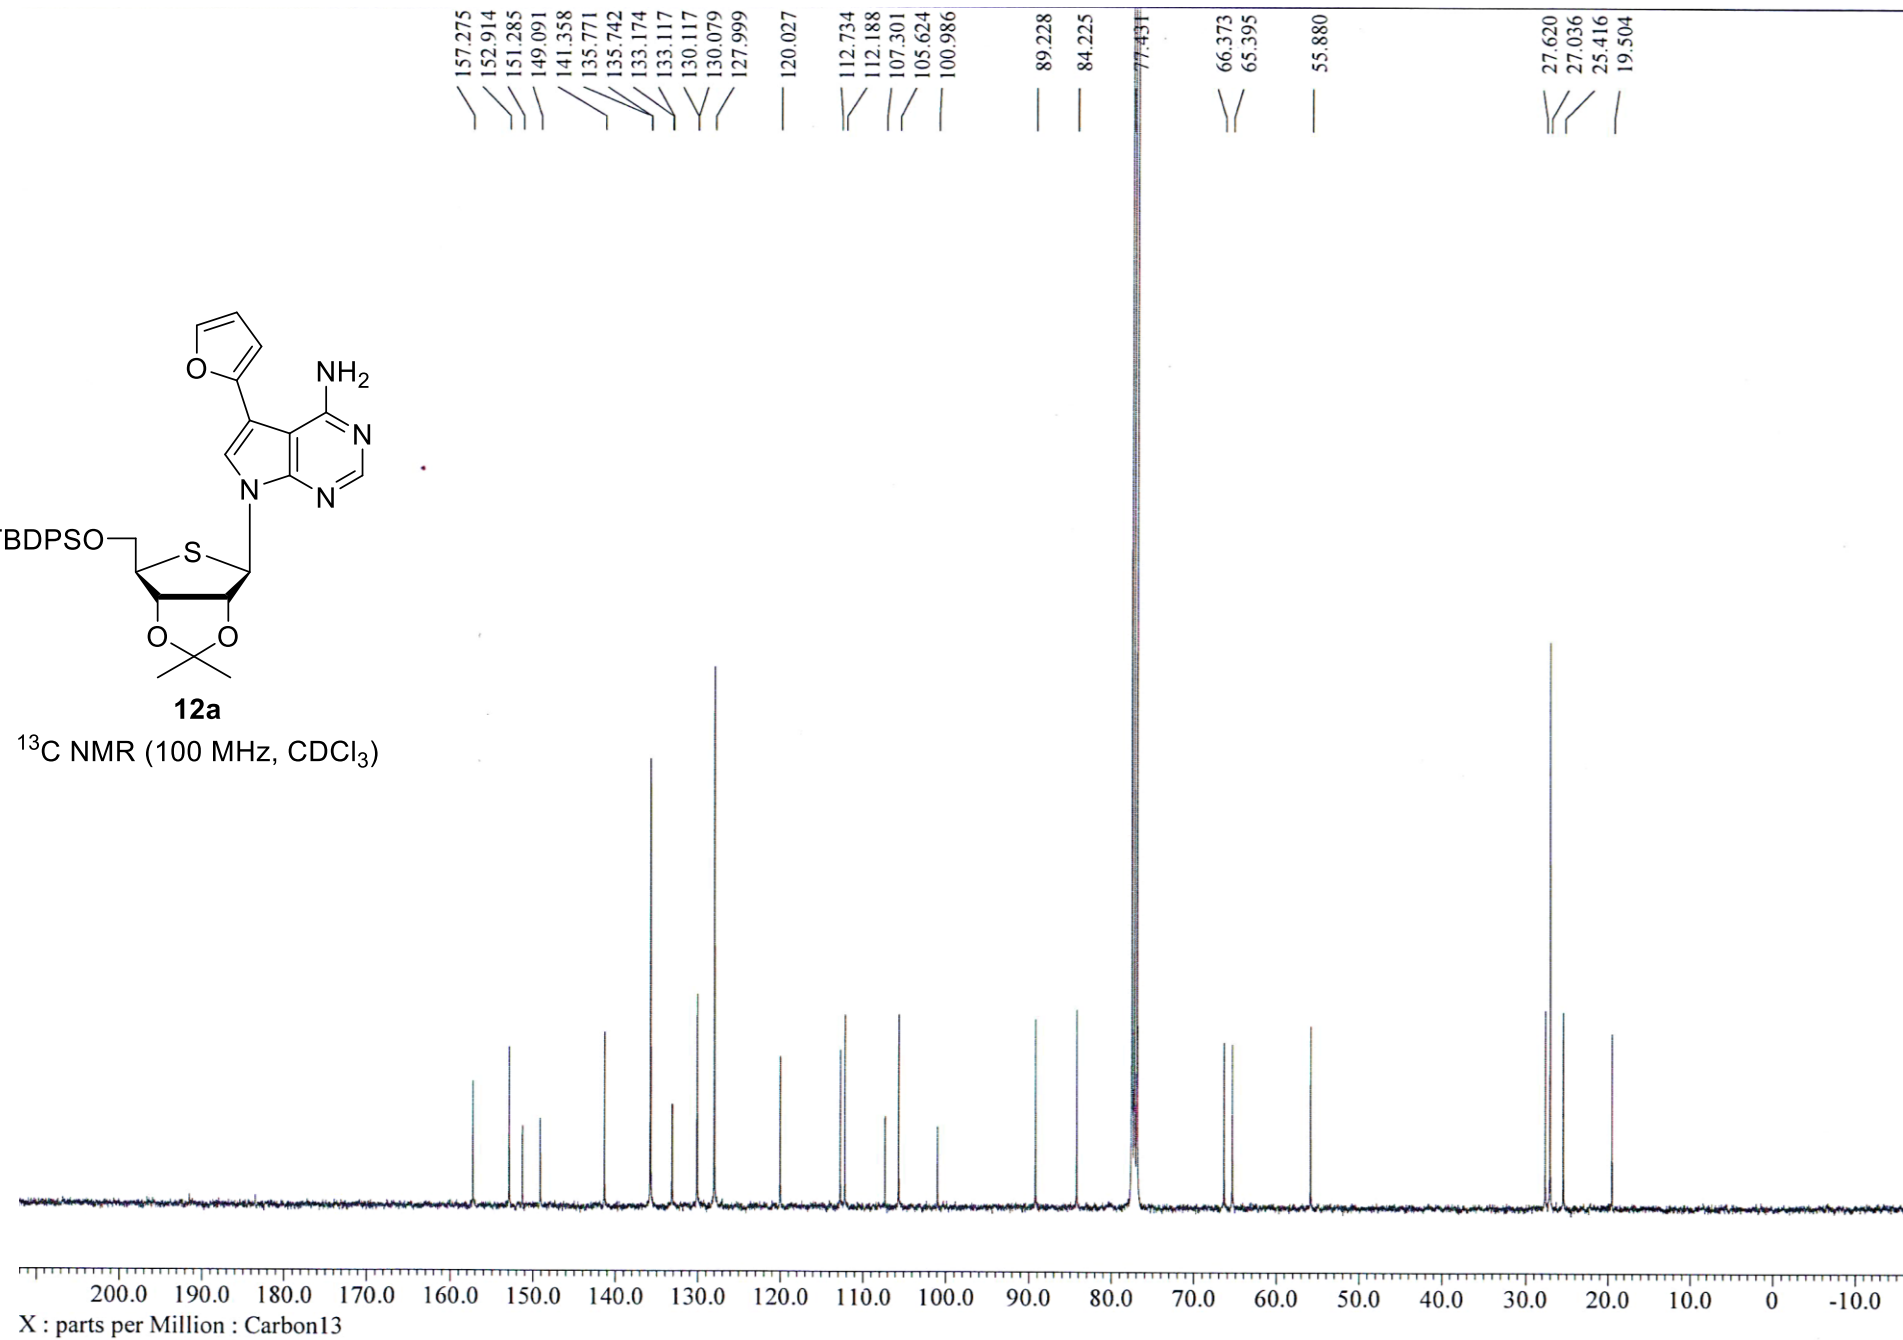

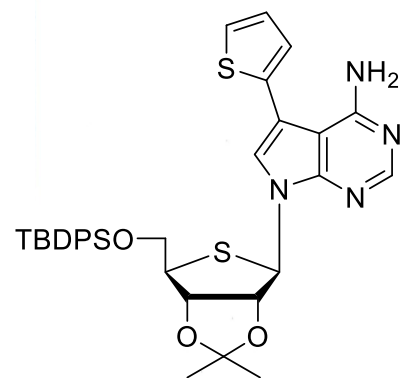

**12b**

$^1\text{H}$  NMR (400 MHz,  $\text{CDCl}_3$ )

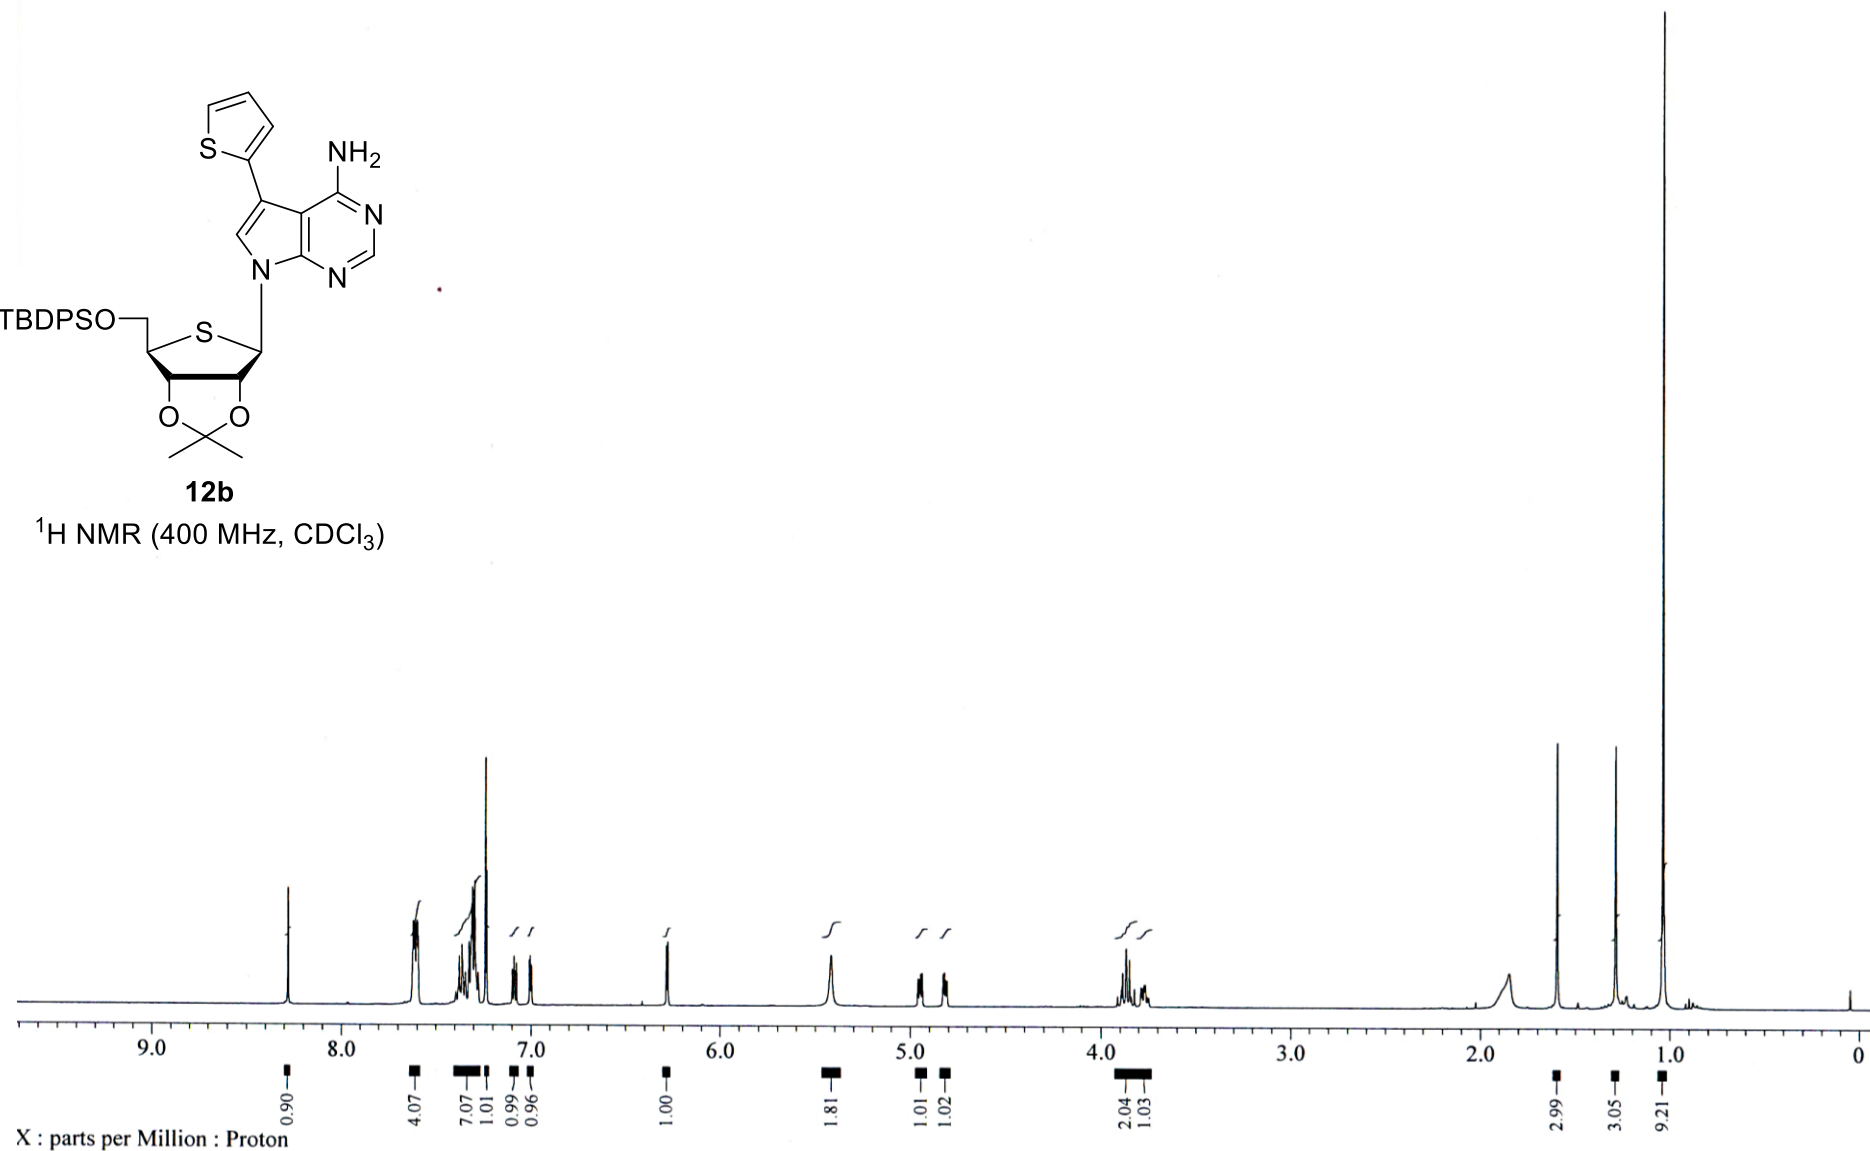

\_Carbon-1-2.jdf

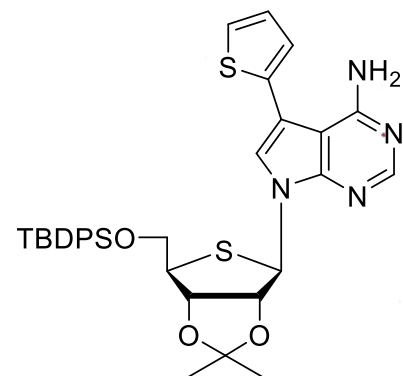

**12b**

$^{13}\text{C}$  NMR (100 MHz,  $\text{CDCl}_3$ )

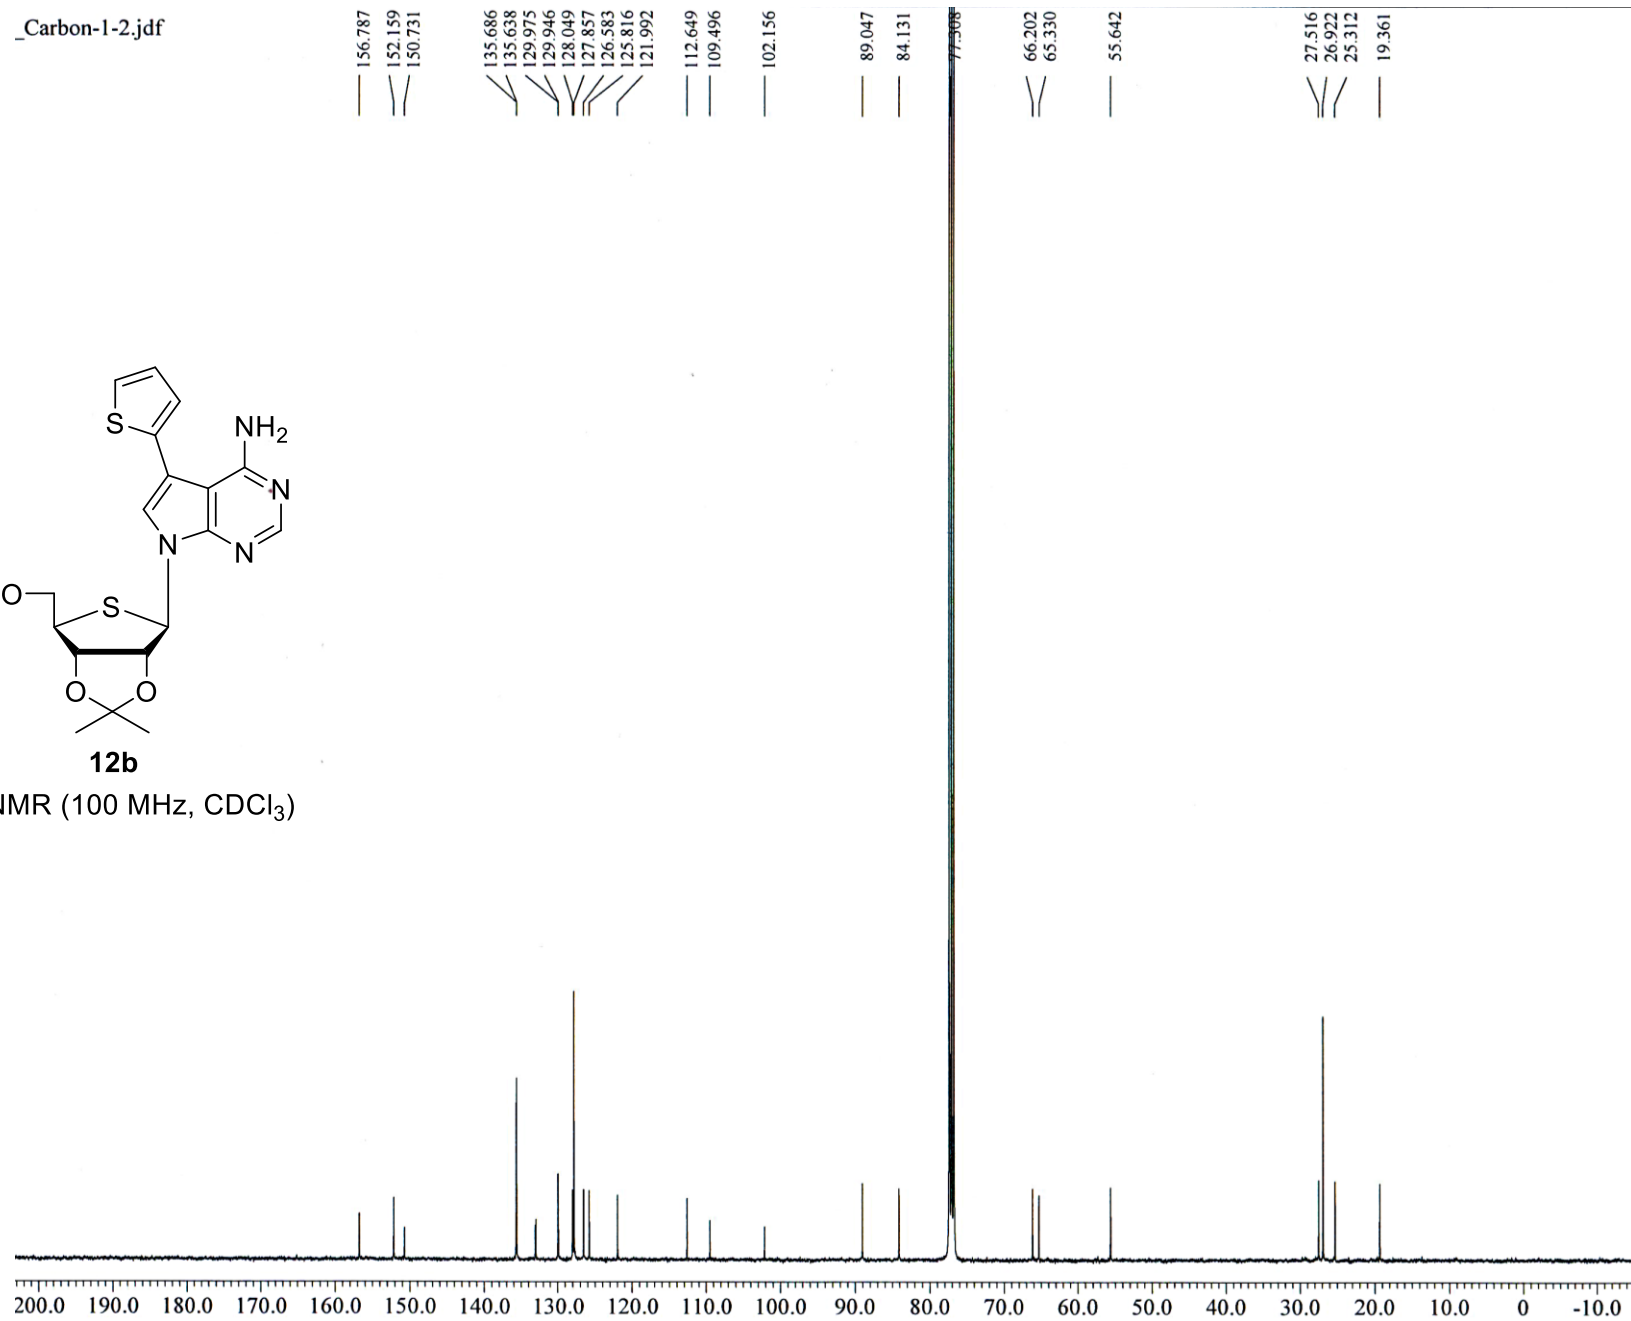

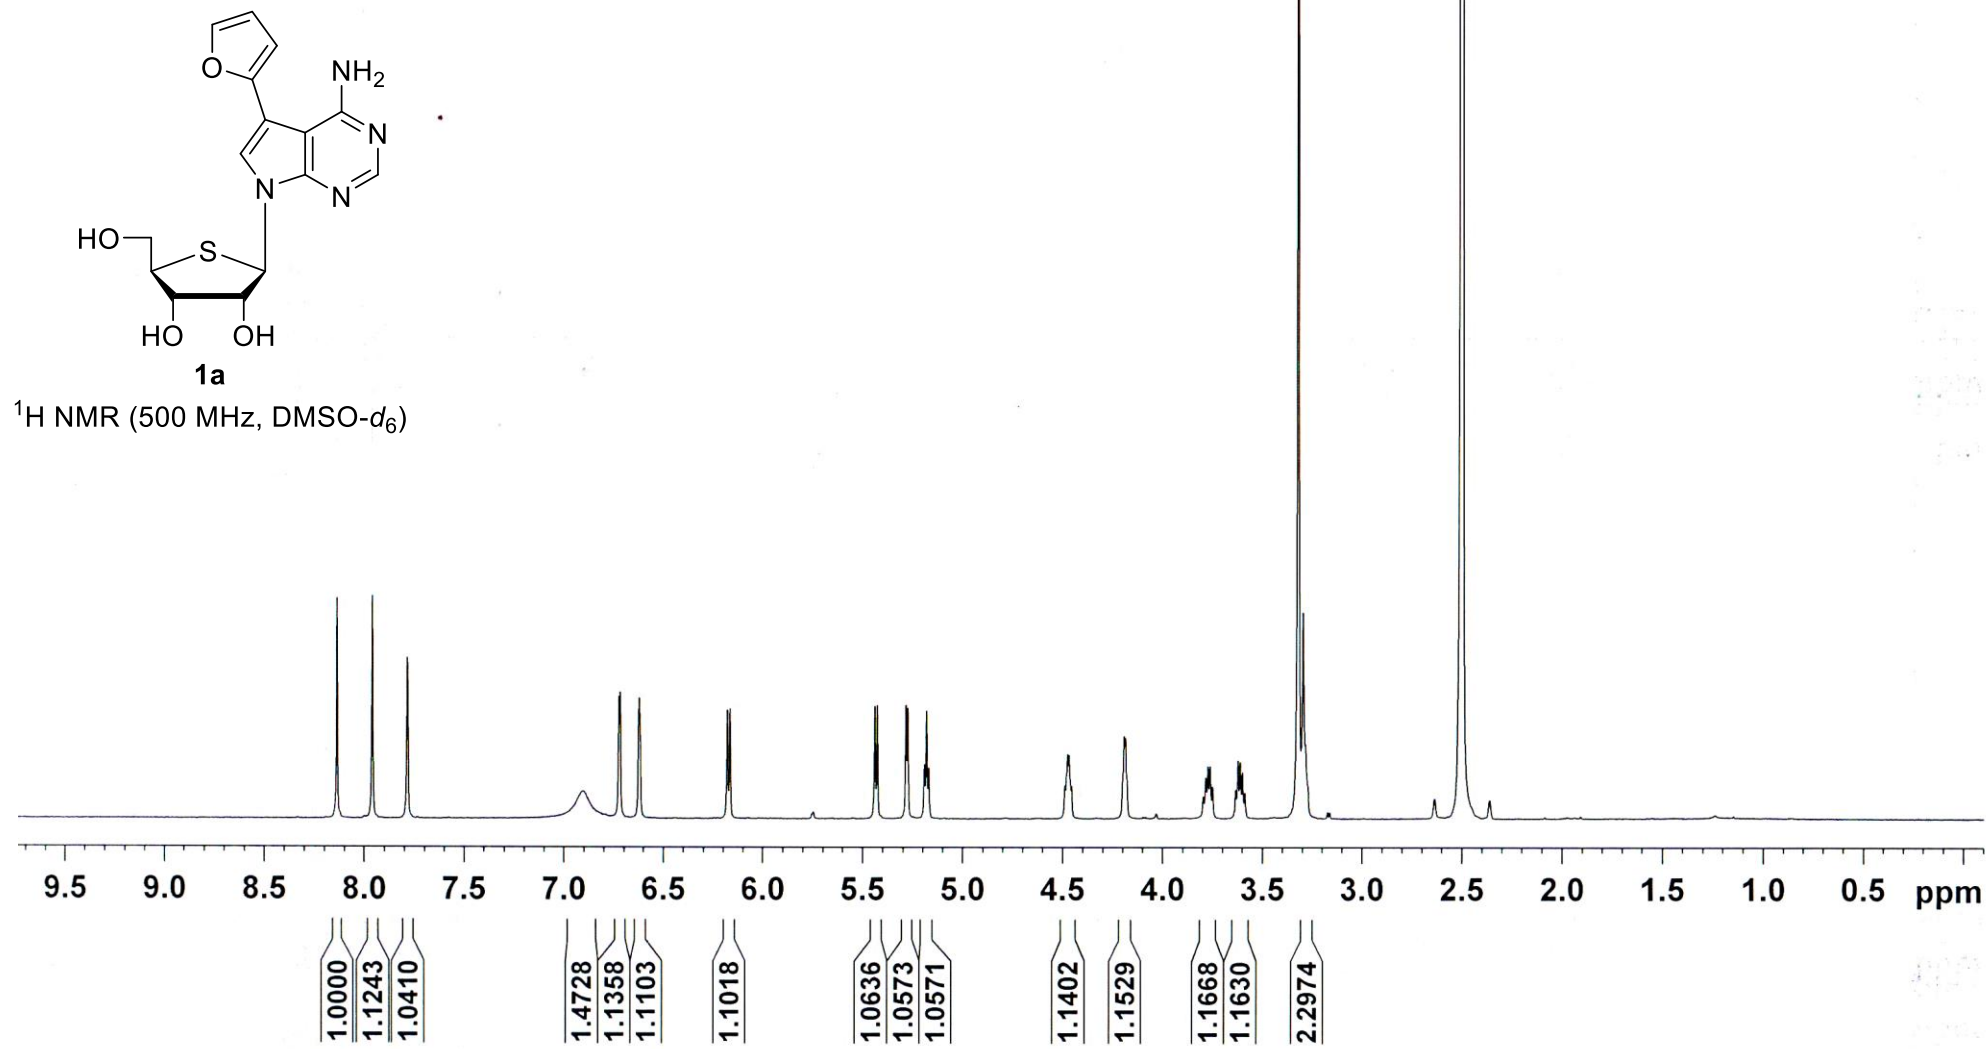

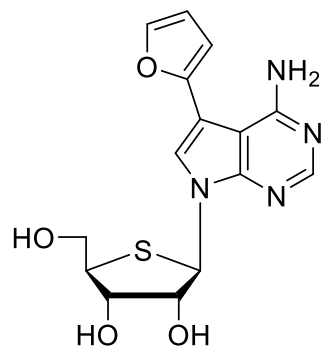

**1a**

$^1\text{H}$  NMR (500 MHz,  $\text{DMSO}-d_6 + \text{D}_2\text{O}$ )

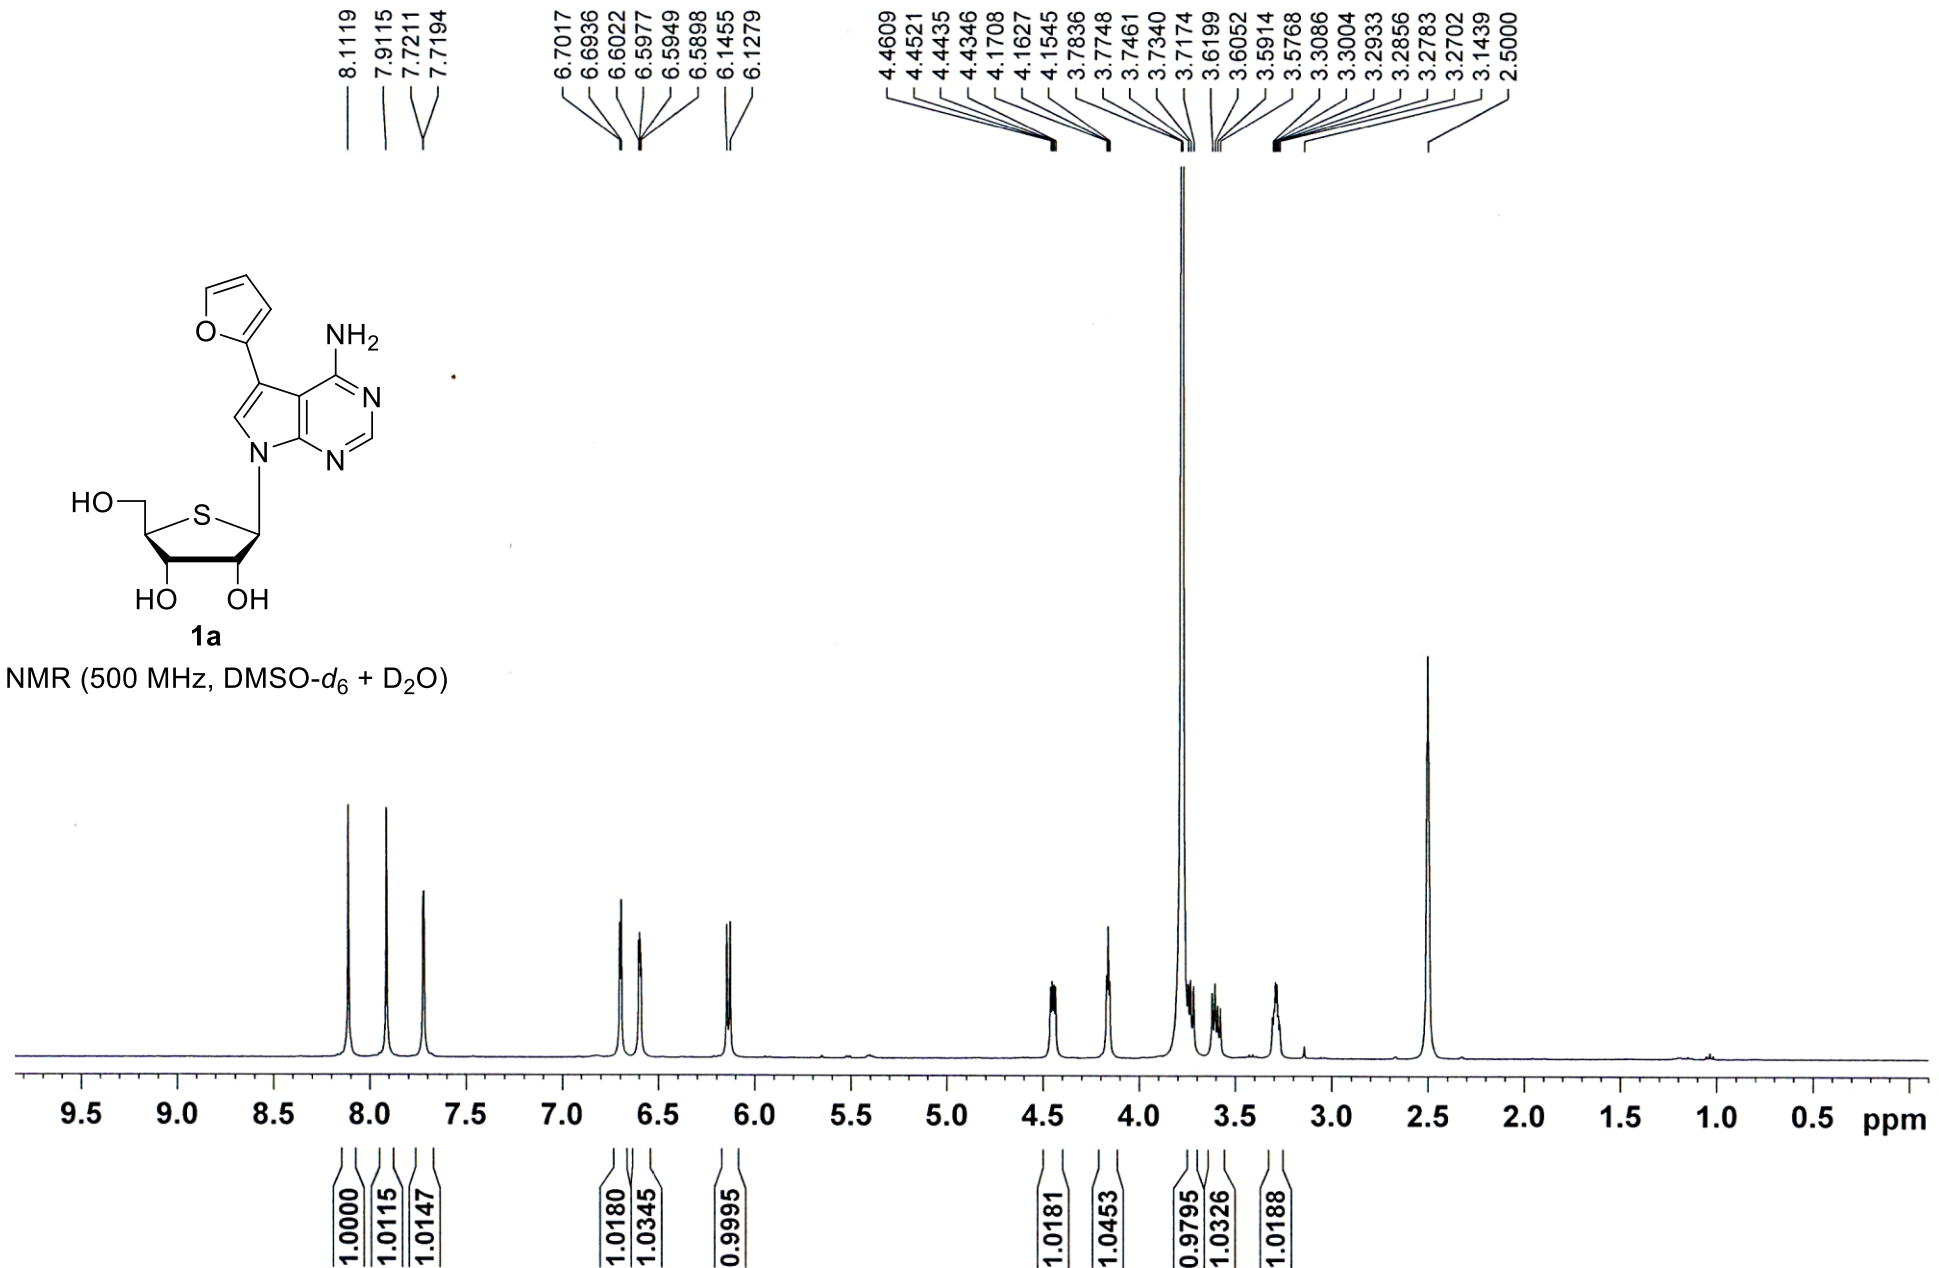

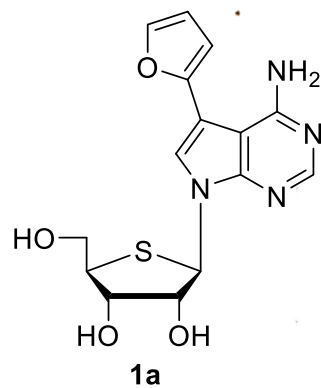

$^{13}\text{C}$  NMR (100 MHz,  $\text{DMSO}-d_6$ )

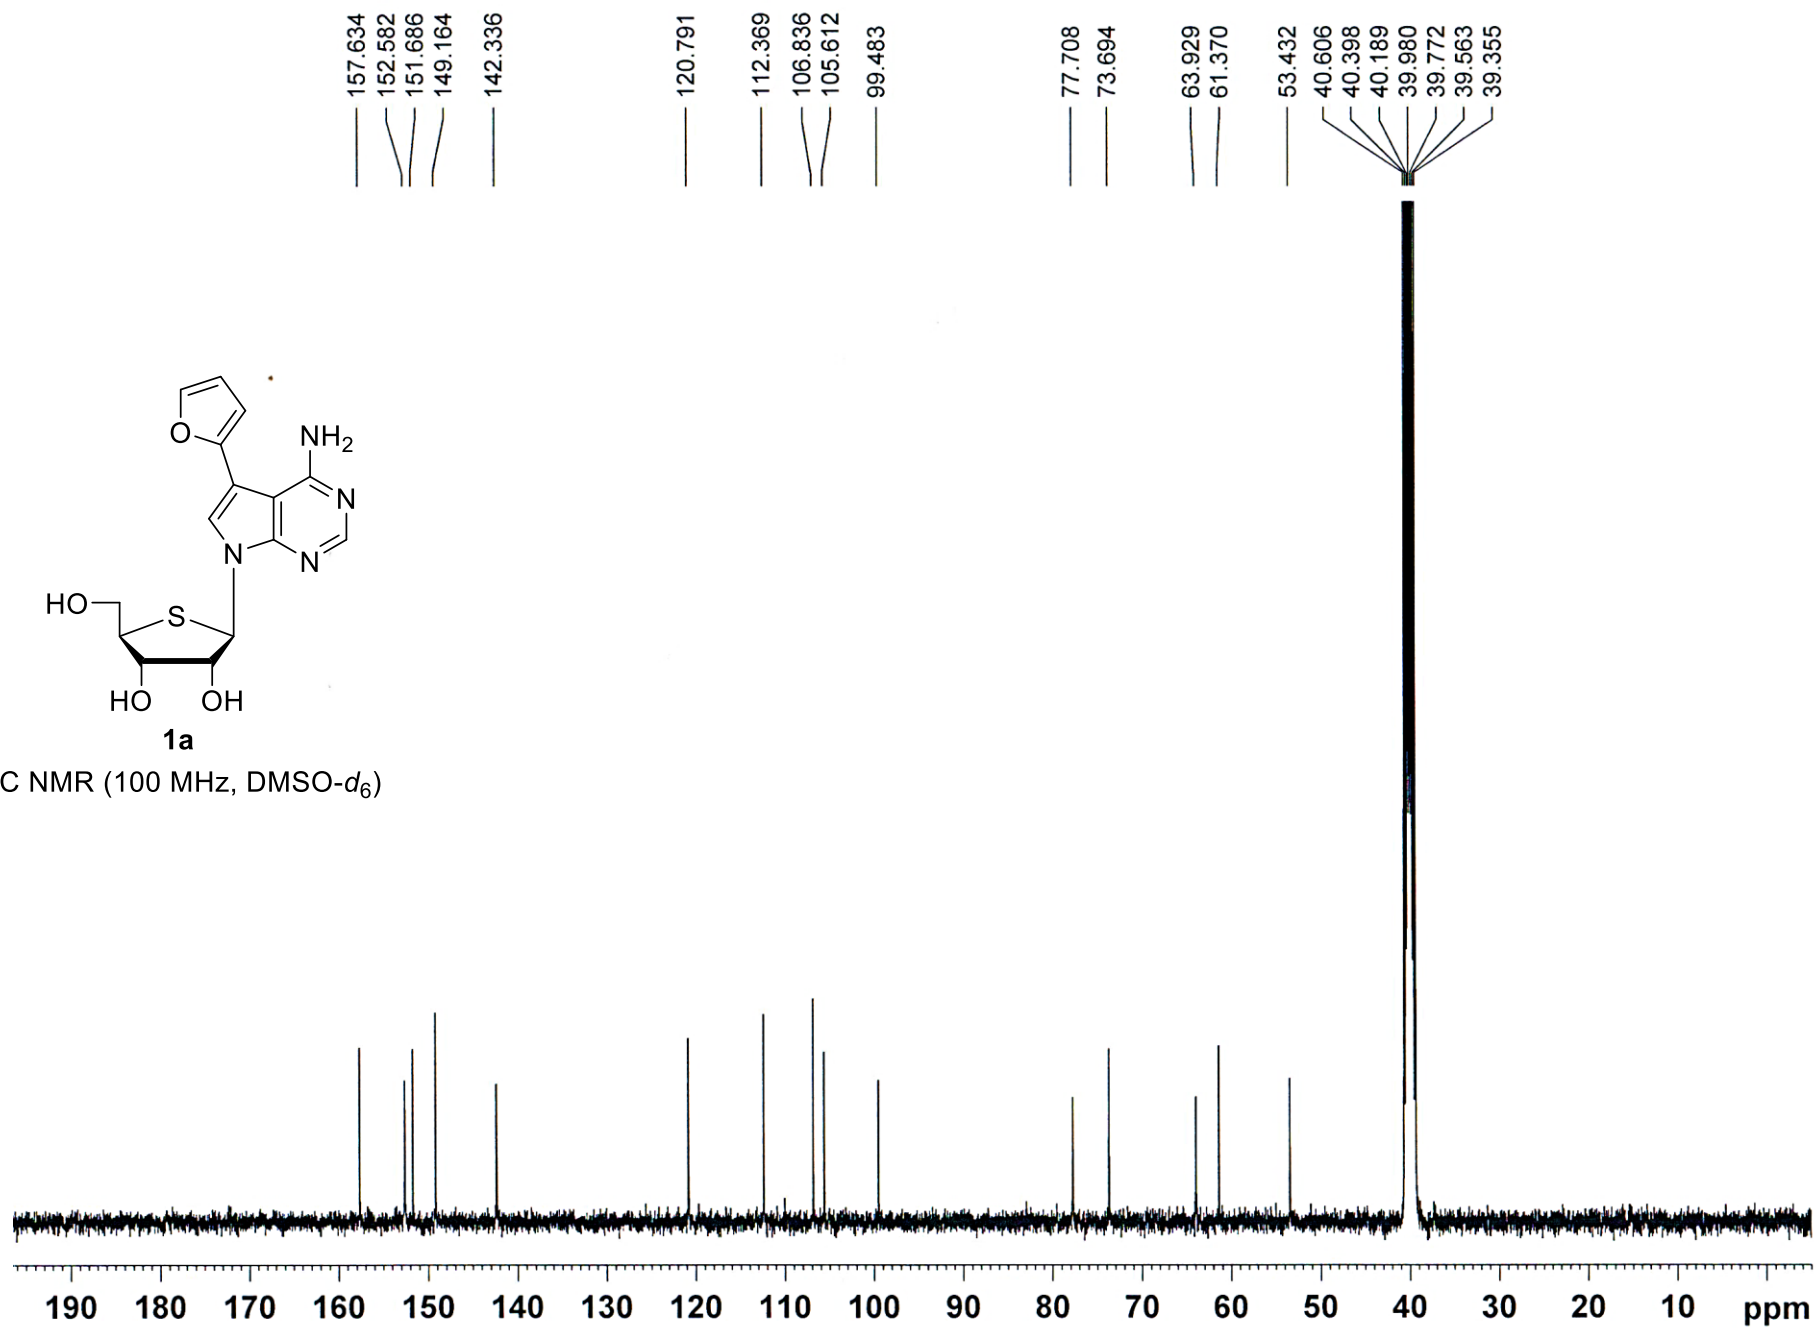

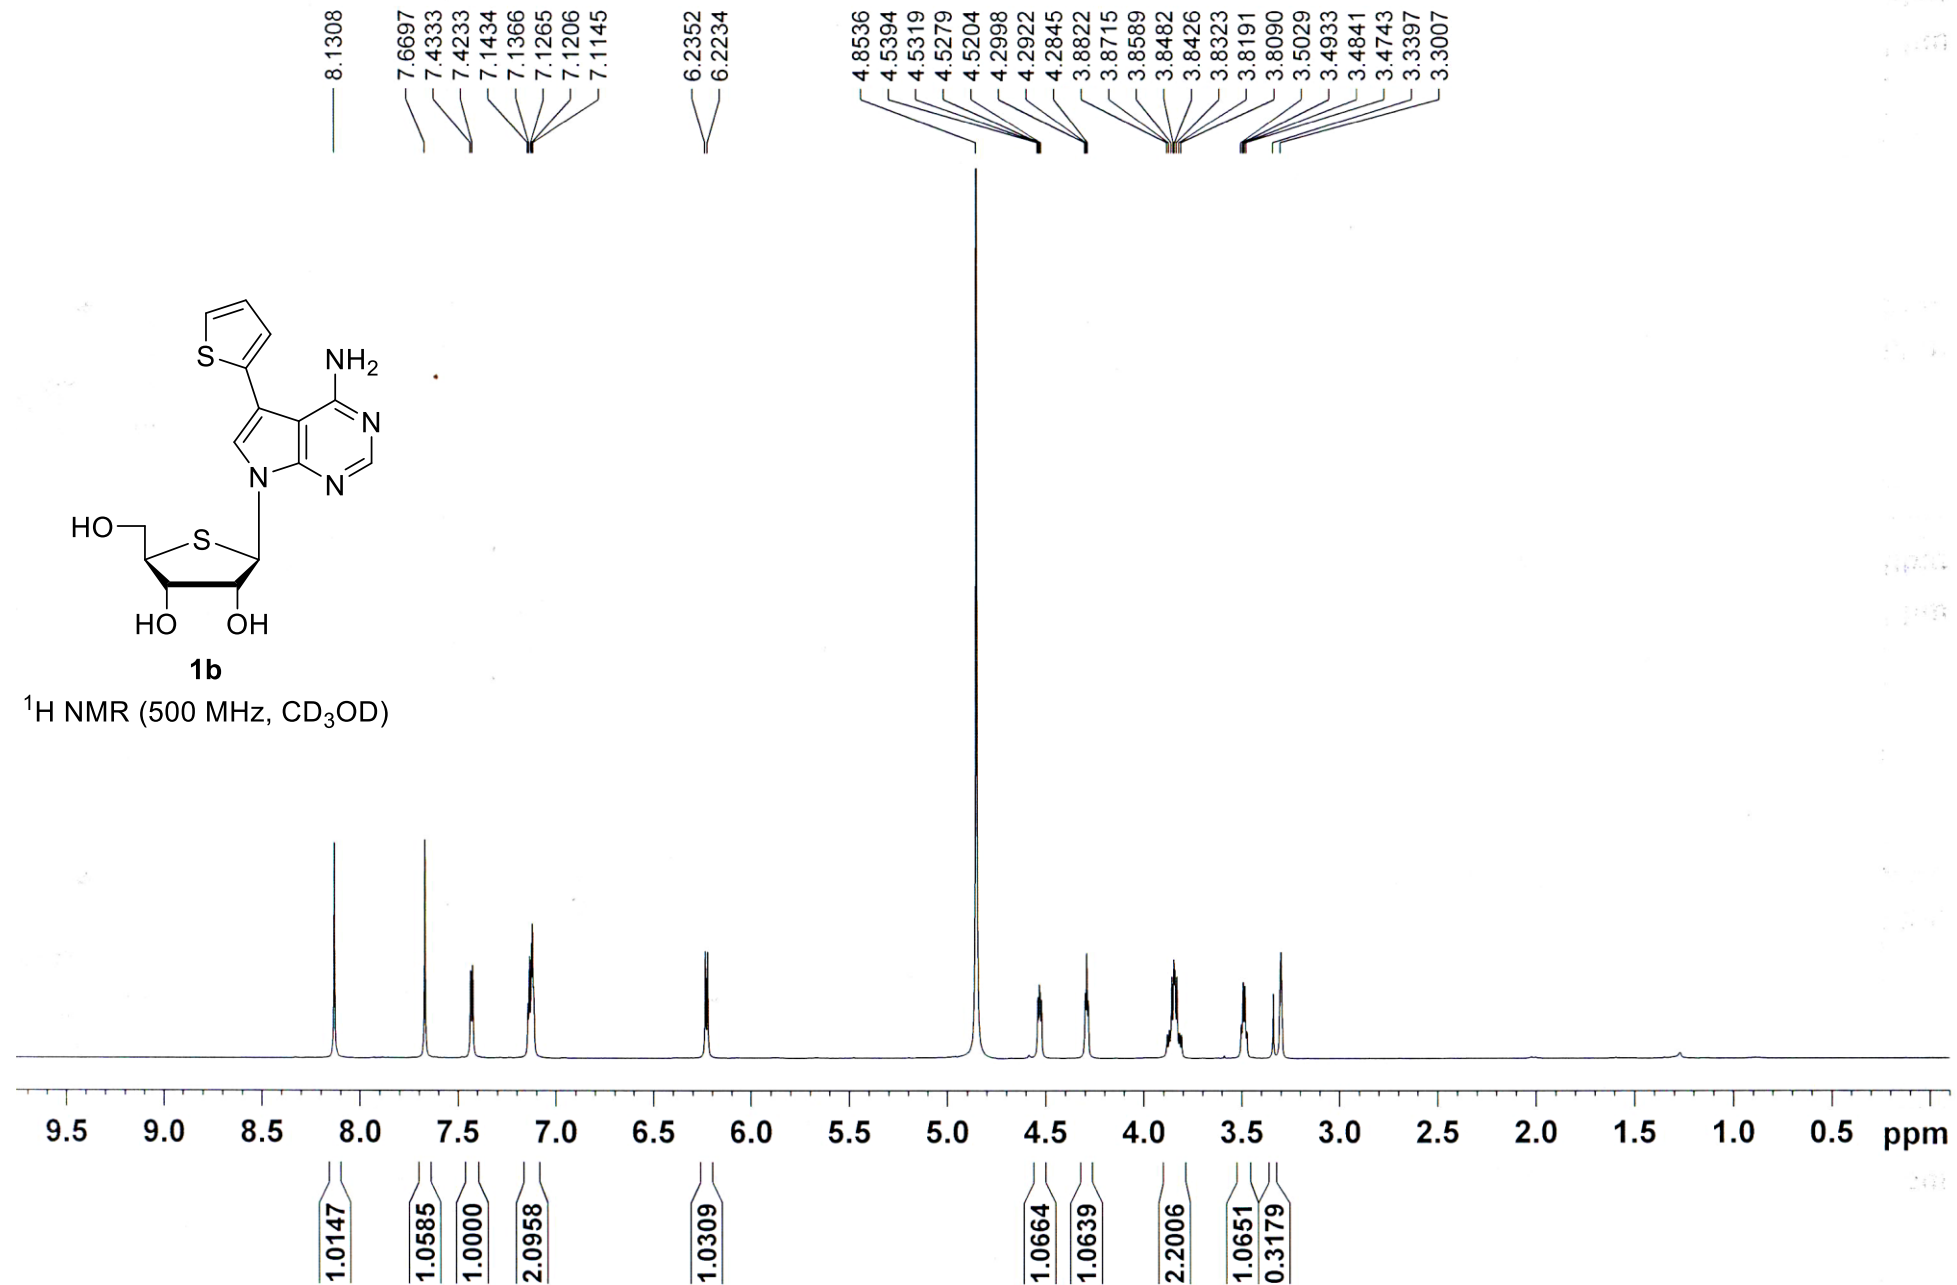

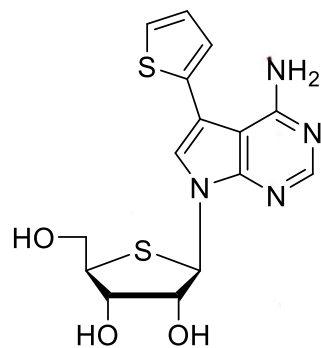

**1b**

$^{13}\text{C}$  NMR (125 MHz,  $\text{CD}_3\text{OD}$ )

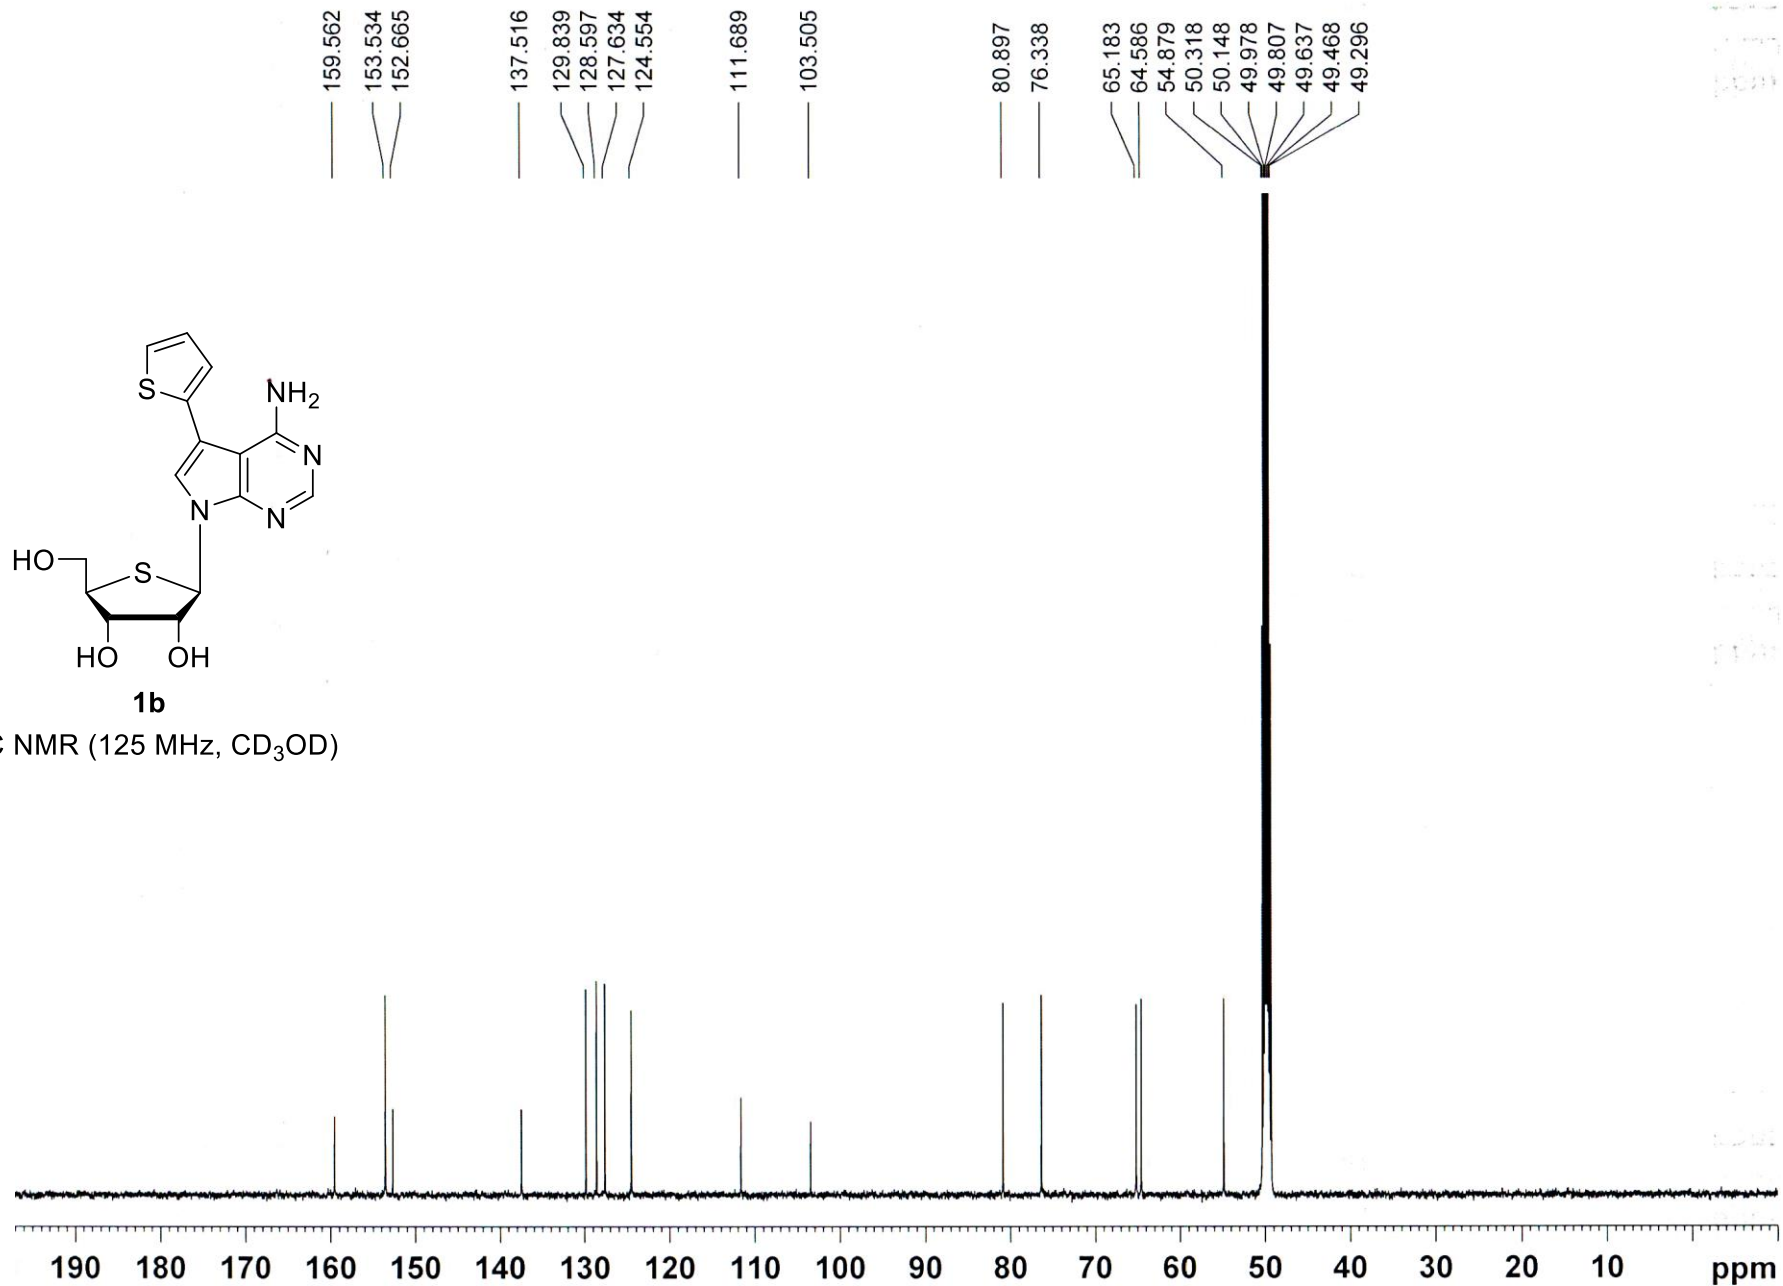



KM-DC13\_Proton-1-2.jdf

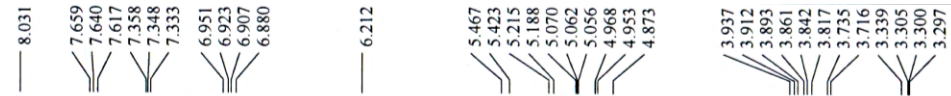

**12c**

<sup>1</sup>H NMR (400 MHz, CD<sub>3</sub>OD)

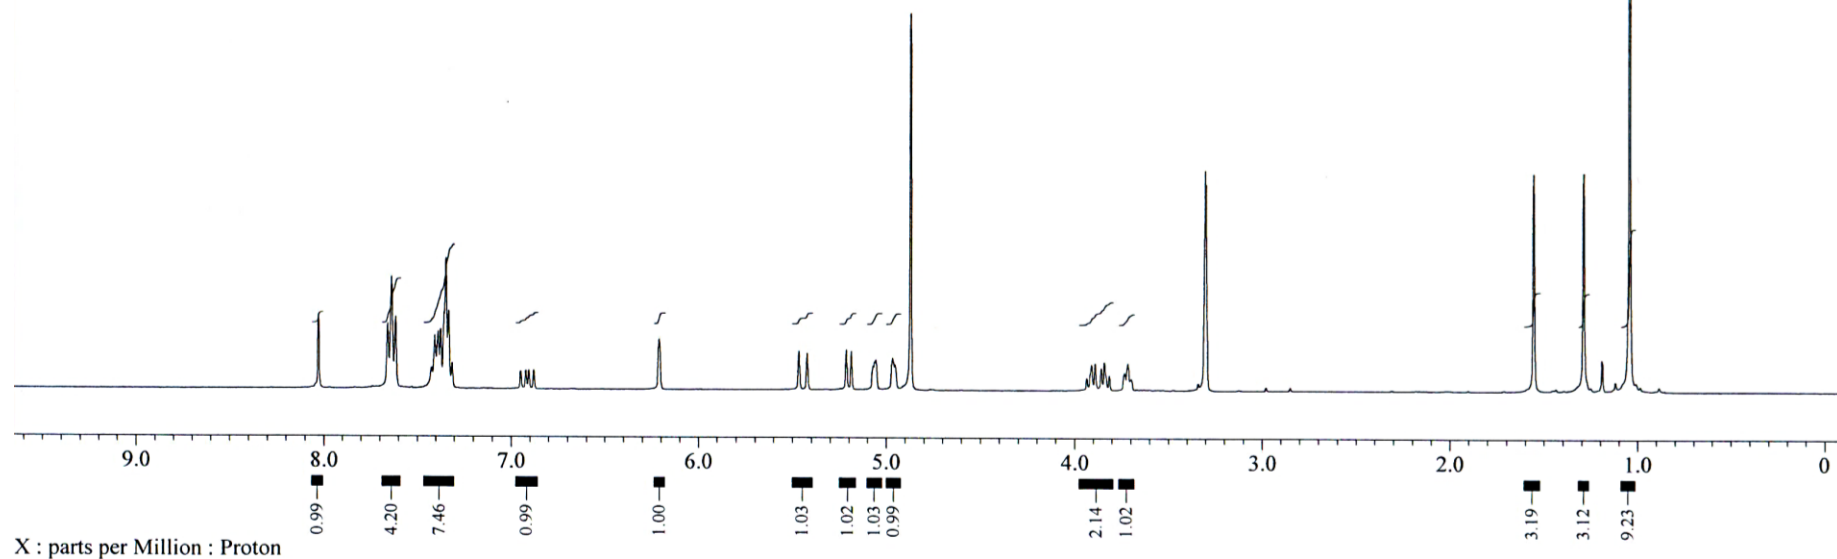

X : parts per Million : Proton

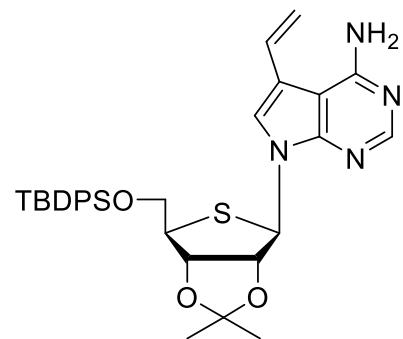**12c** $^{13}\text{C}$  NMR (100 MHz,  $\text{CD}_3\text{OD}$ )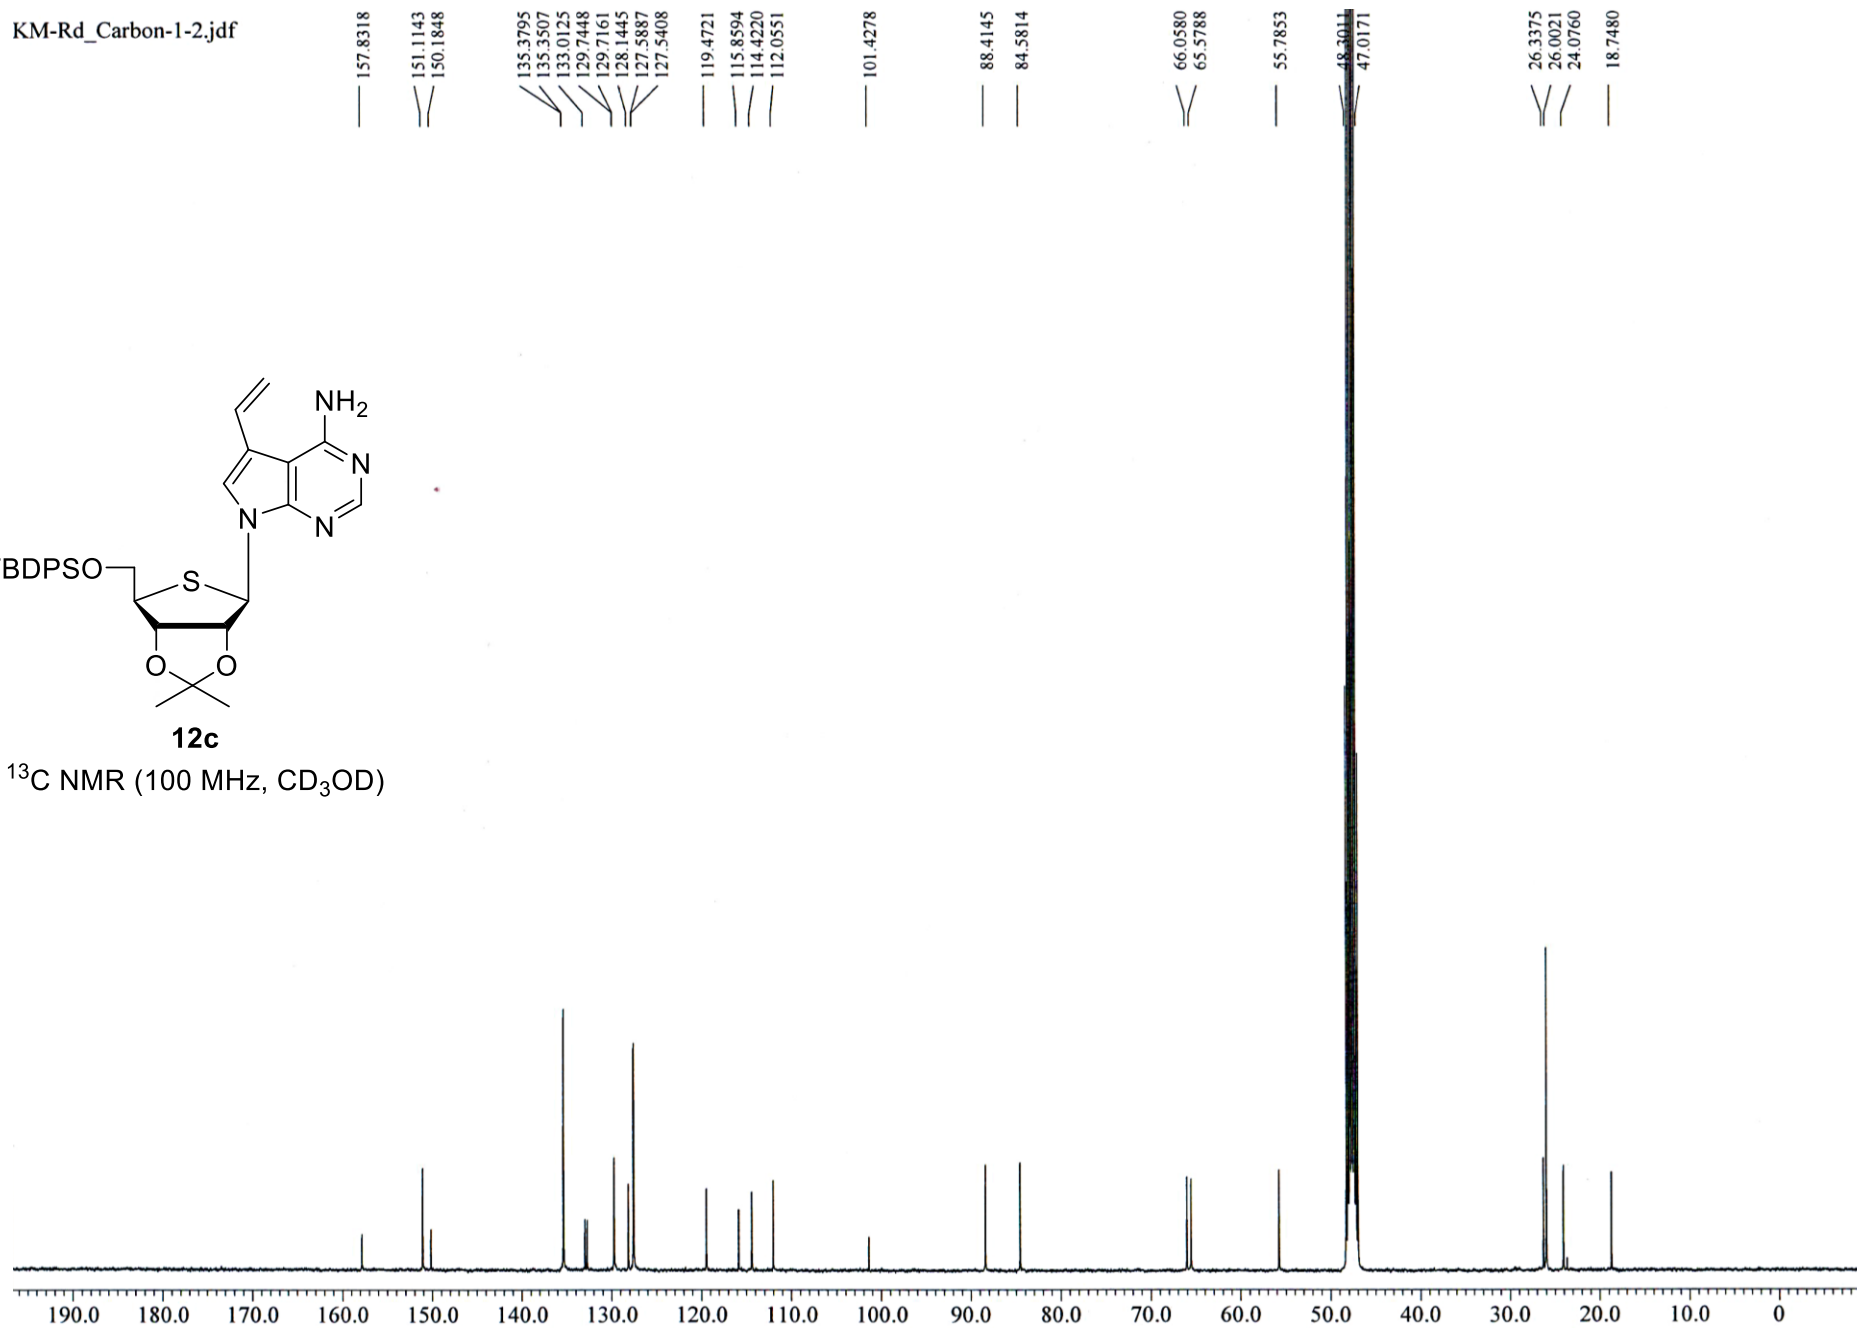

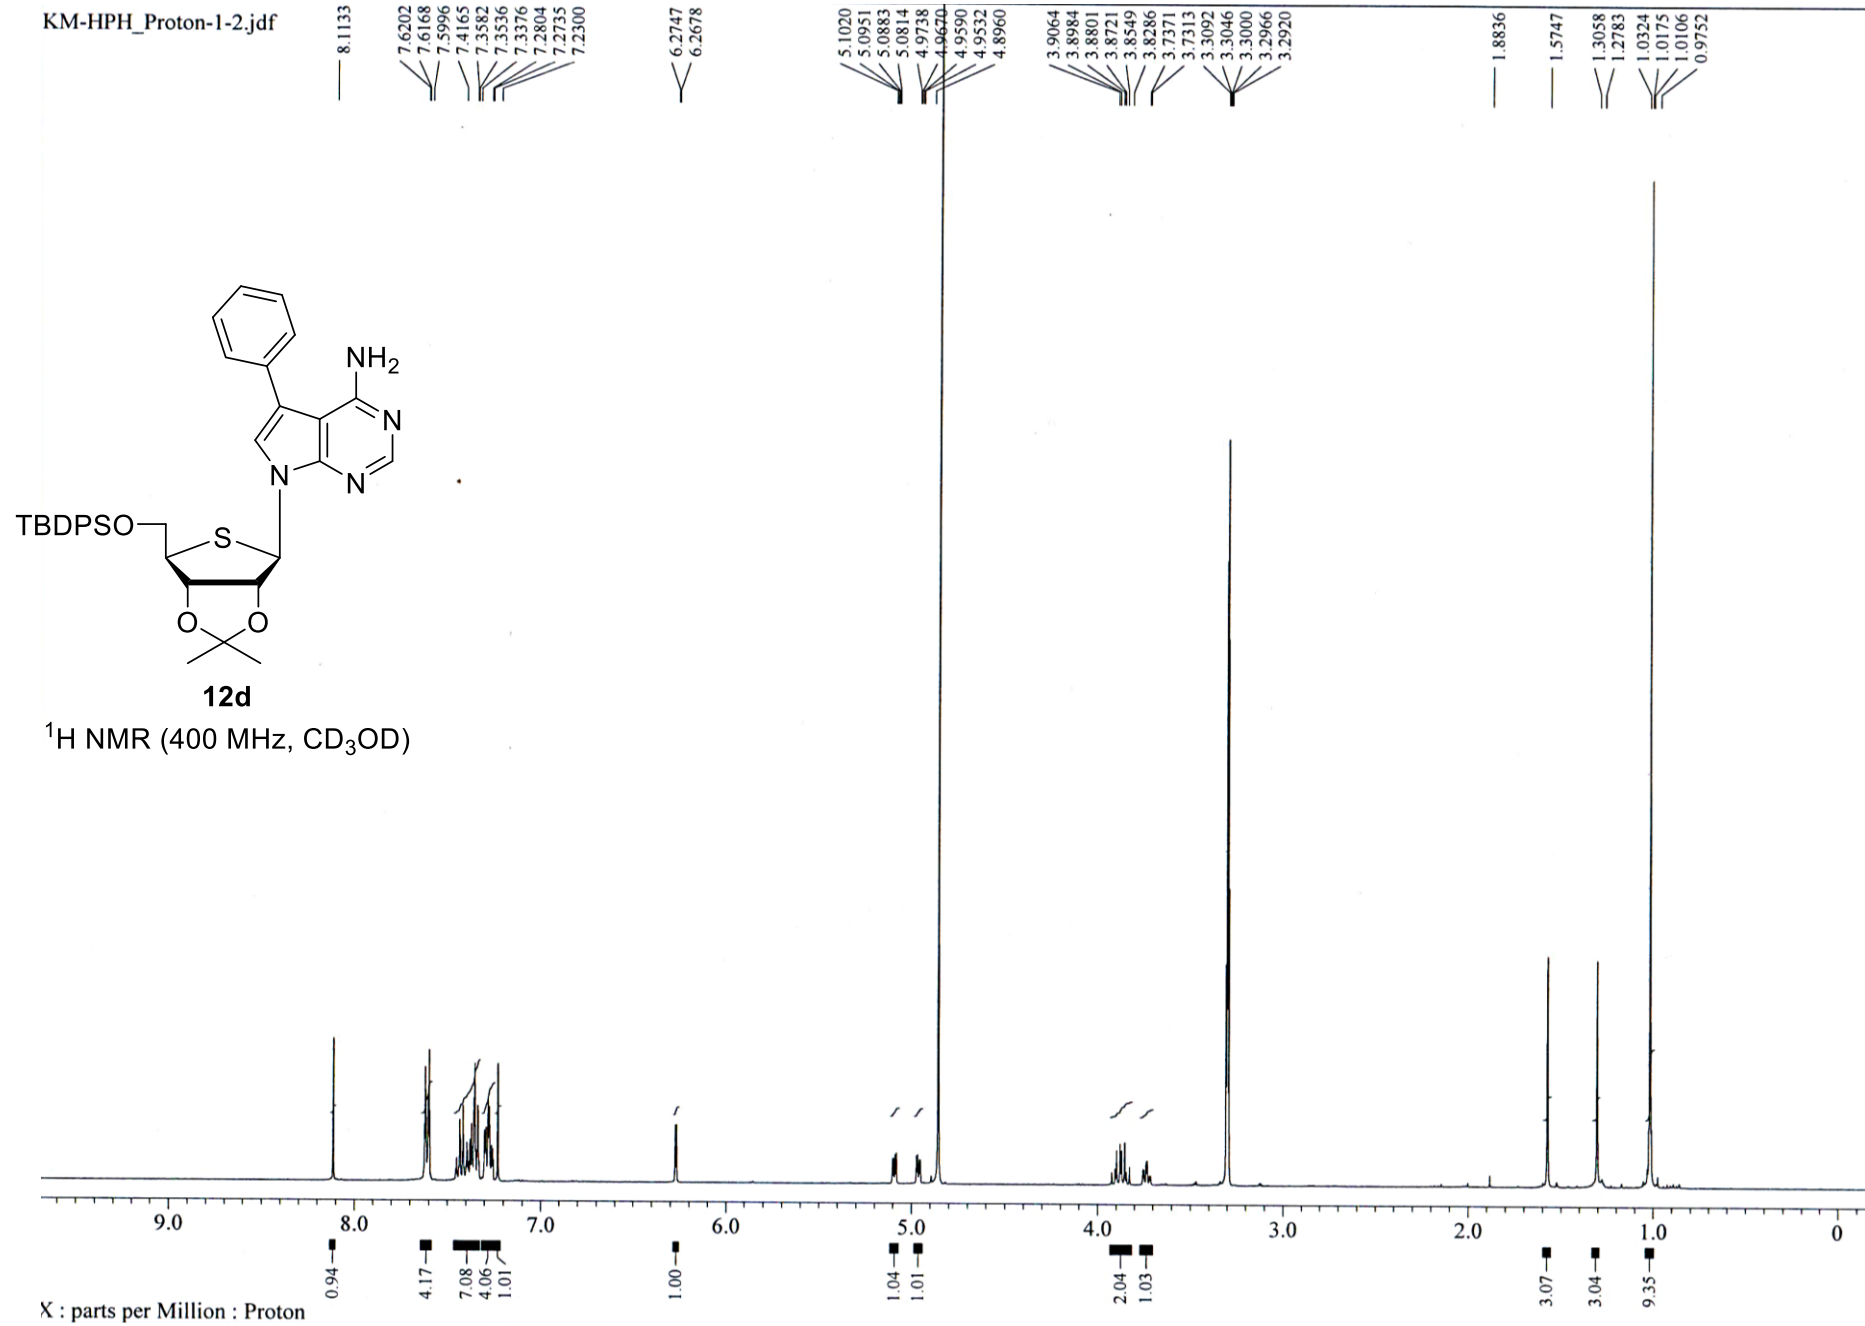

KM-SPhy\_Carbon-1-2.jdf

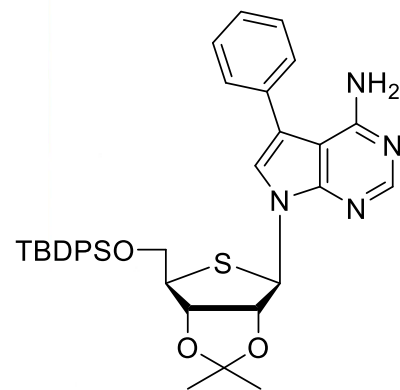

**12d**

$^{13}\text{C}$  NMR (100 MHz,  $\text{CD}_3\text{OD}$ )

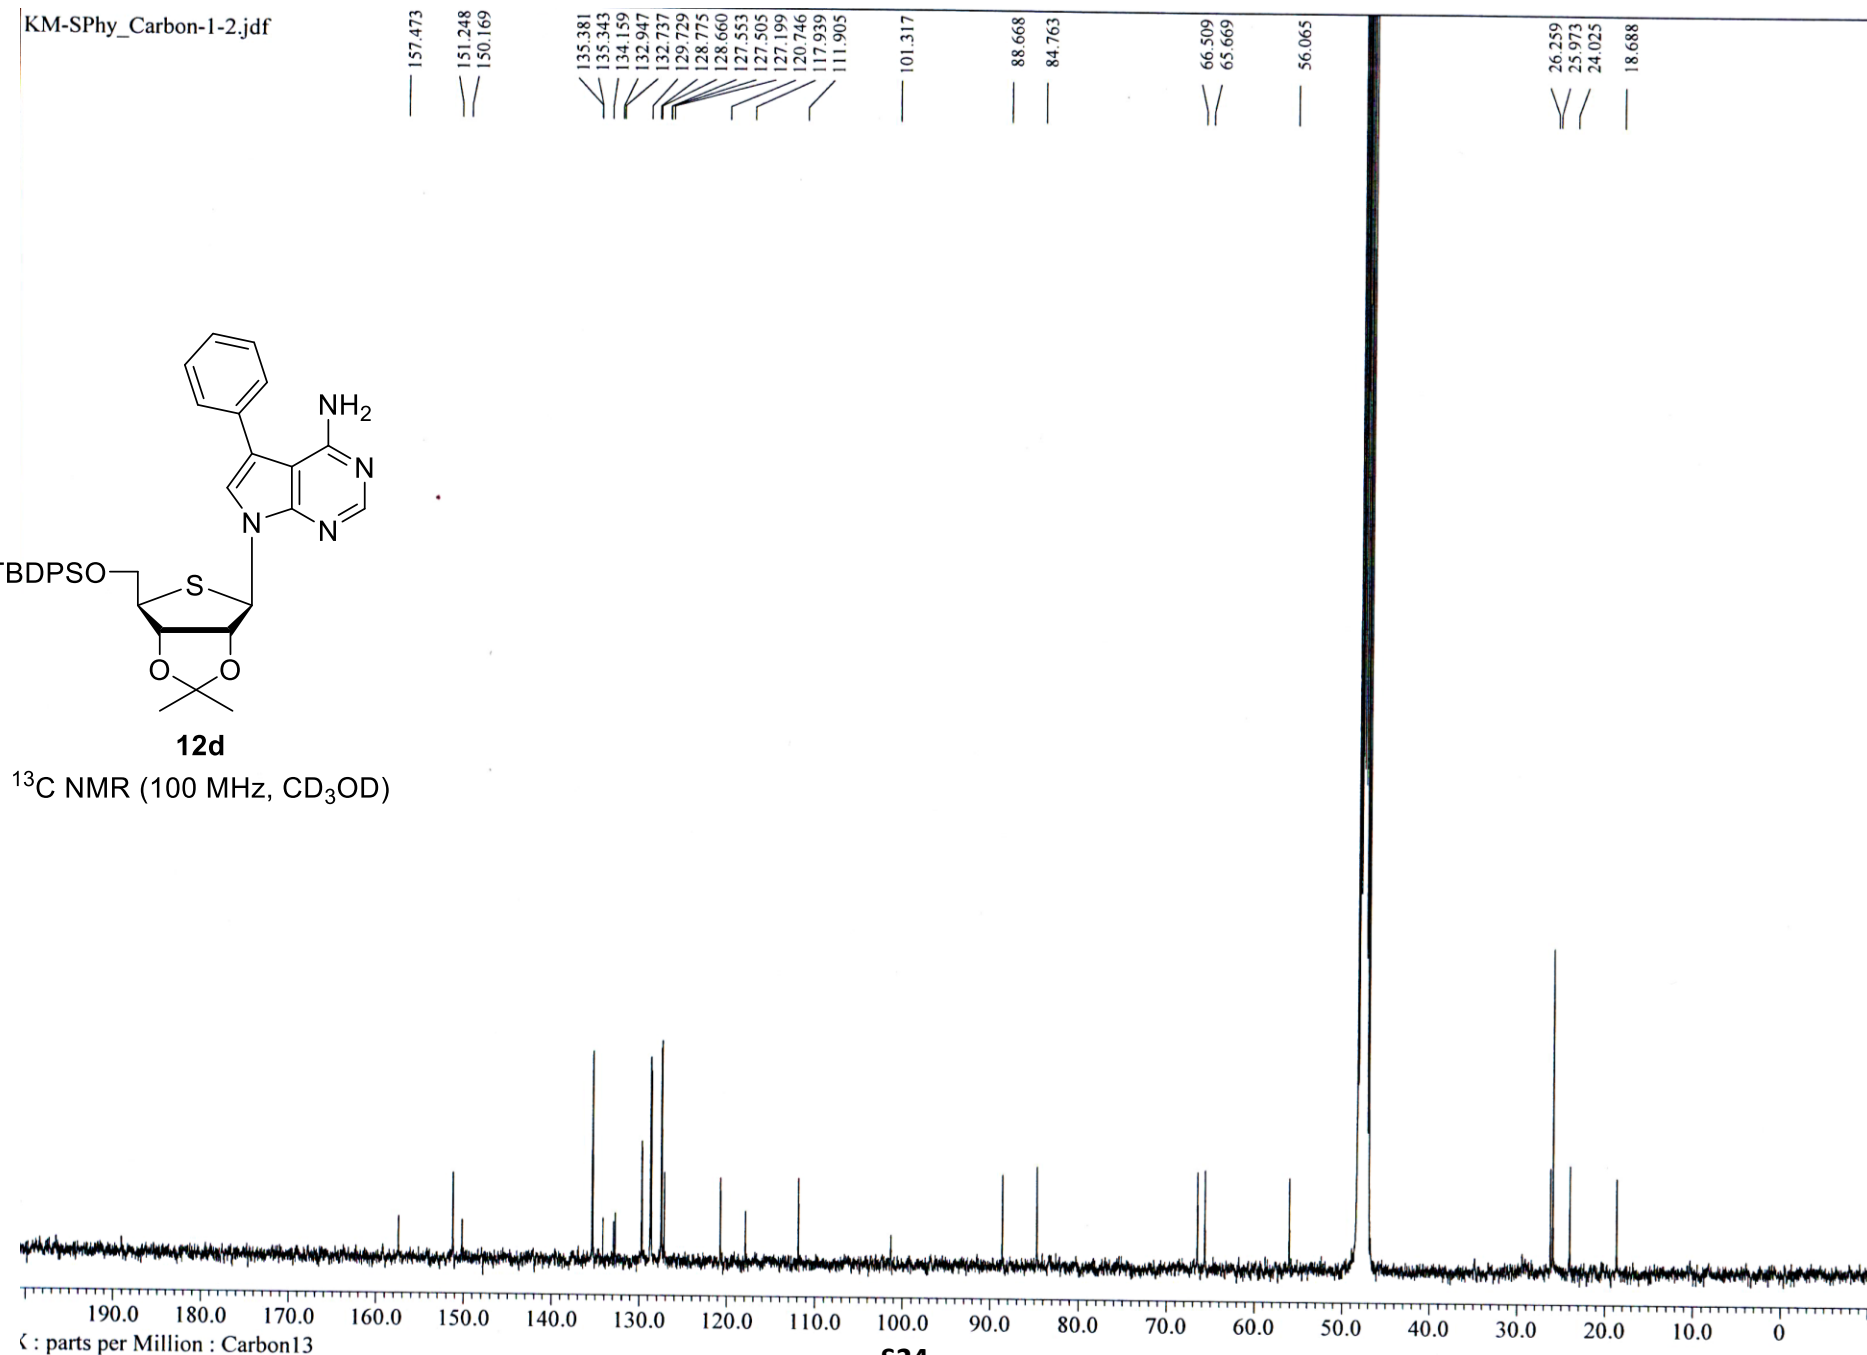

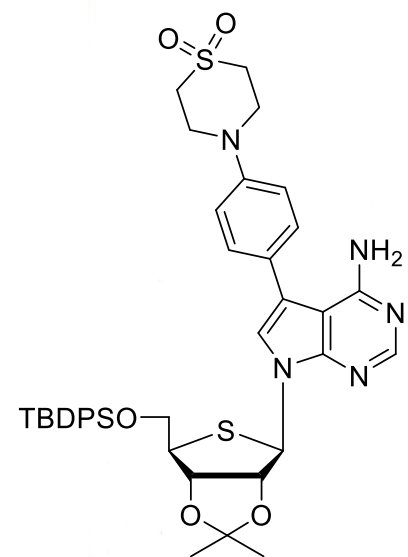

**12e**

$^1\text{H}$  NMR (400 MHz,  $\text{CDCl}_3$ )

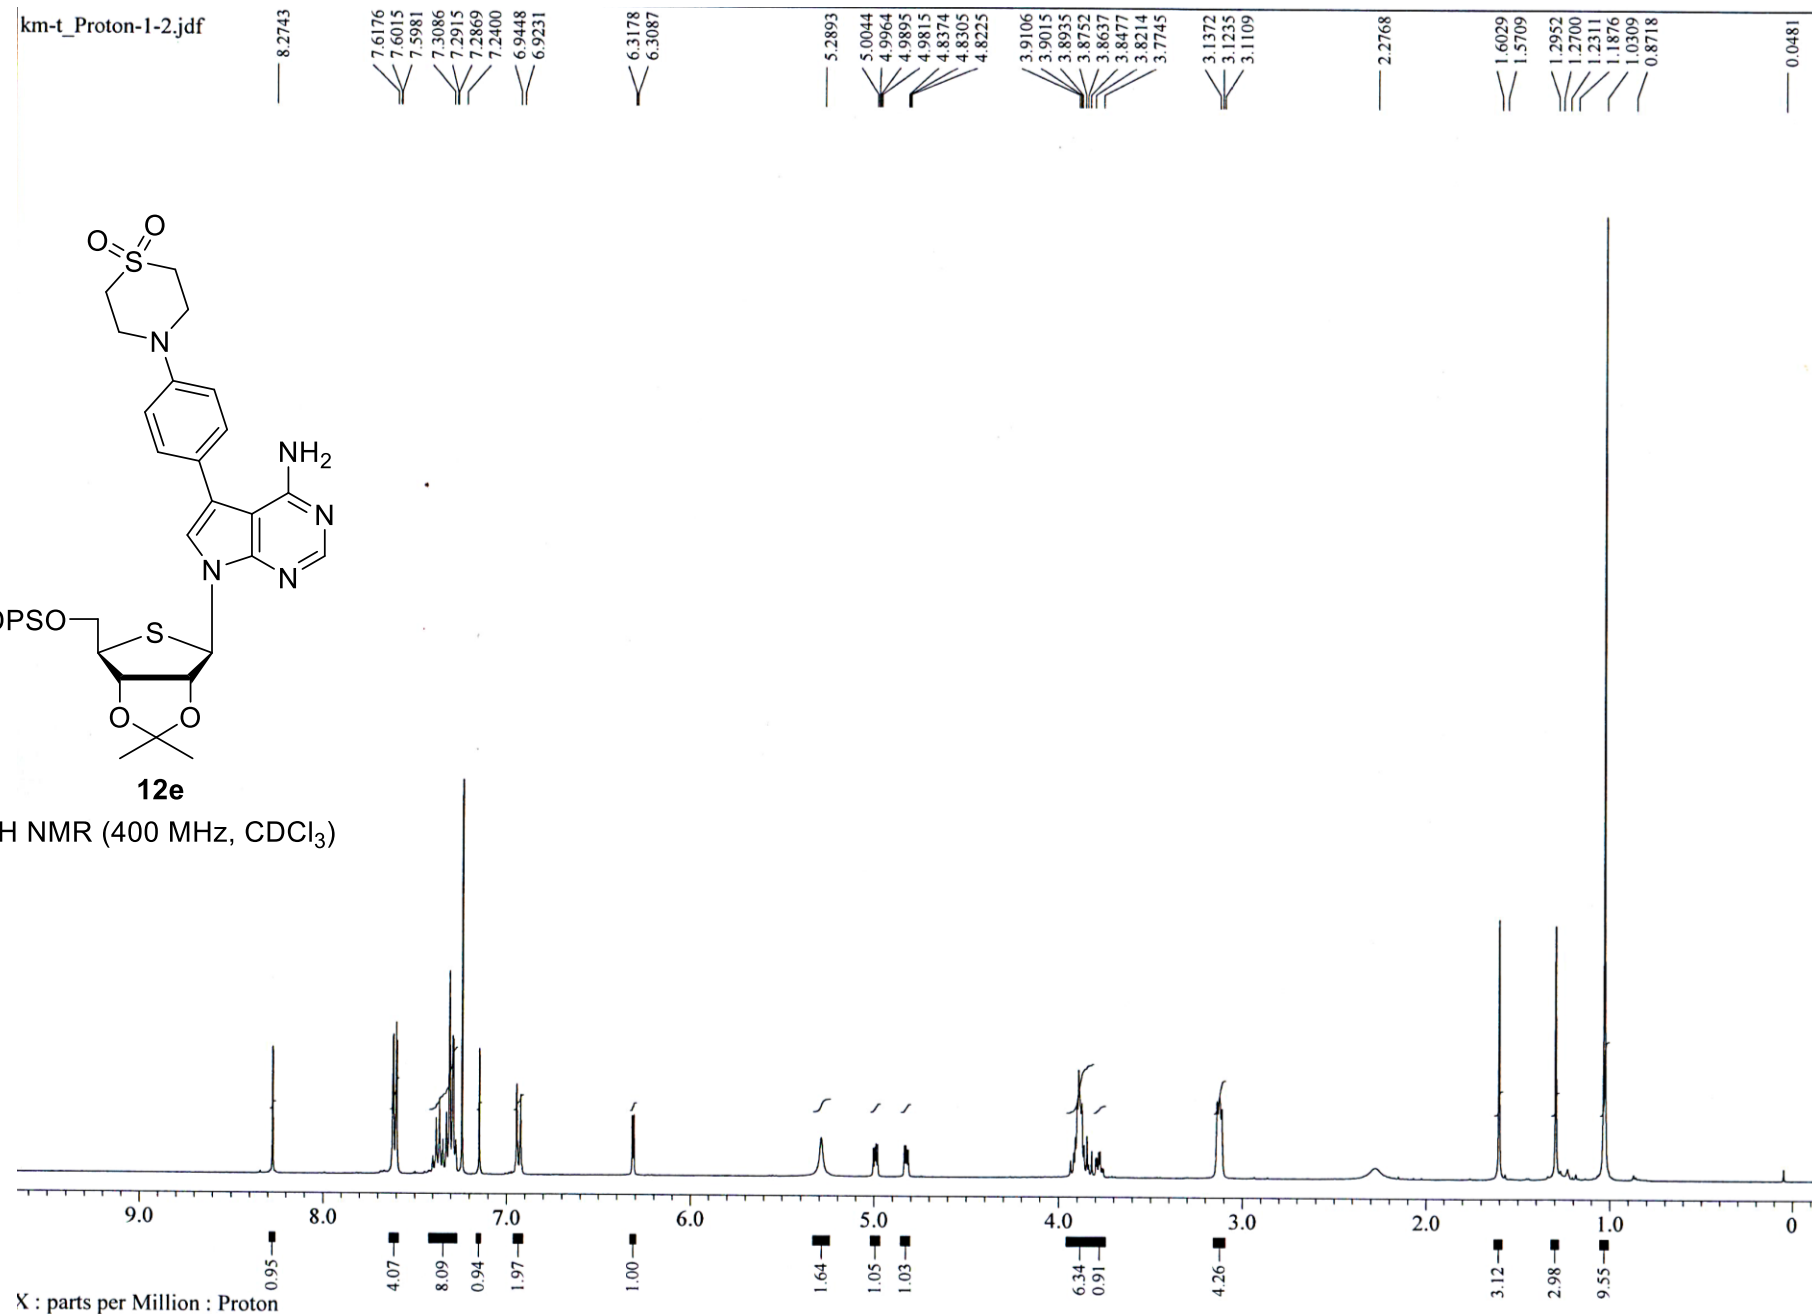

Carbon-1-2.jdf

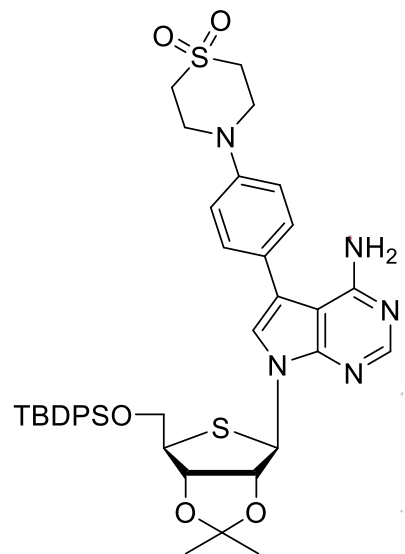

**12e**

$^{13}\text{C}$  NMR (100 MHz,  $\text{CDCl}_3$ )

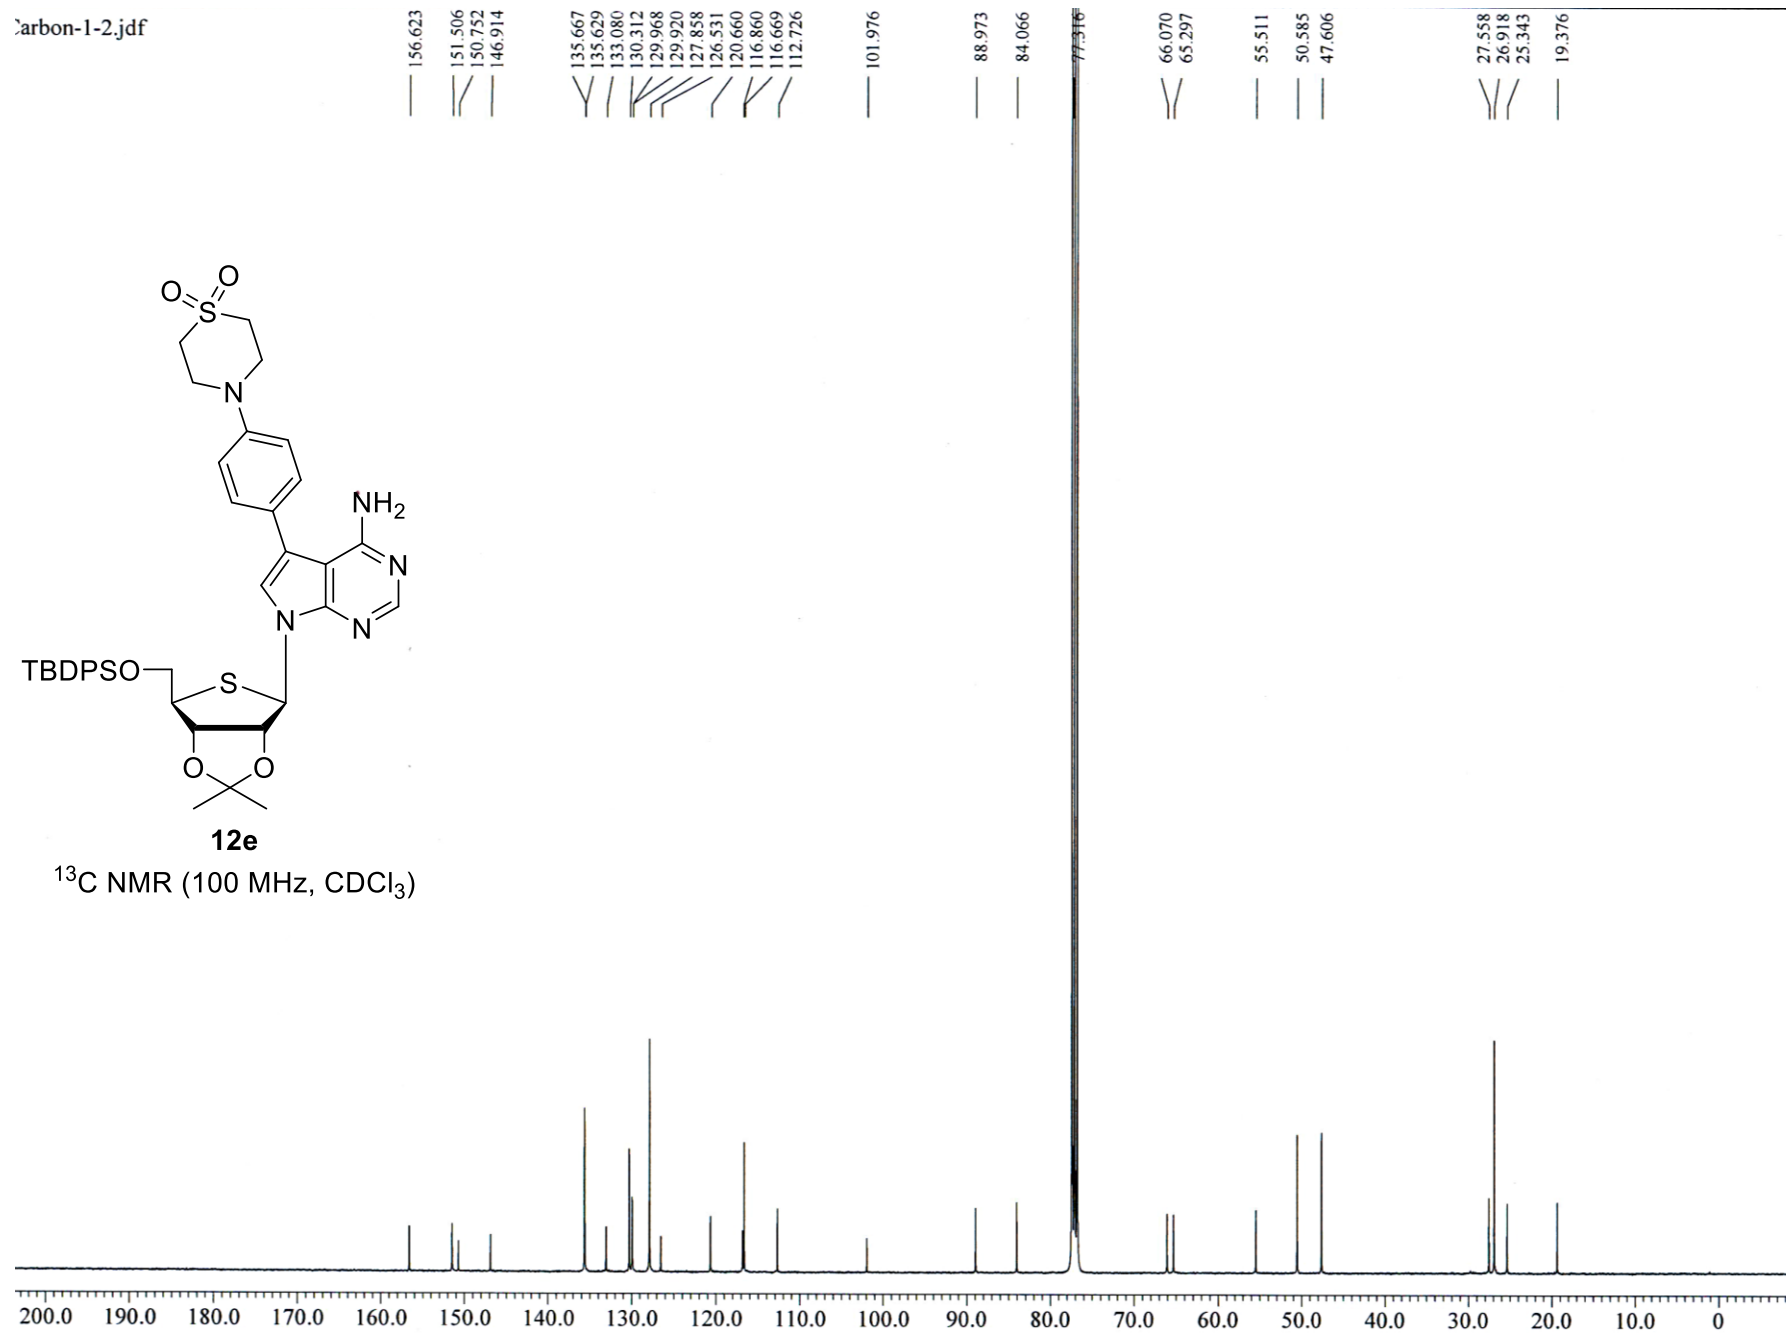

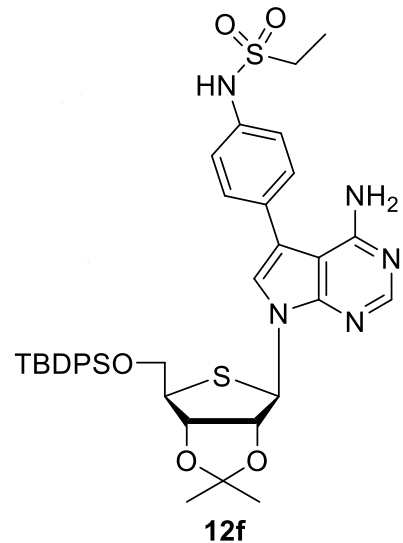

<sup>1</sup>H NMR (500 MHz, CDCl<sub>3</sub>)

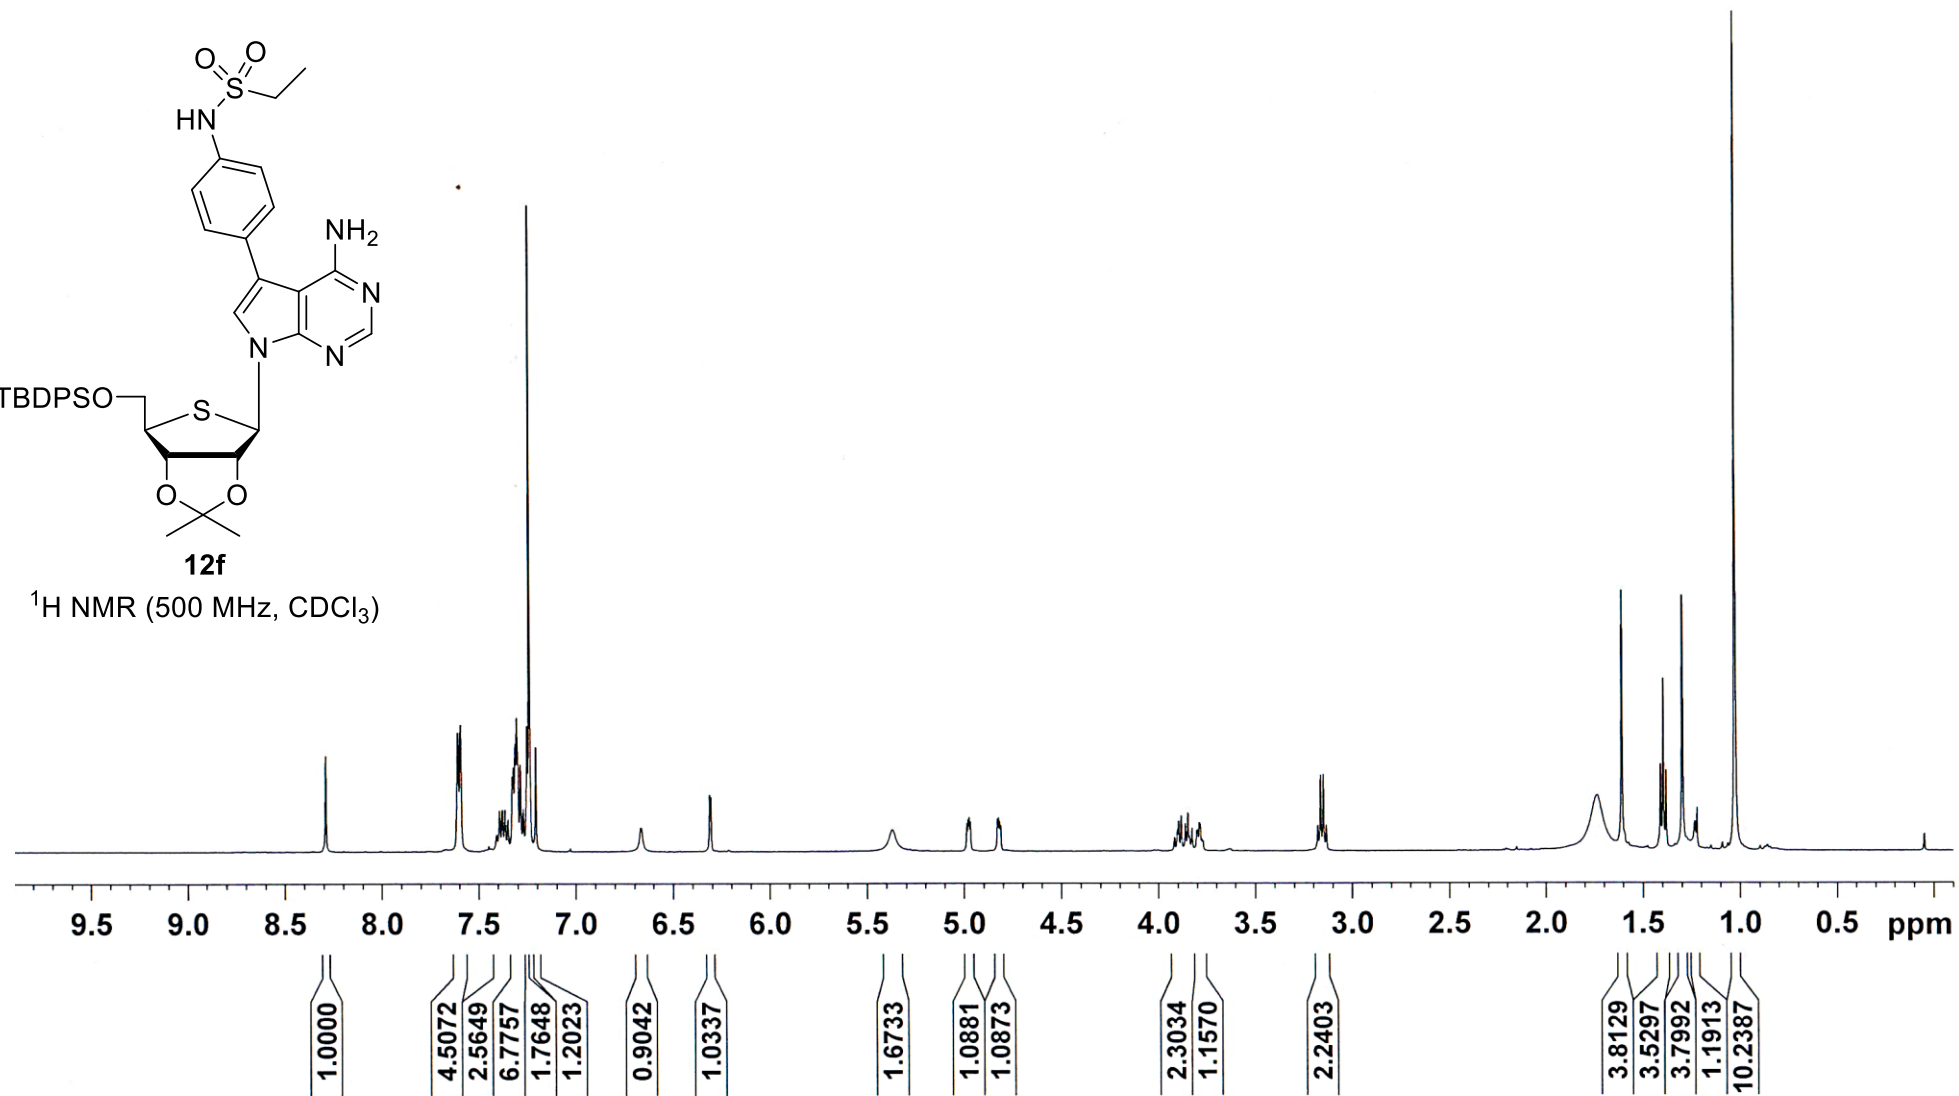

bon-1-2.jdf

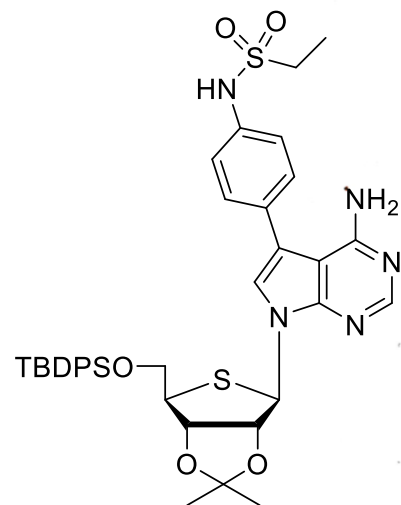

**12f**

$^{13}\text{C}$  NMR (100 MHz,  $\text{CDCl}_3$ )

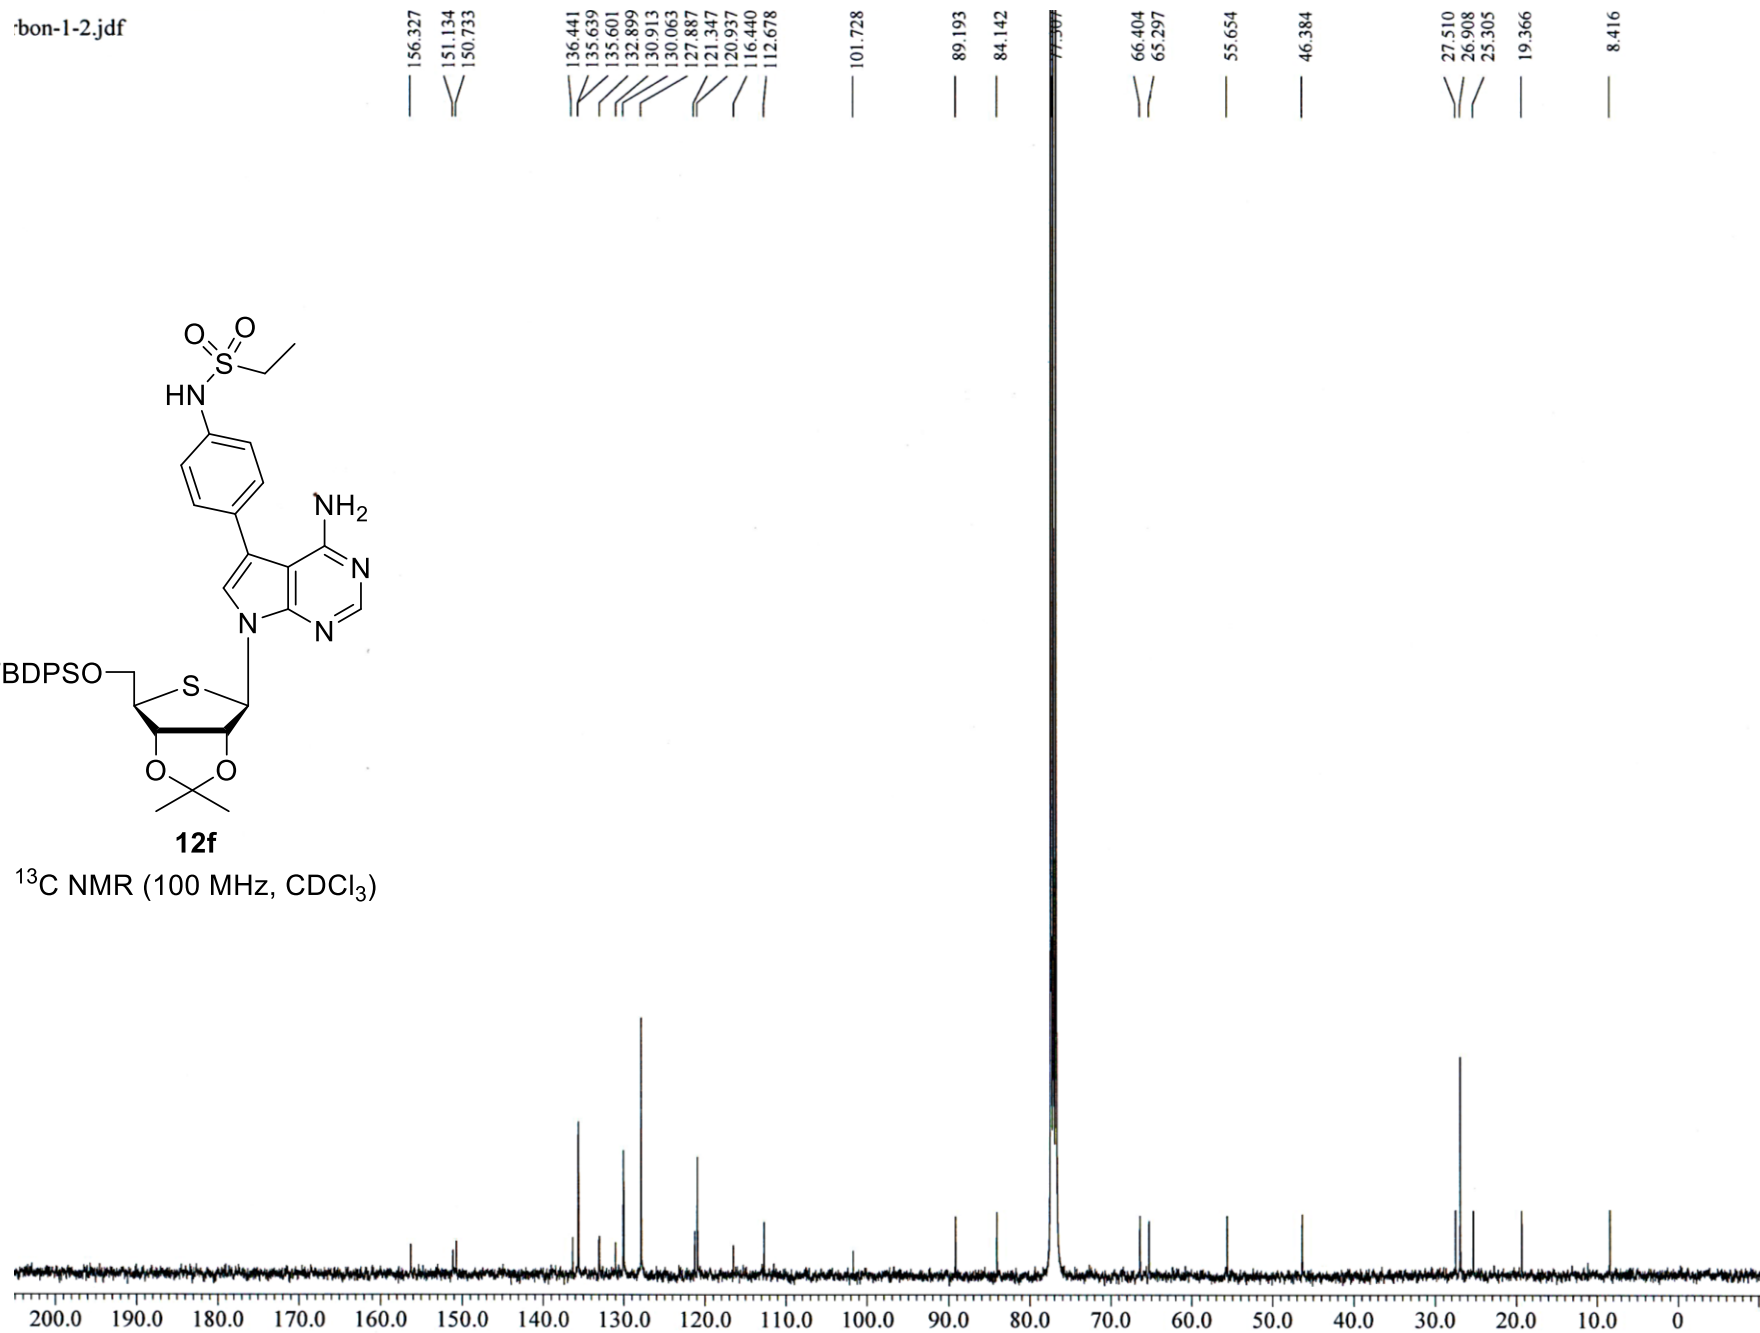



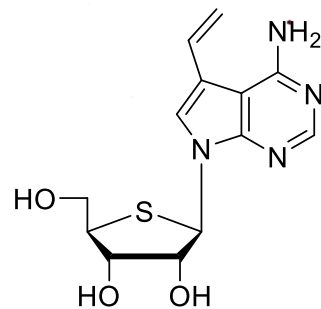

**1c**

$^1\text{H}$  NMR (500 MHz,  $\text{DMSO}-d_6$ )

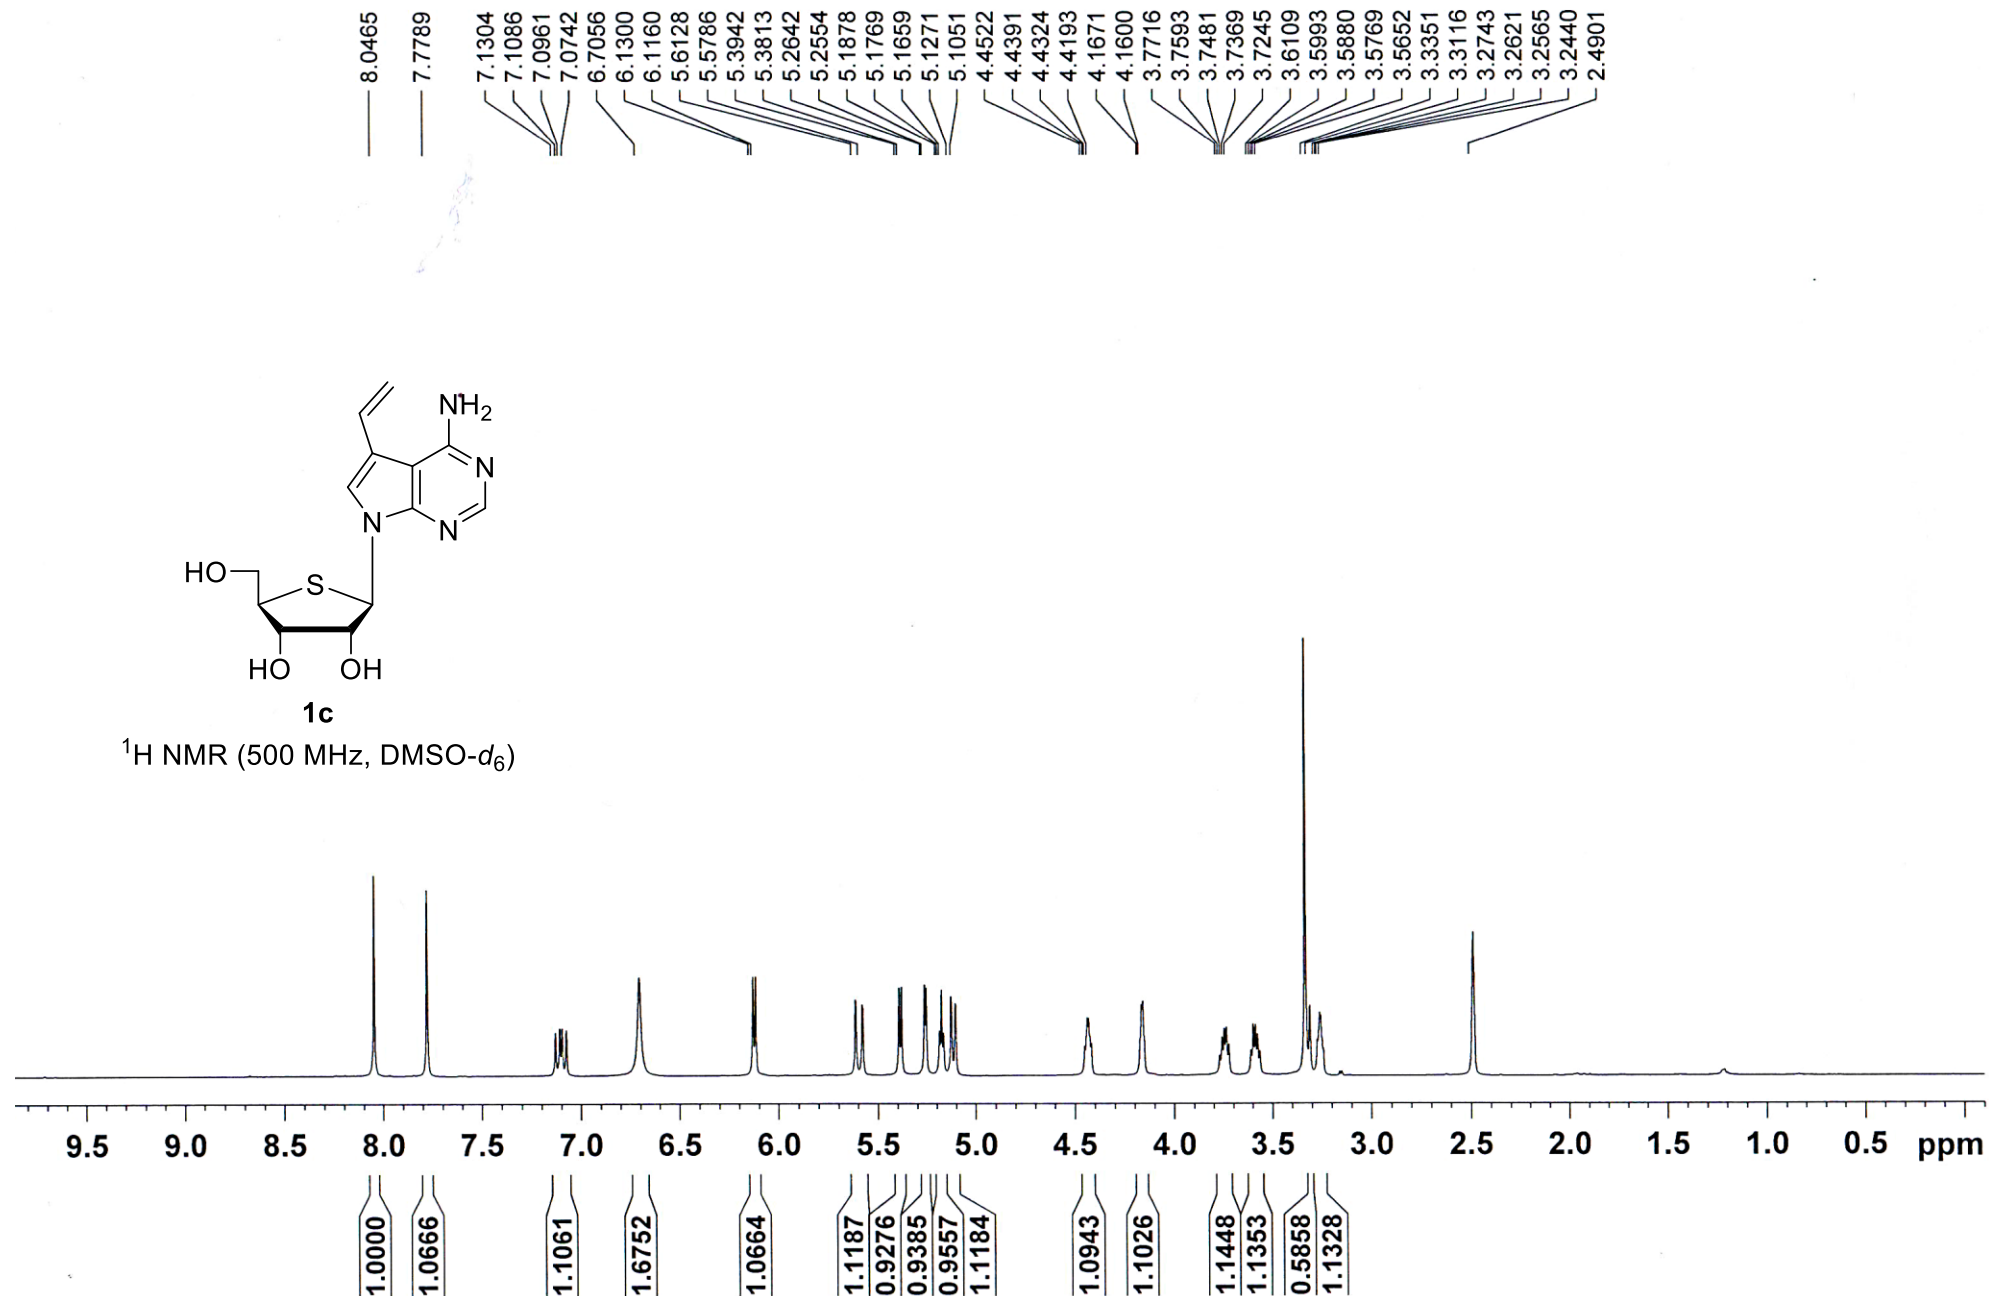

-DNMR\_Proton-1-2.jdf

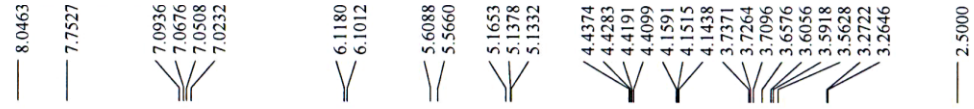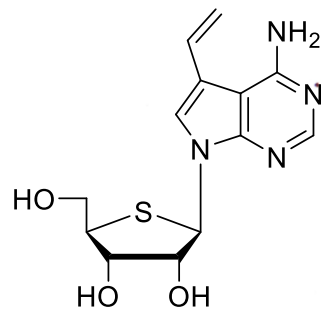

**1c**

<sup>1</sup>H NMR (400 MHz, DMSO-*d*<sub>6</sub> + D<sub>2</sub>O)

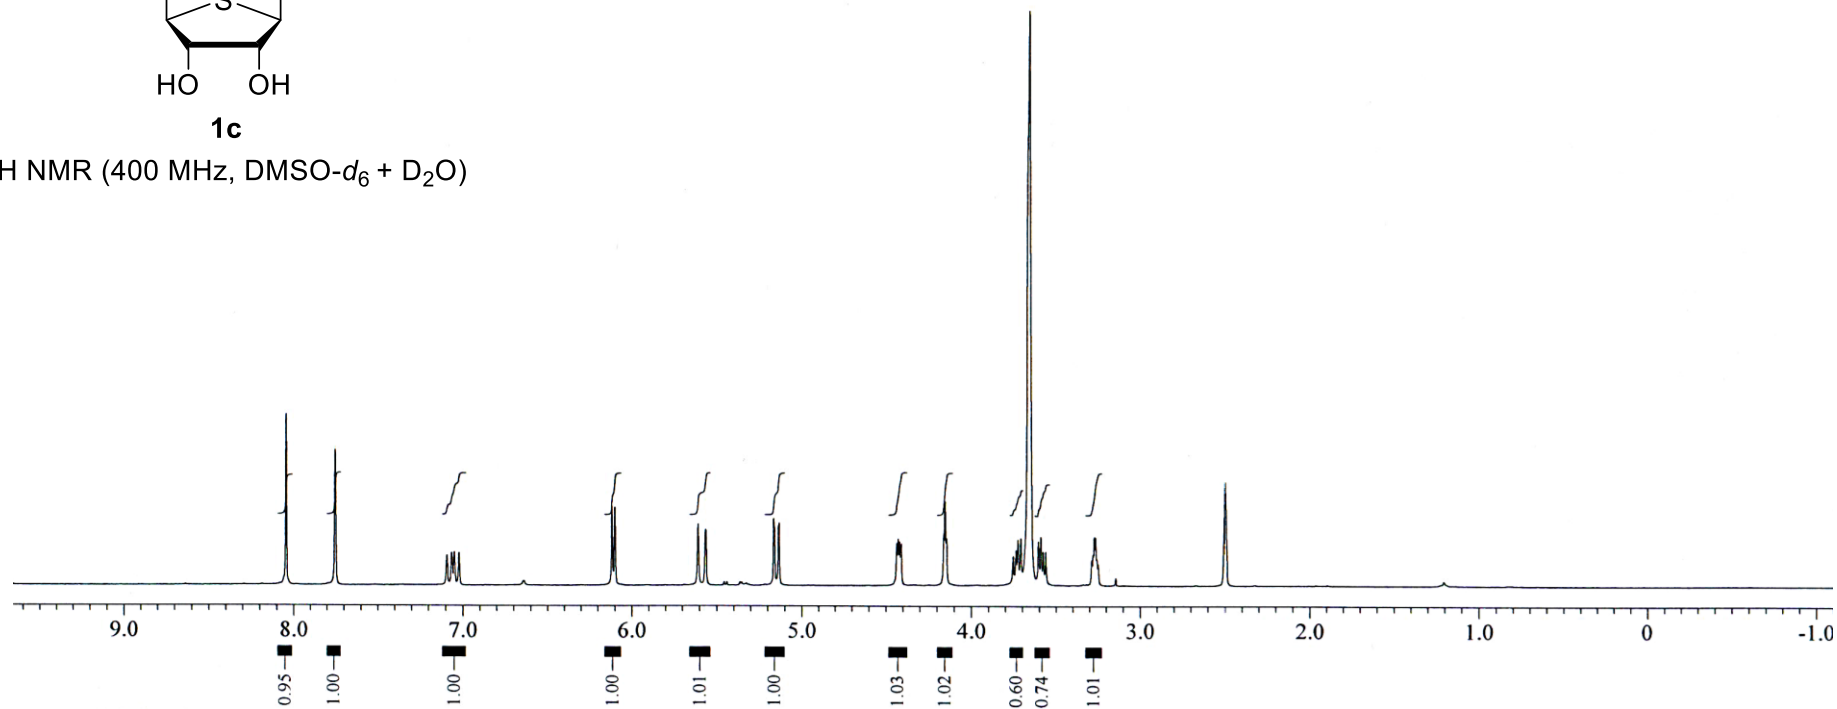

Carbon-1-2.jdf

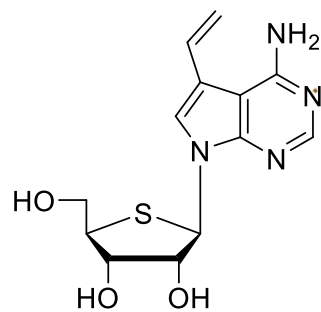

**1c**

$^{13}\text{C}$  NMR (100 MHz,  $\text{CD}_3\text{OD}$ )

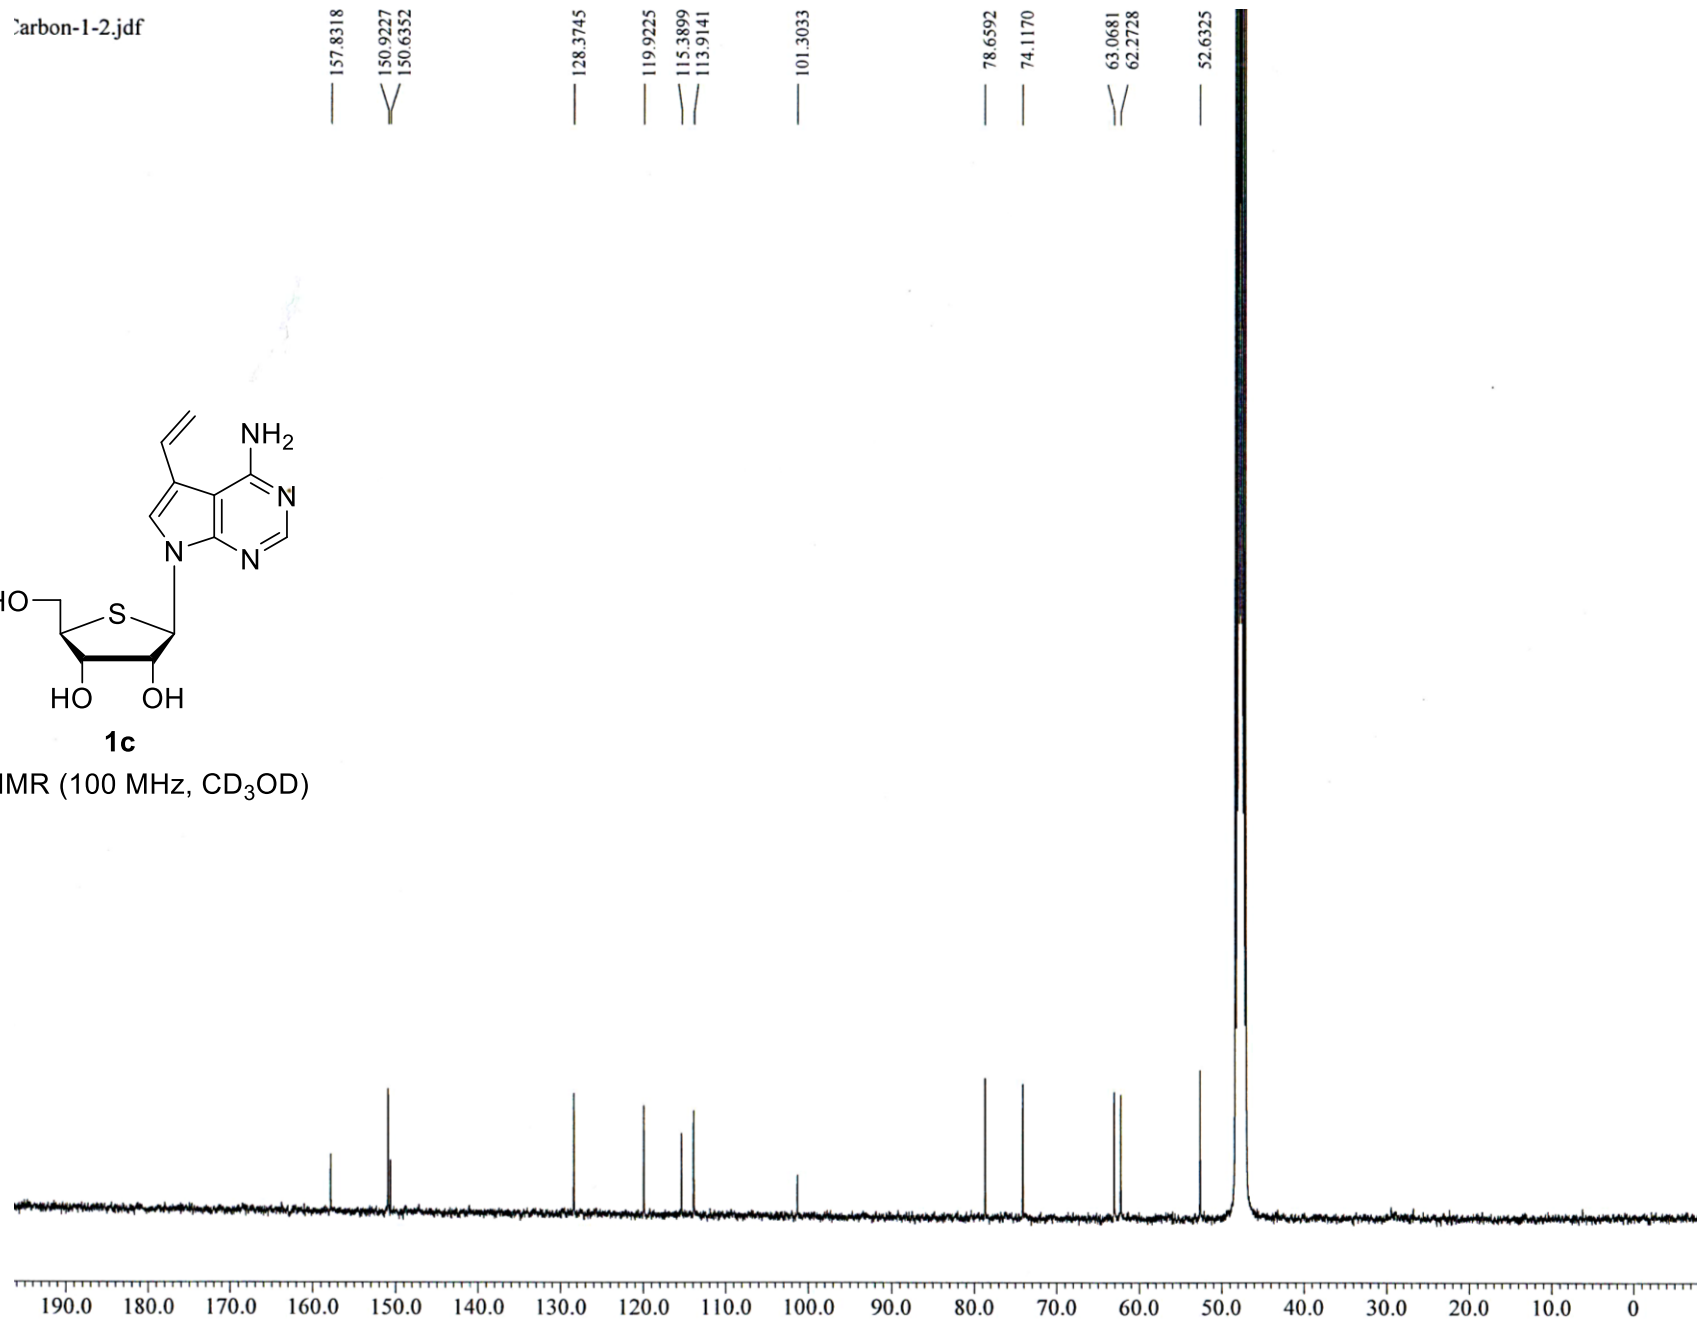

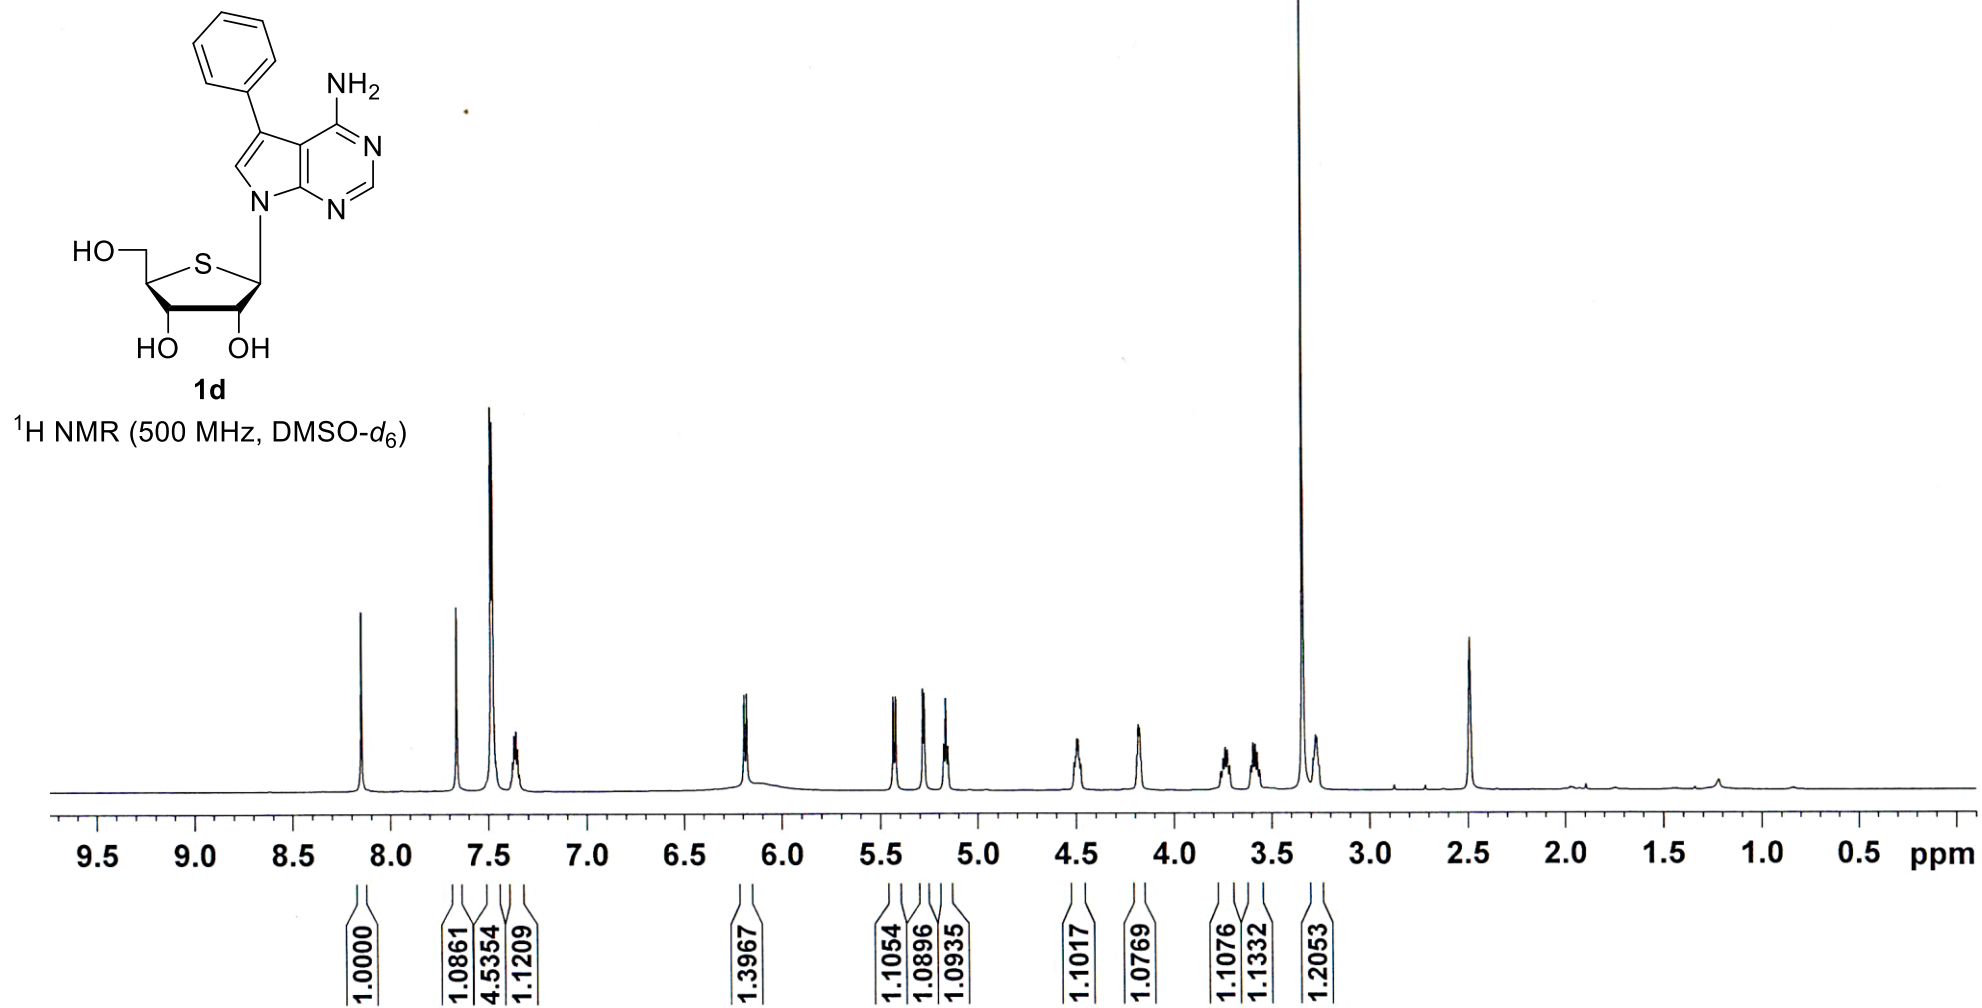

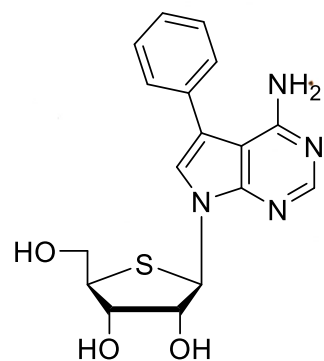

**1d**

$^{13}\text{C}$  NMR (125 MHz,  $\text{CD}_3\text{OD}$ )

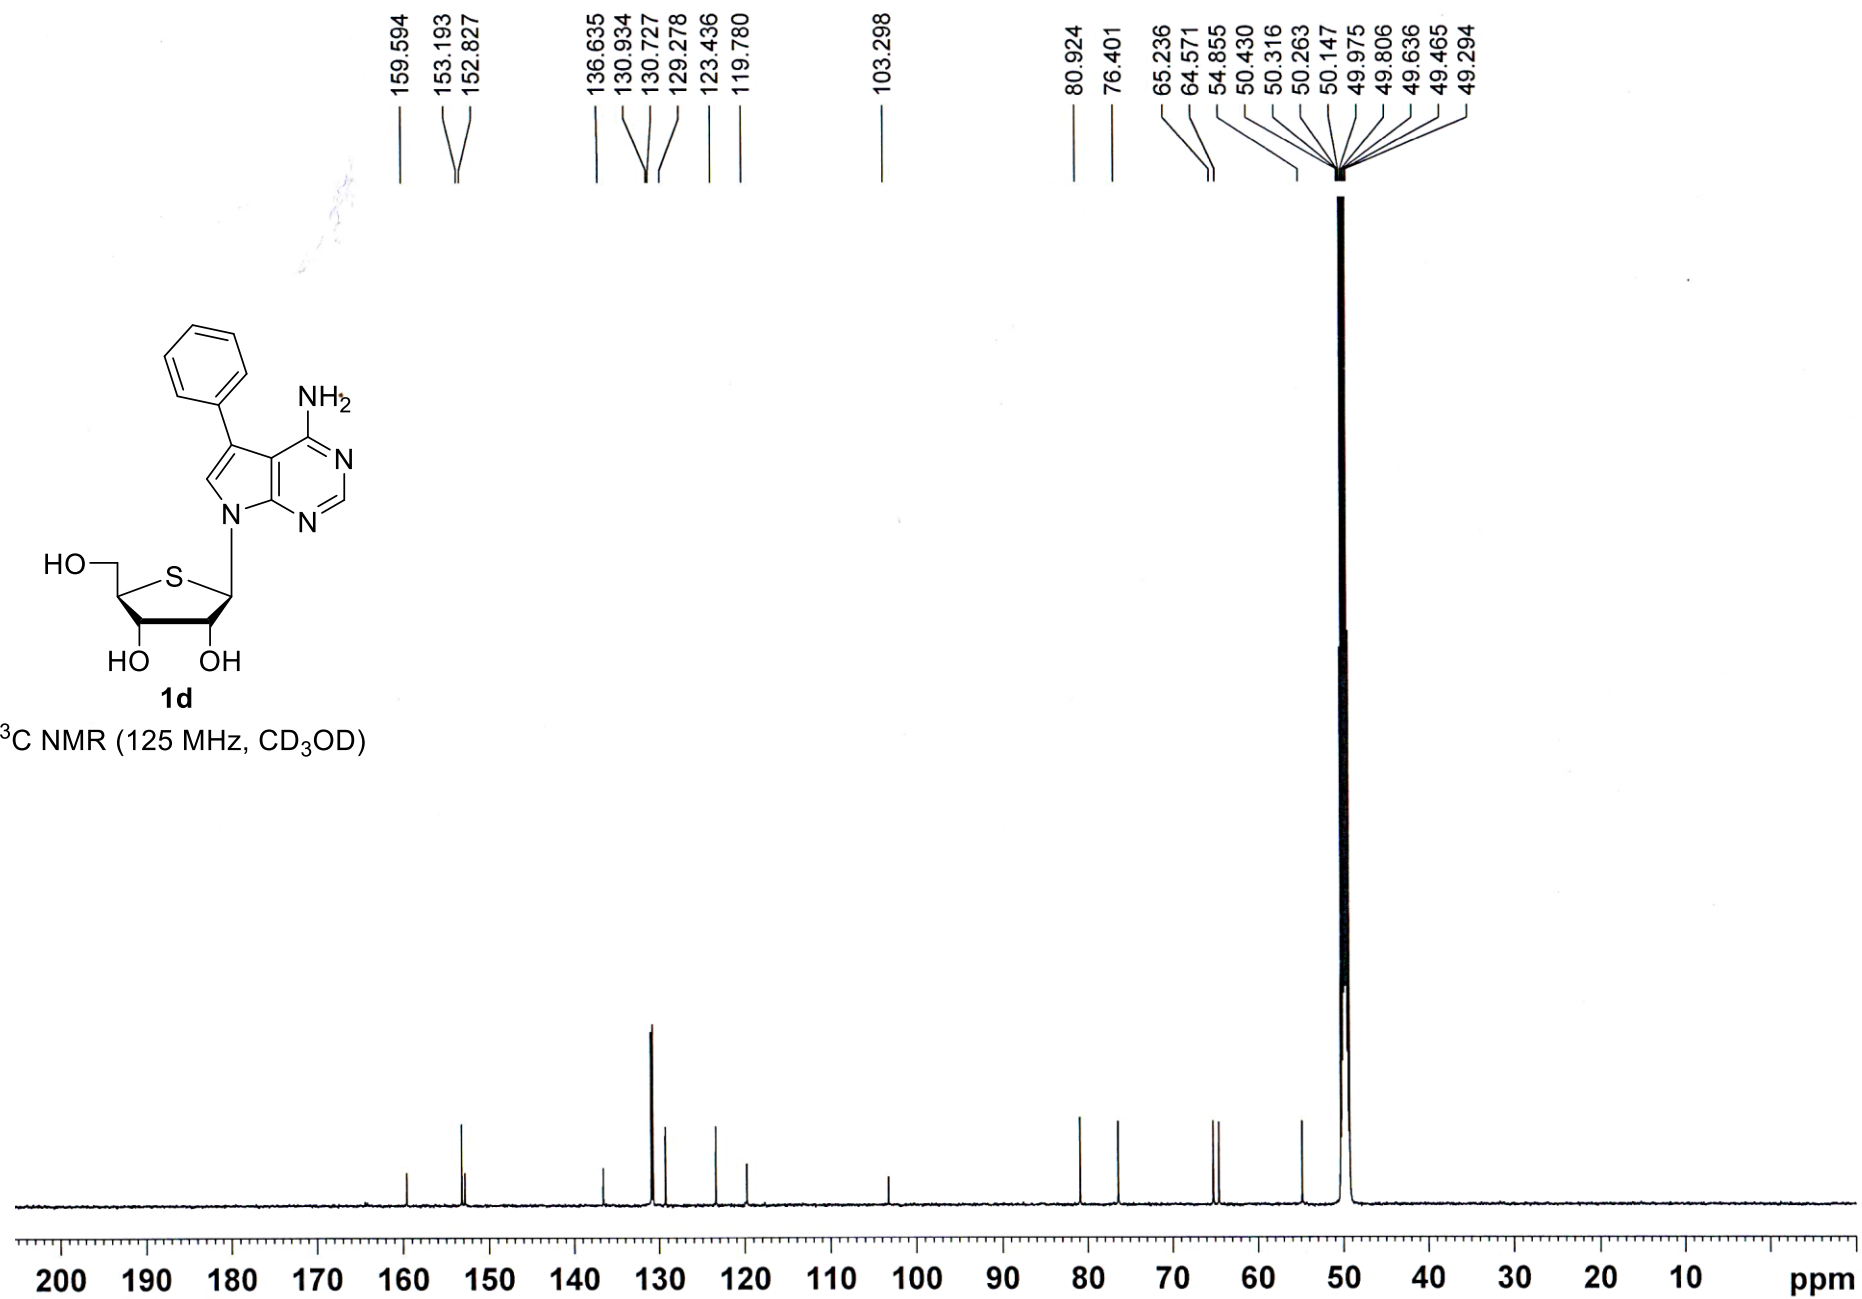

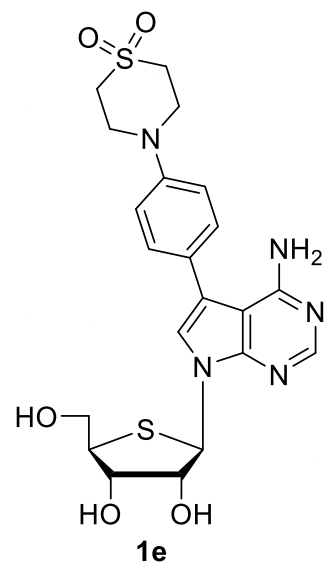

$^1\text{H}$  NMR (500 MHz,  $\text{DMSO}-d_6$ )

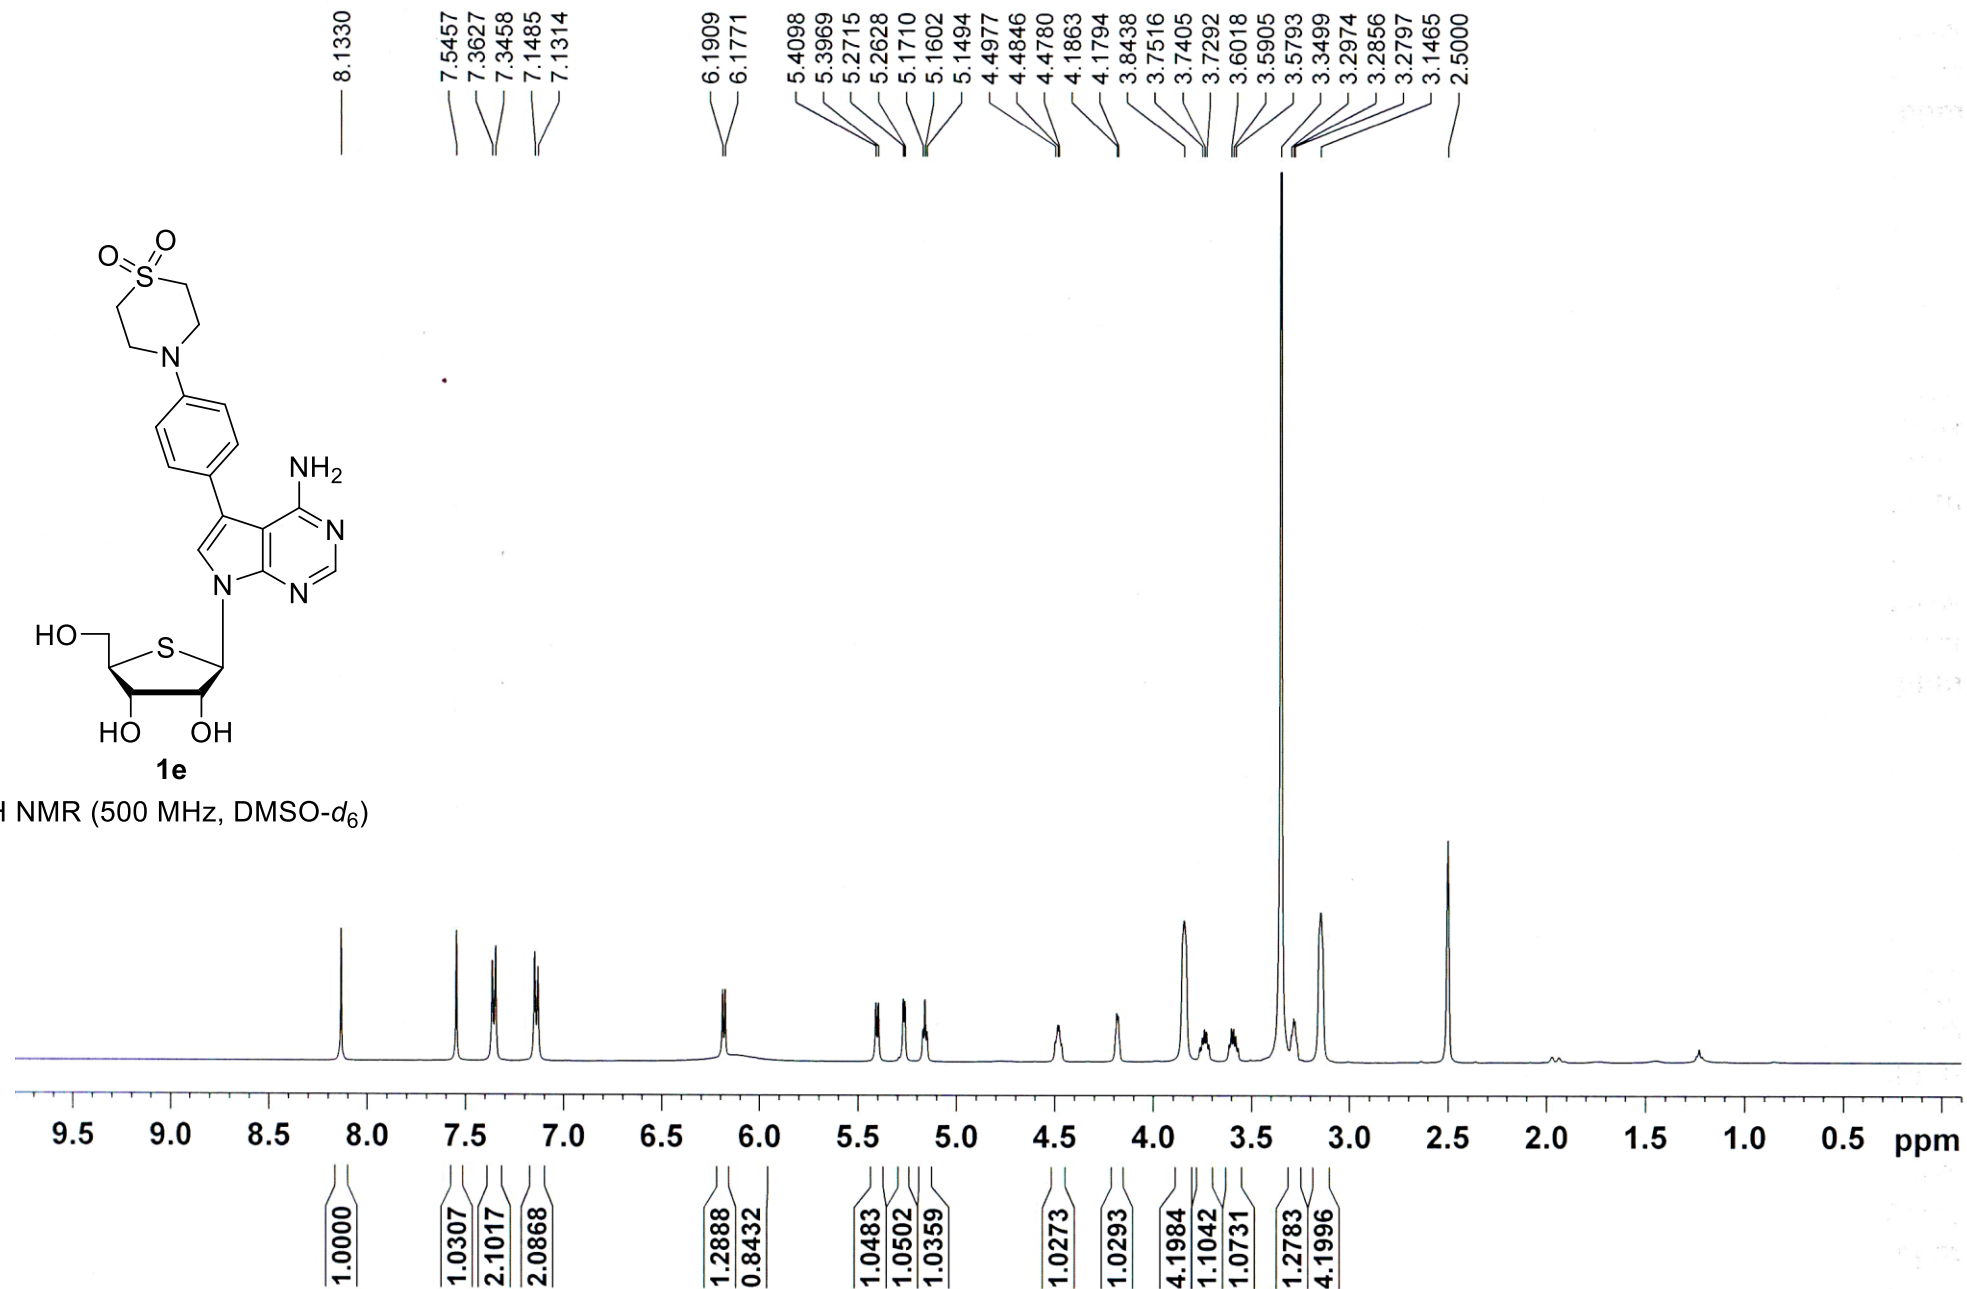

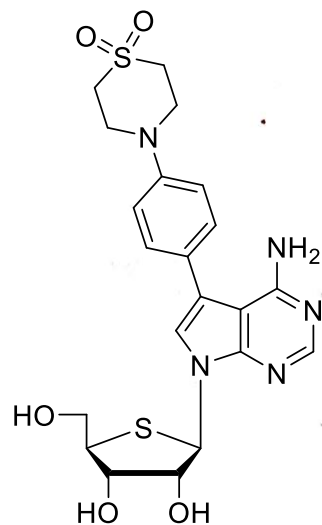

**1e**

$^{13}\text{C}$  NMR (125 MHz,  $\text{DMSO-}d_6$ )

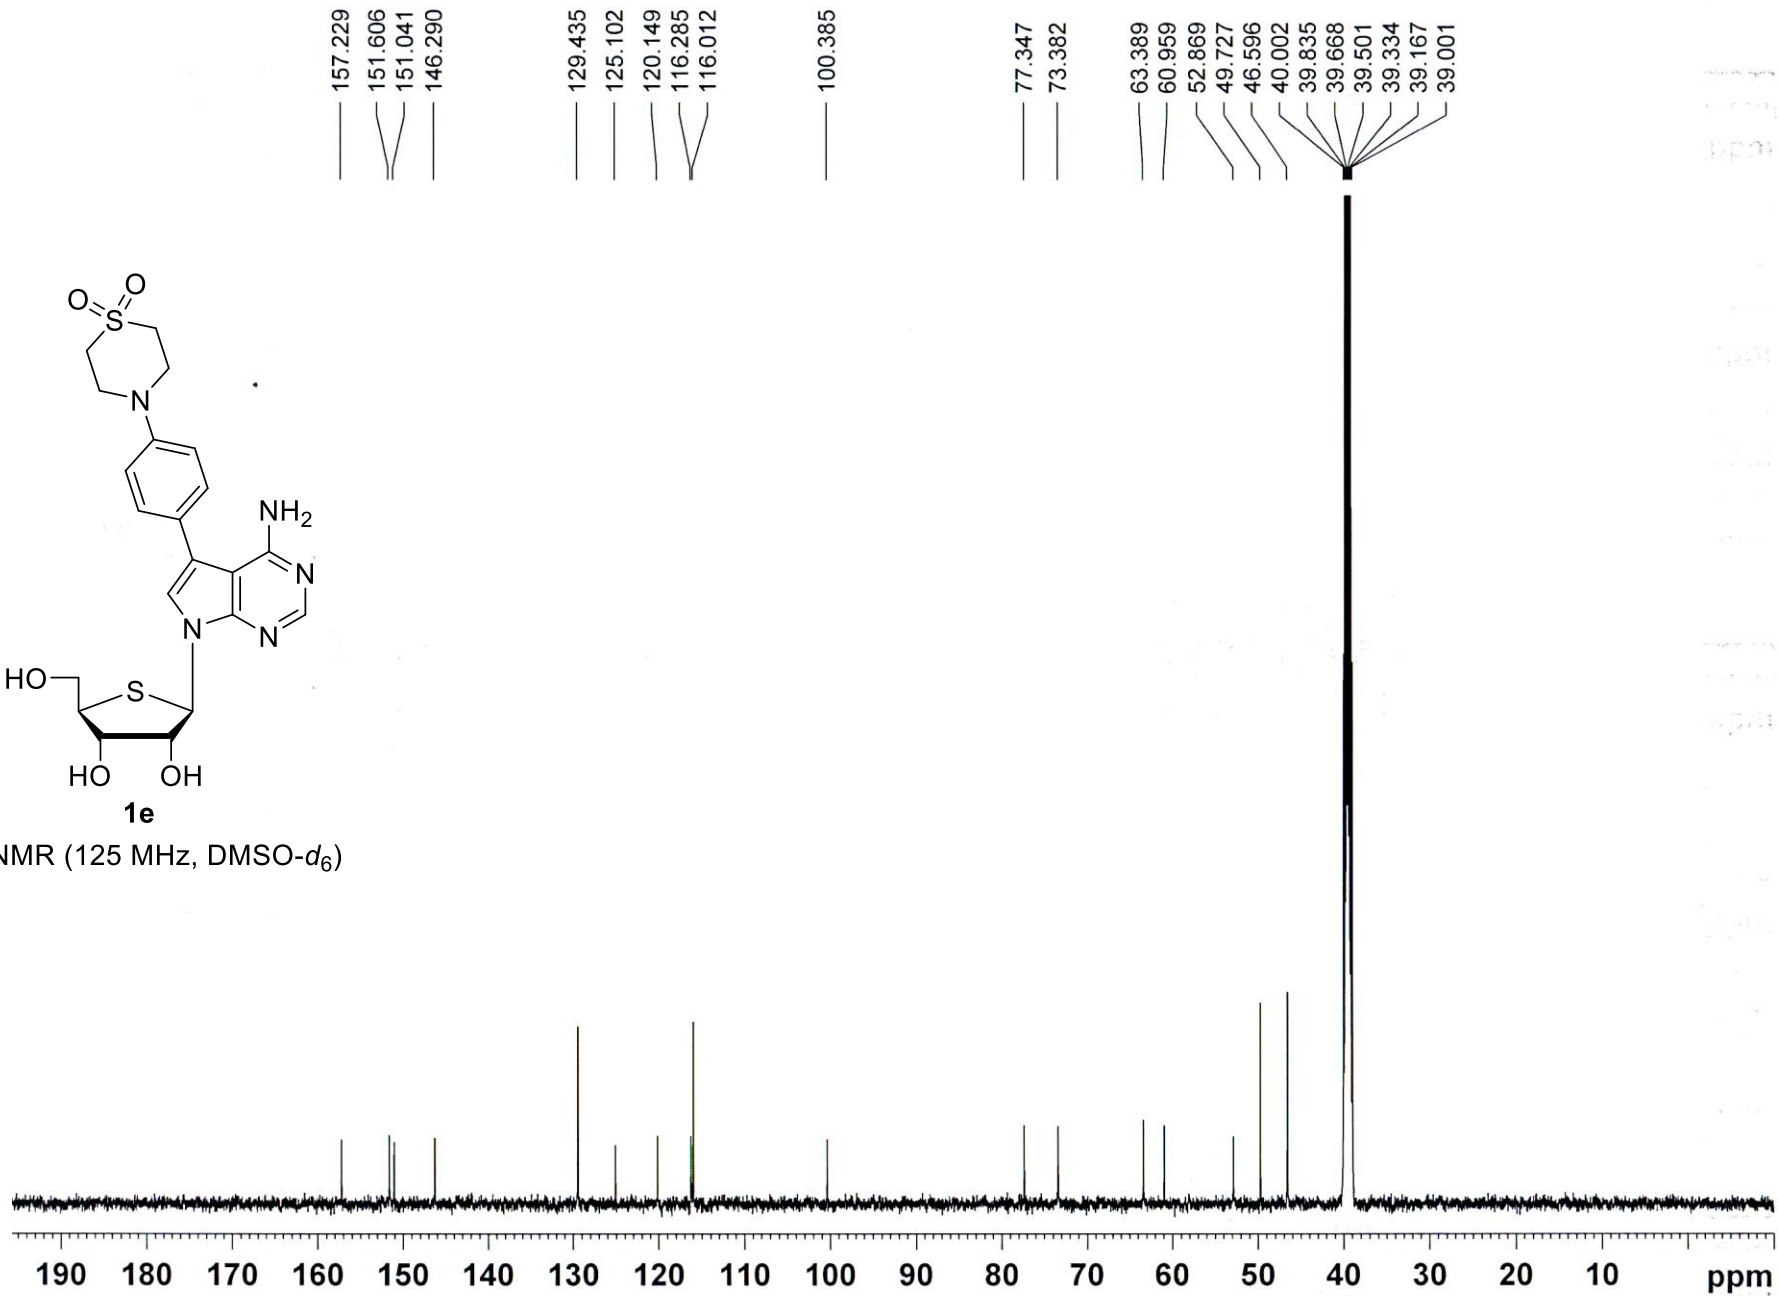

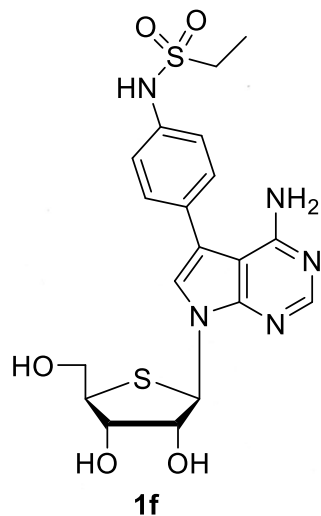

<sup>1</sup>H NMR (500 MHz, DMSO-*d*<sub>6</sub>)

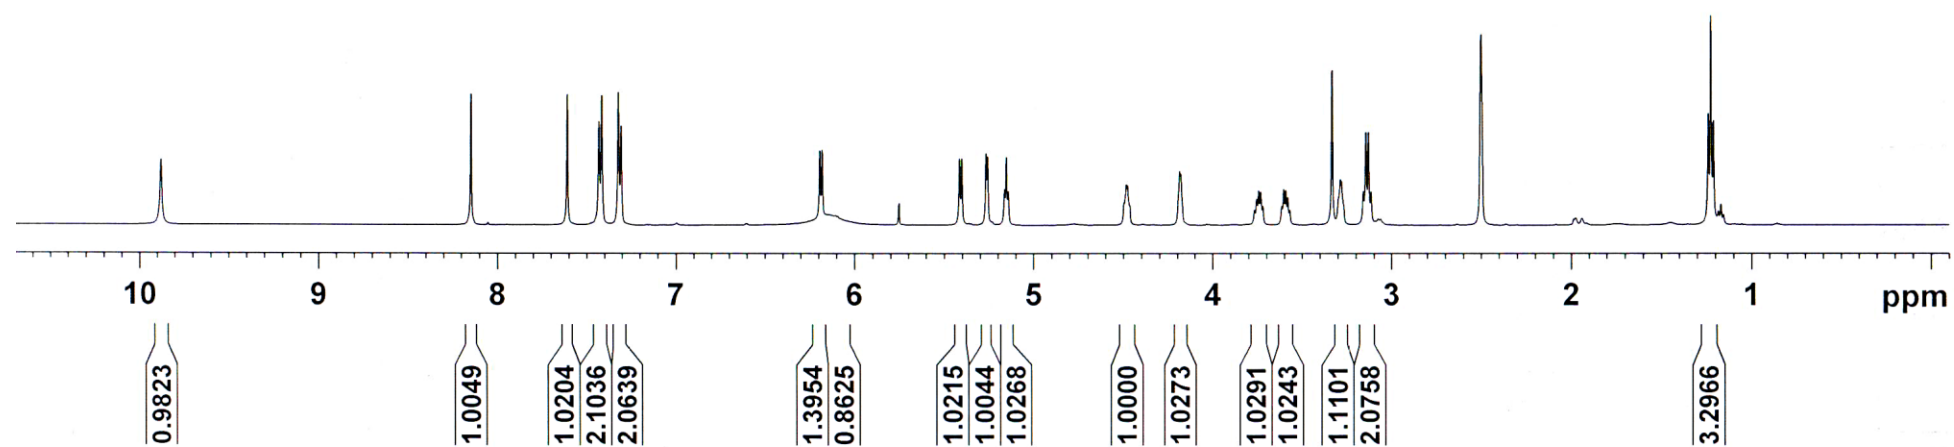



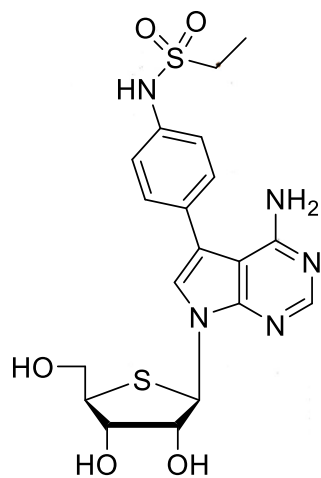

**1f**

$^{13}\text{C}$  NMR (125 MHz,  $\text{DMSO}-d_6$ )

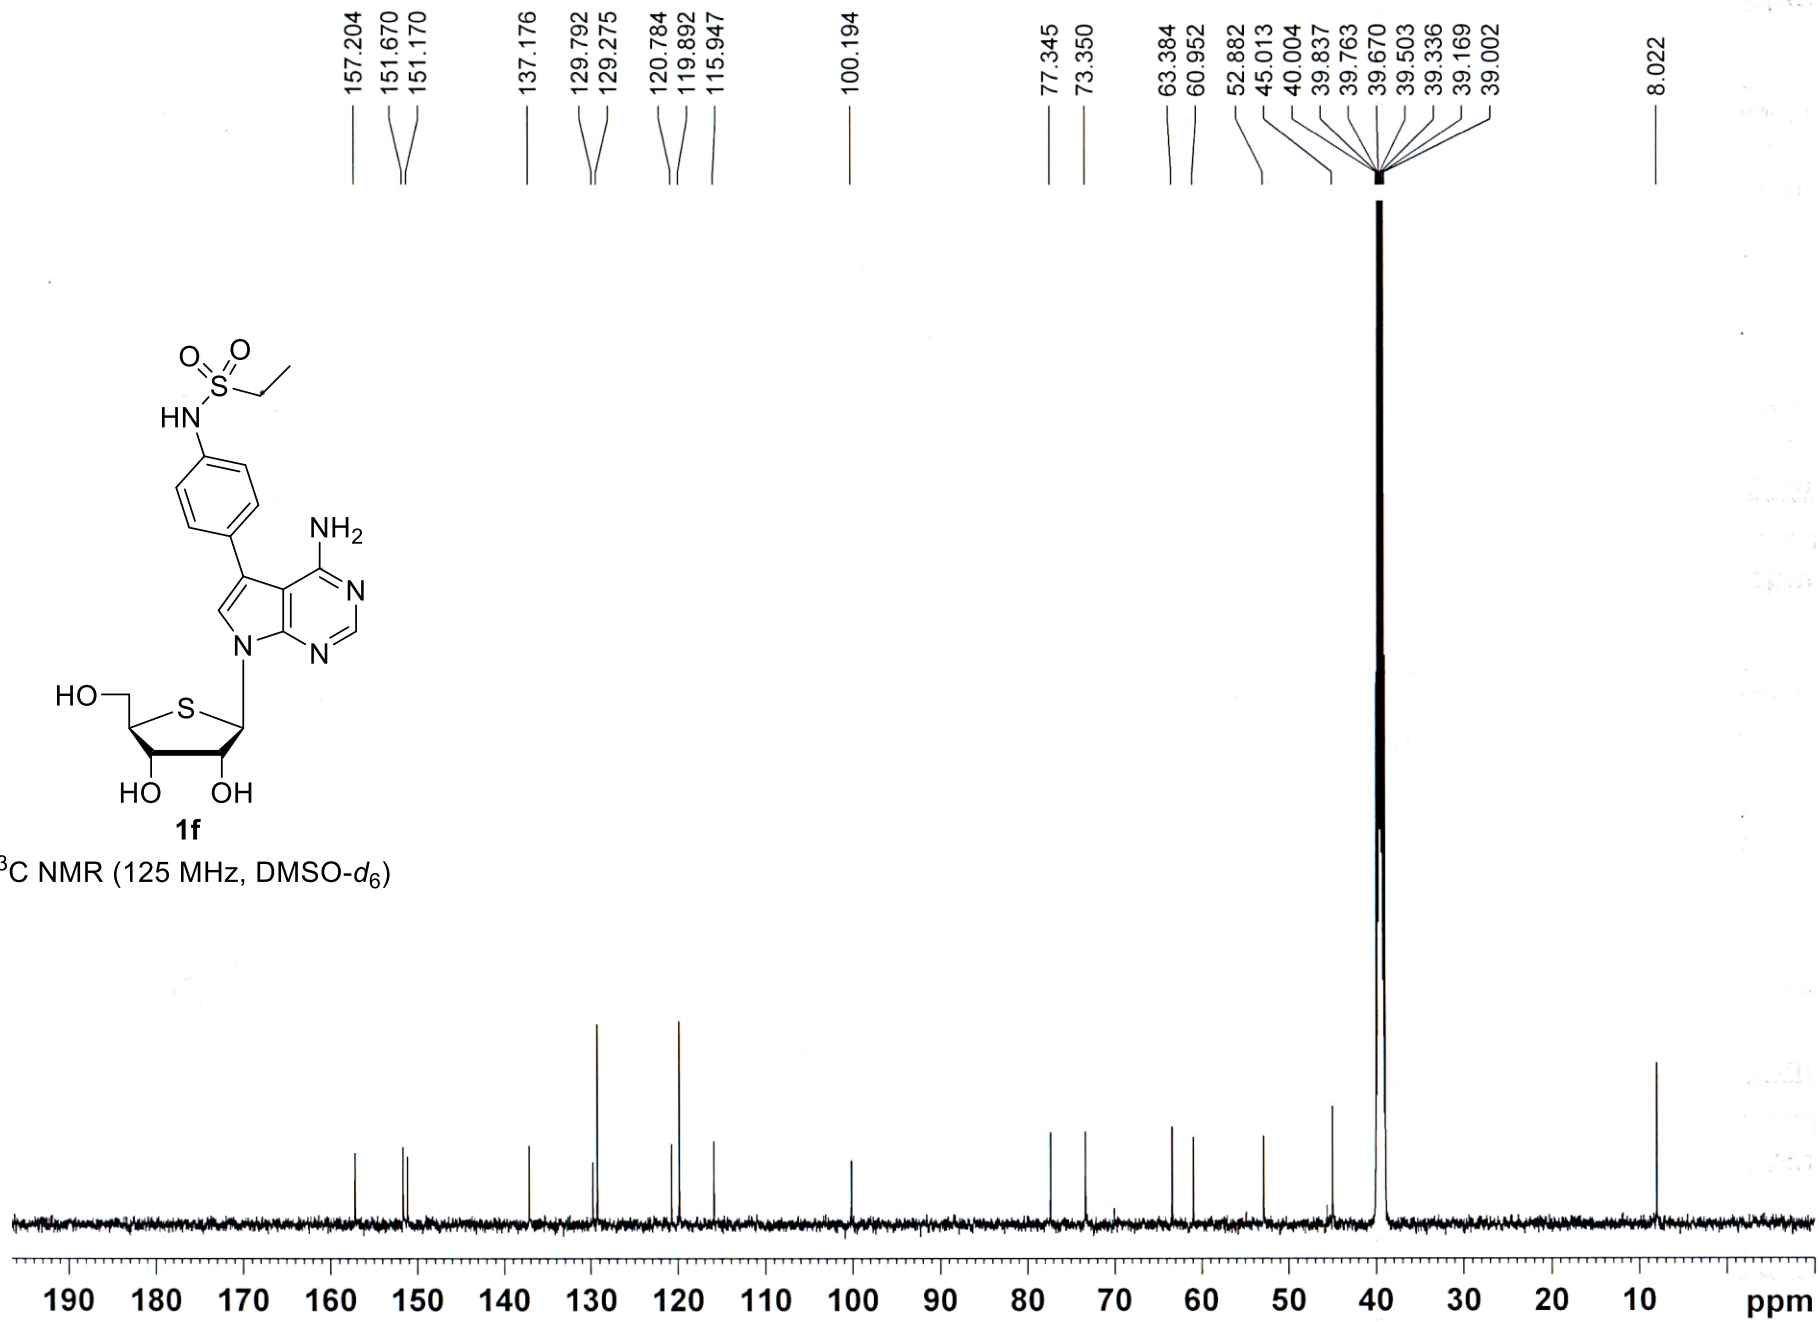

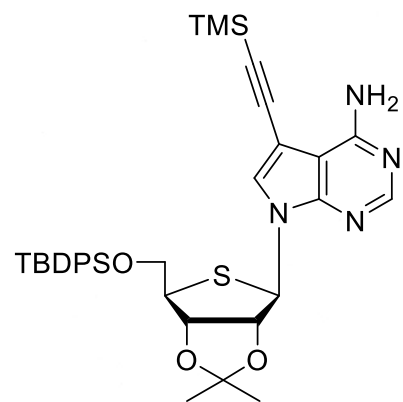

**13**

$^1\text{H}$  NMR (500 MHz,  $\text{CDCl}_3$ )

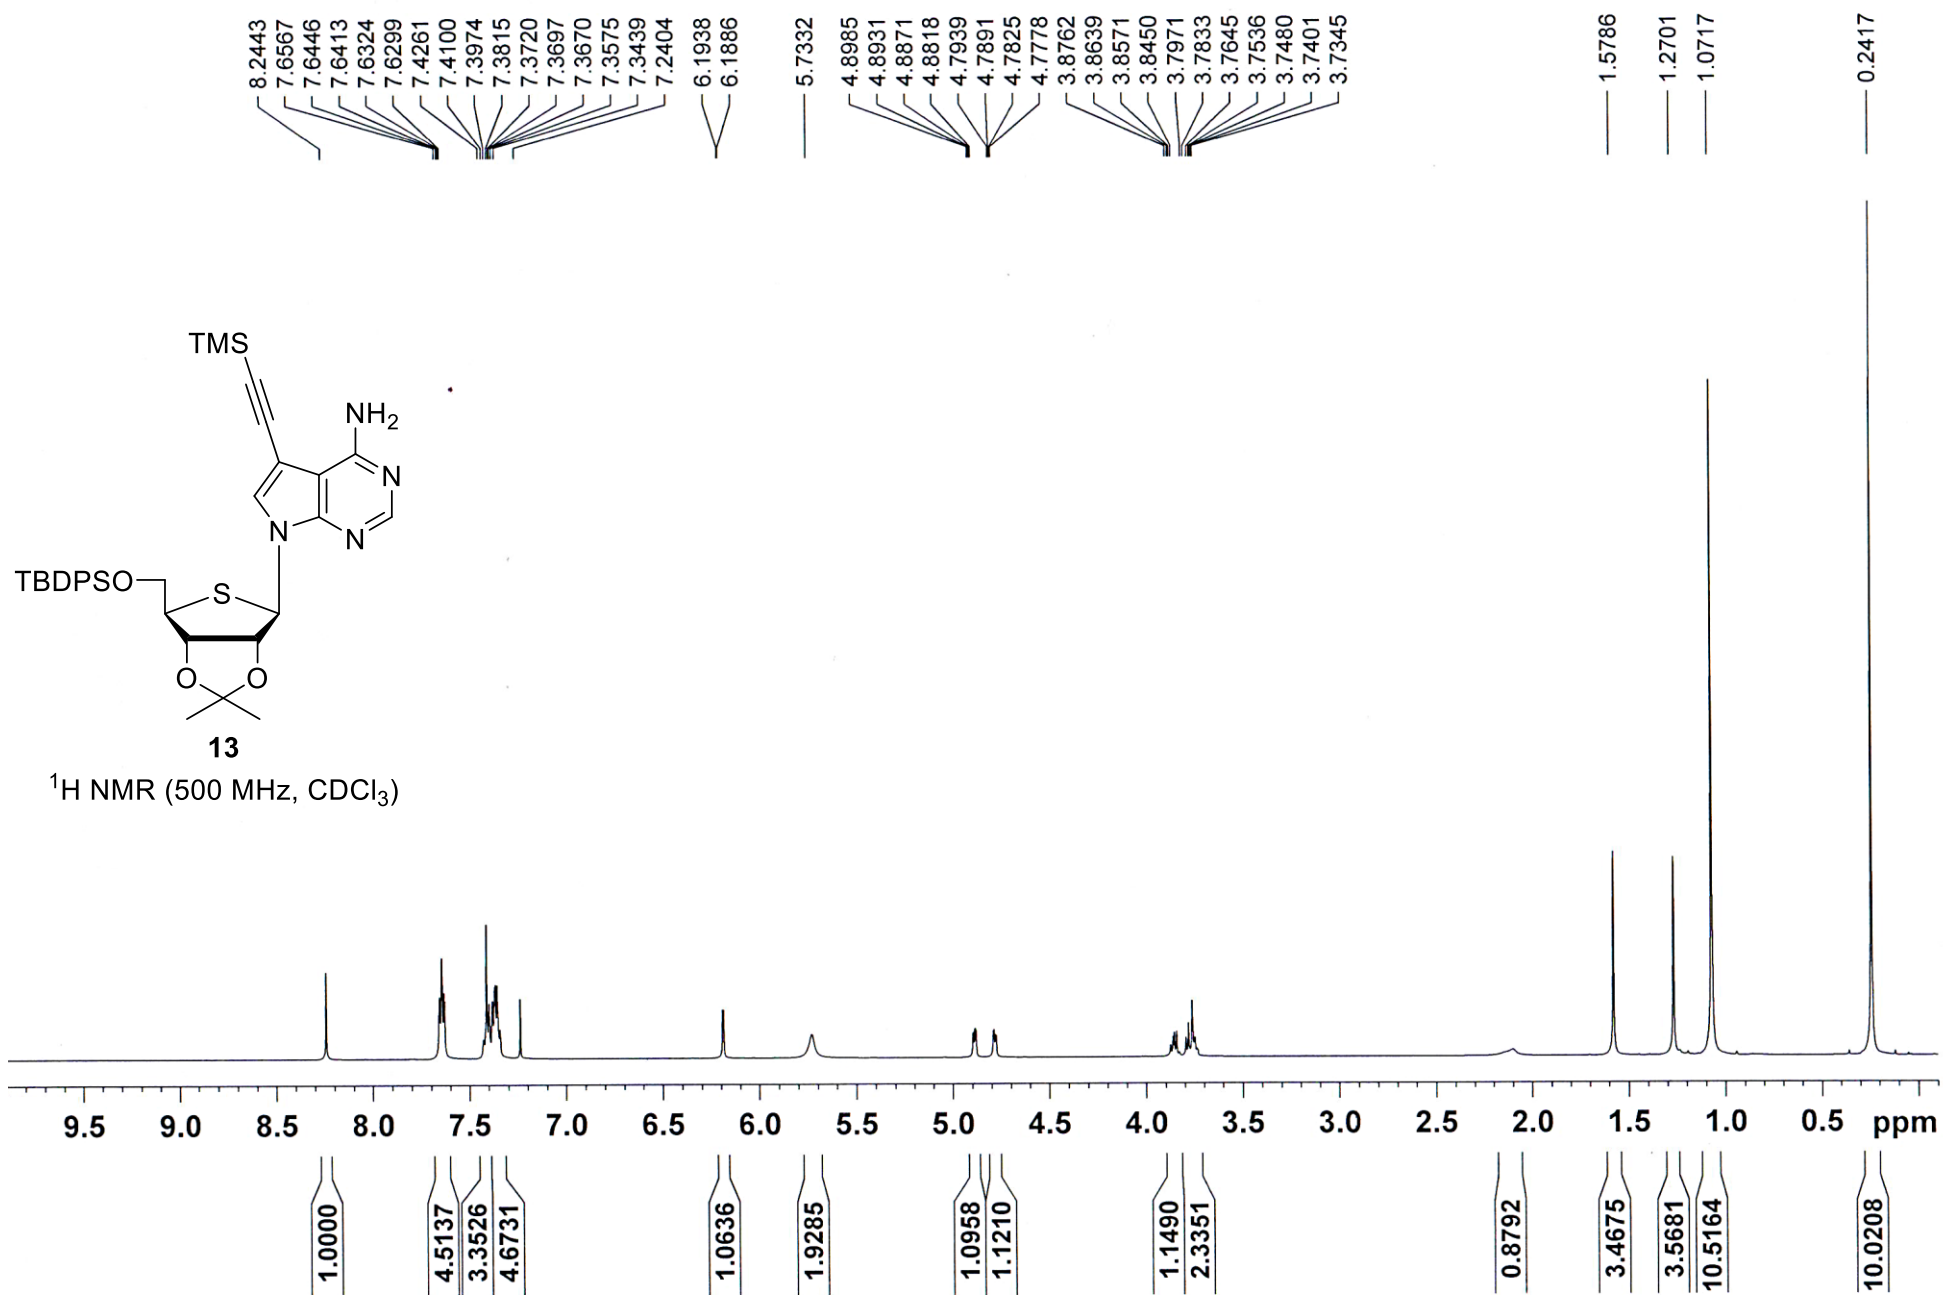

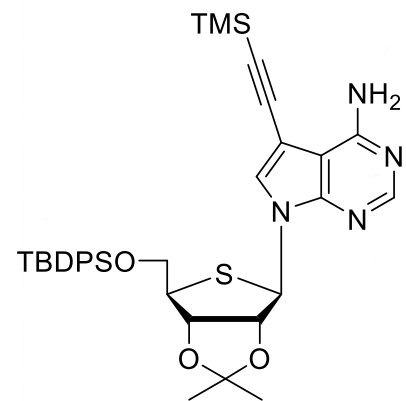**13** $^{13}\text{C}$  NMR (100 MHz,  $\text{CDCl}_3$ )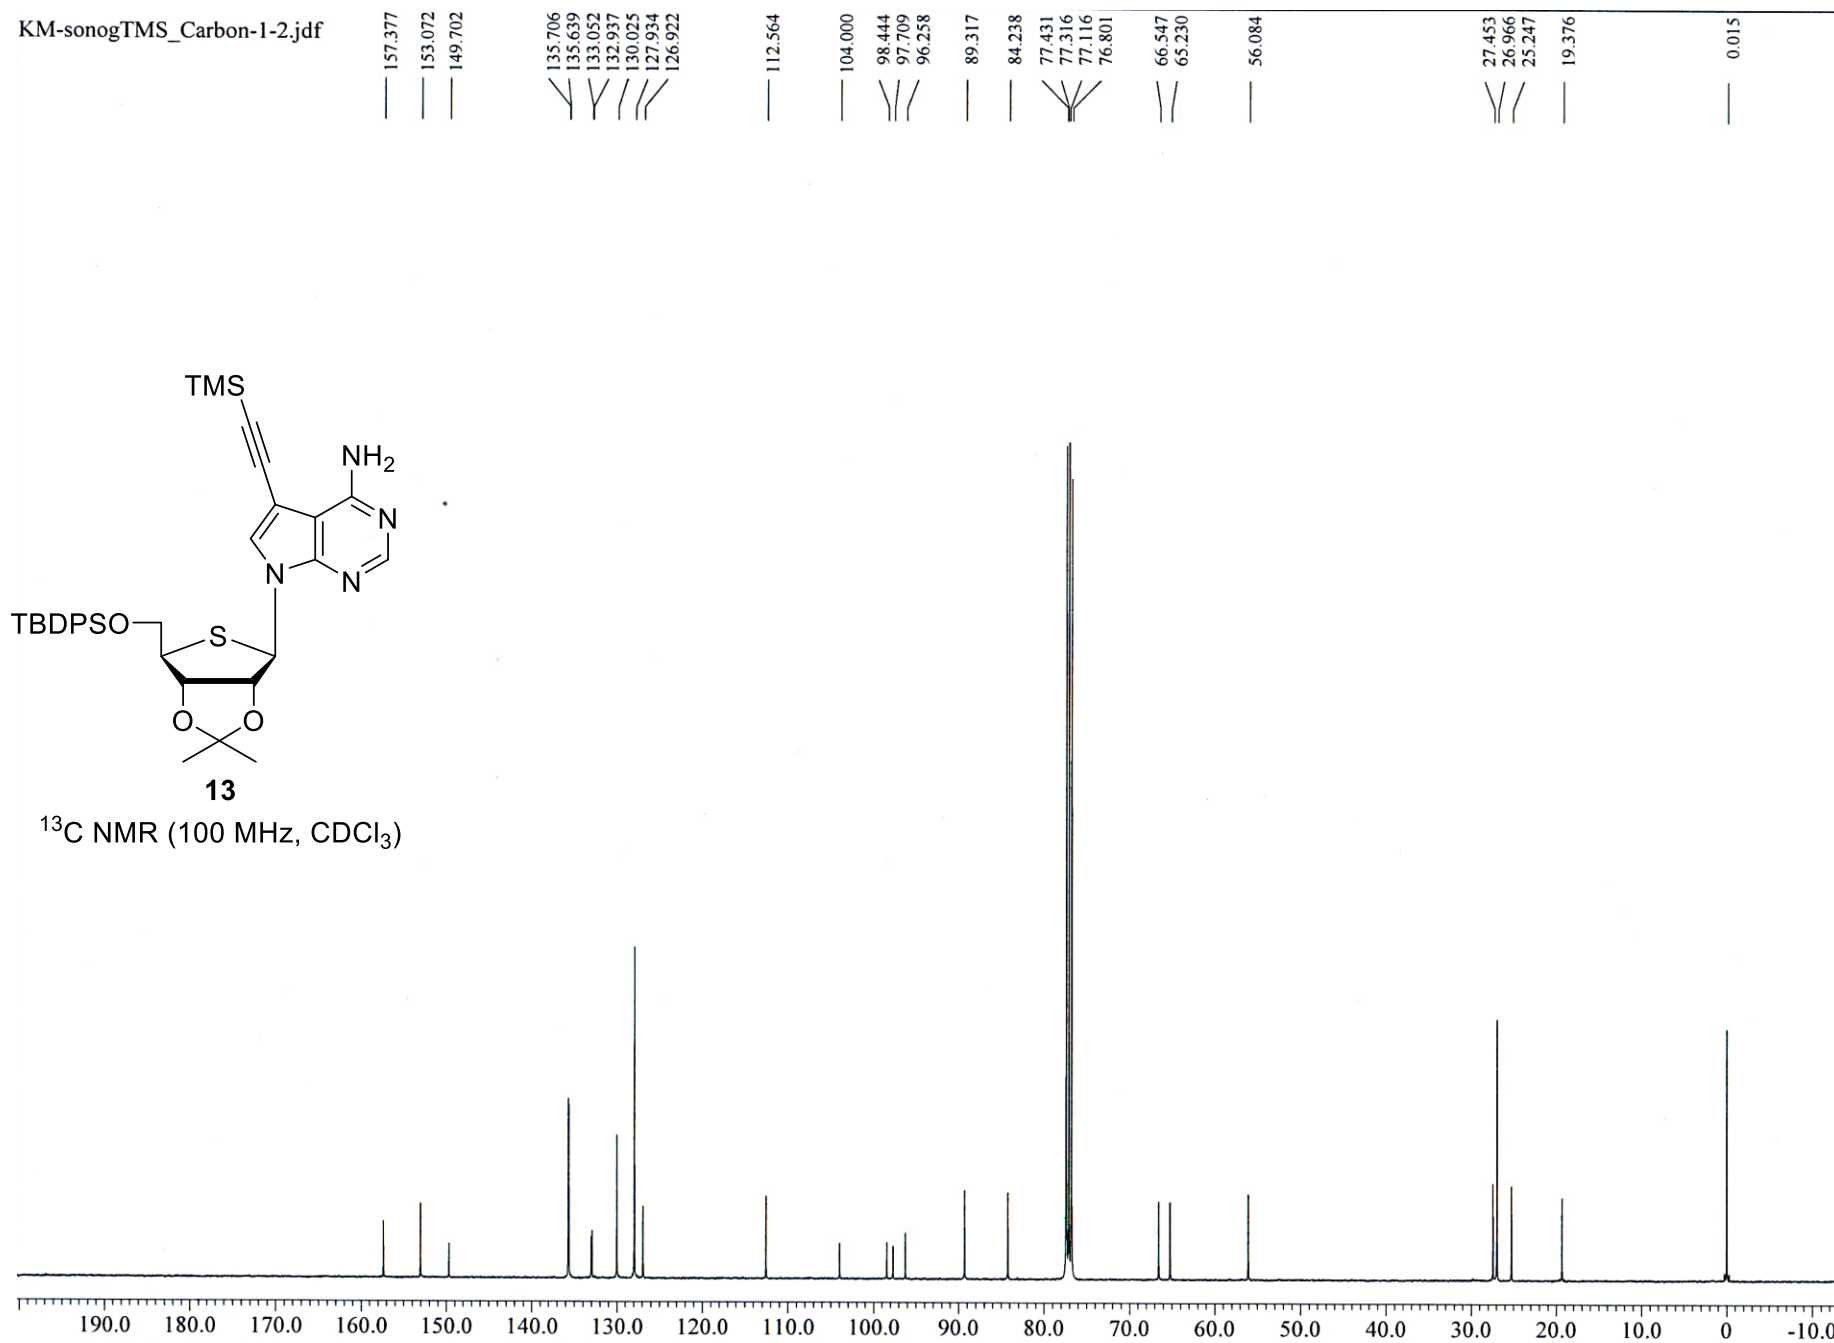

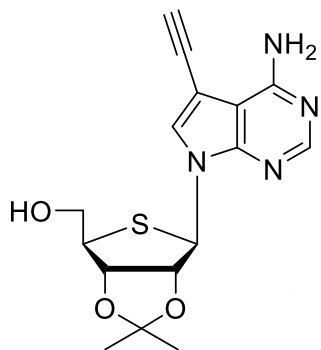

**14**

<sup>1</sup>H NMR (500 MHz, CD<sub>3</sub>OD)

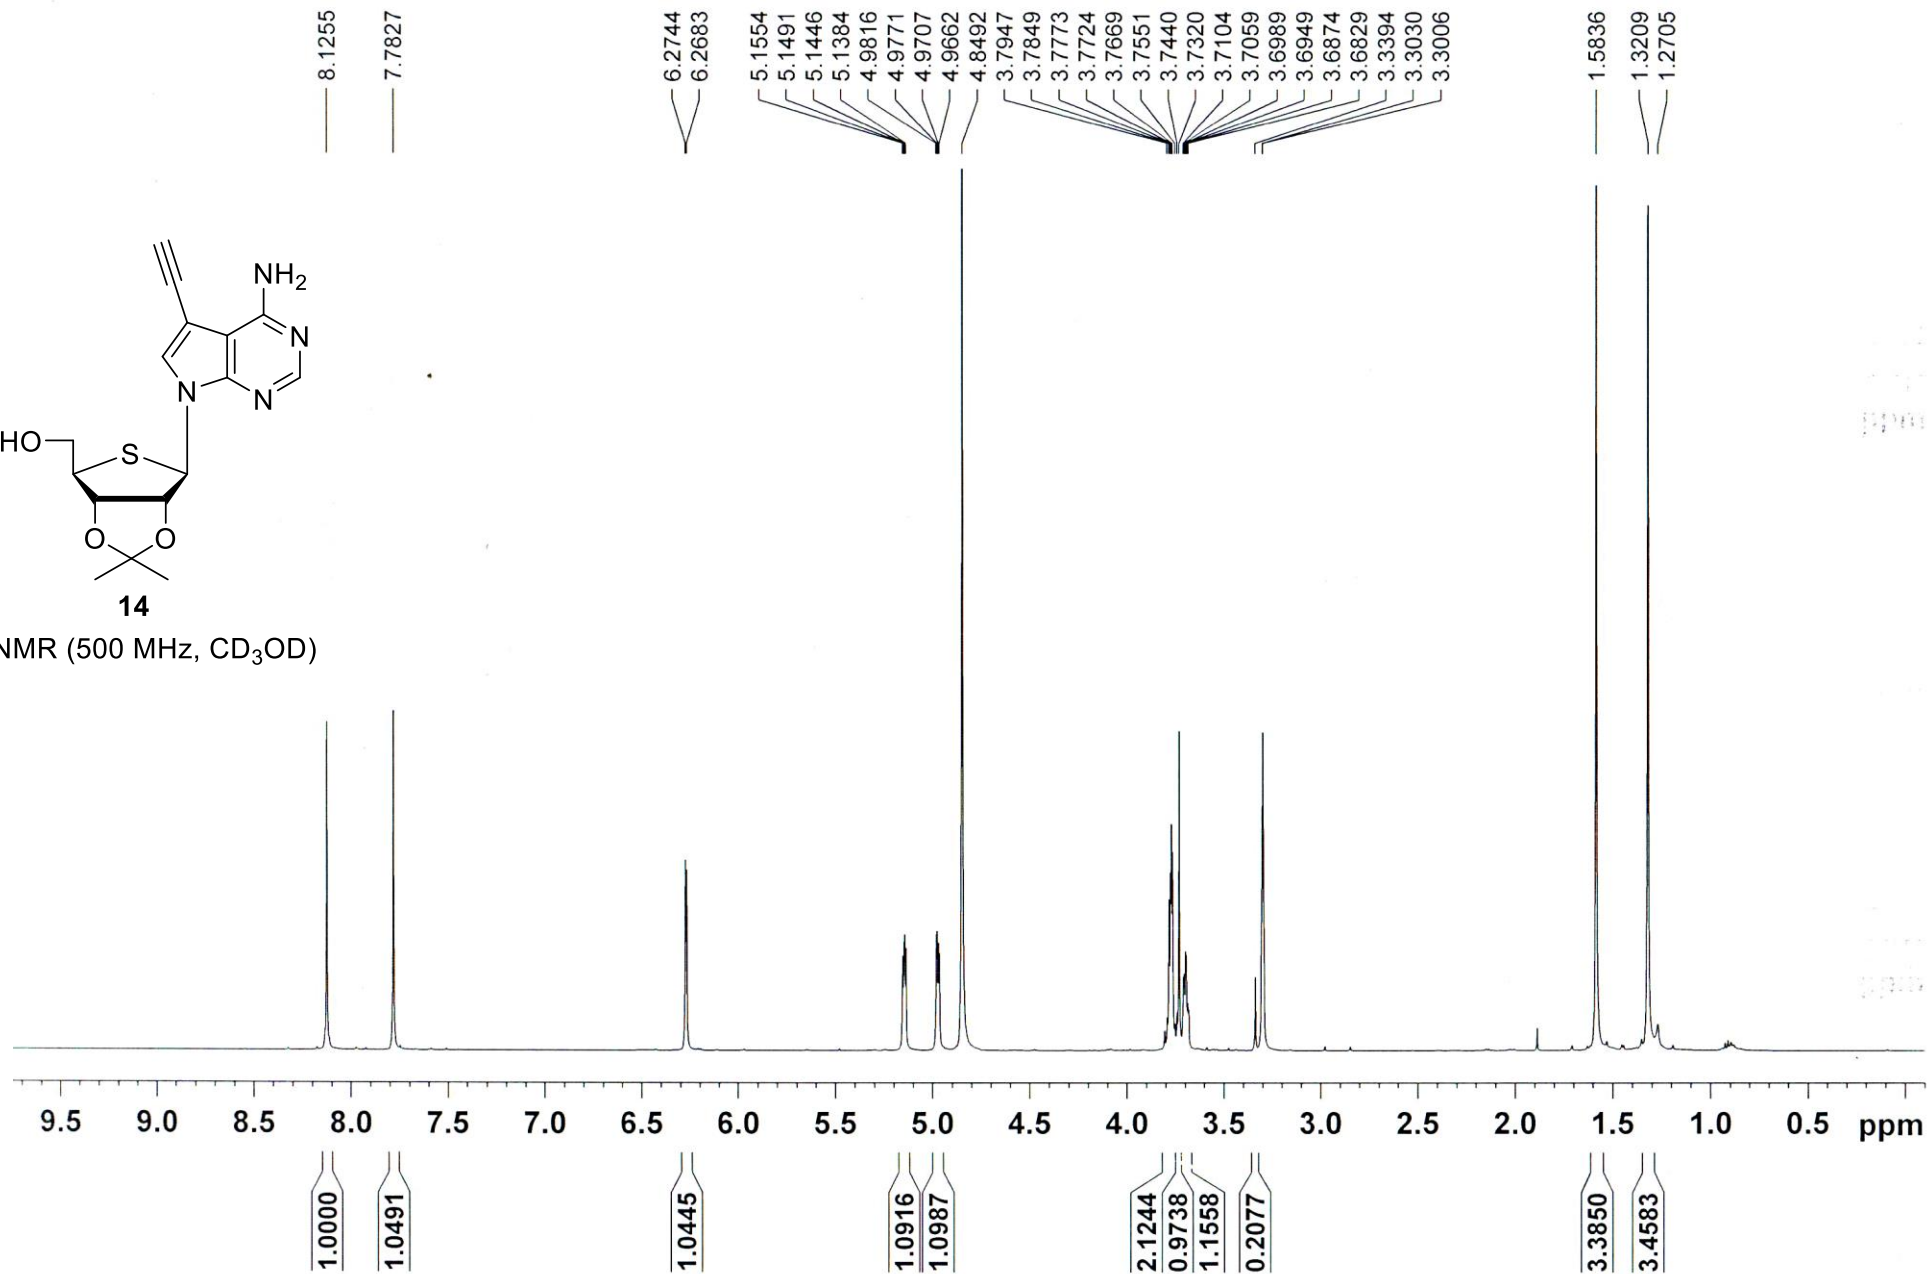

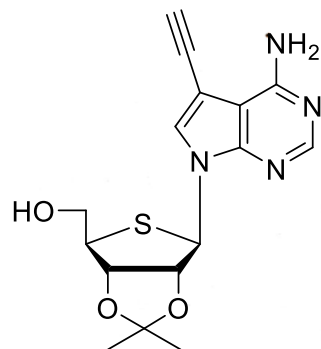

**14**

<sup>13</sup>C NMR (125 MHz, CD<sub>3</sub>OD)

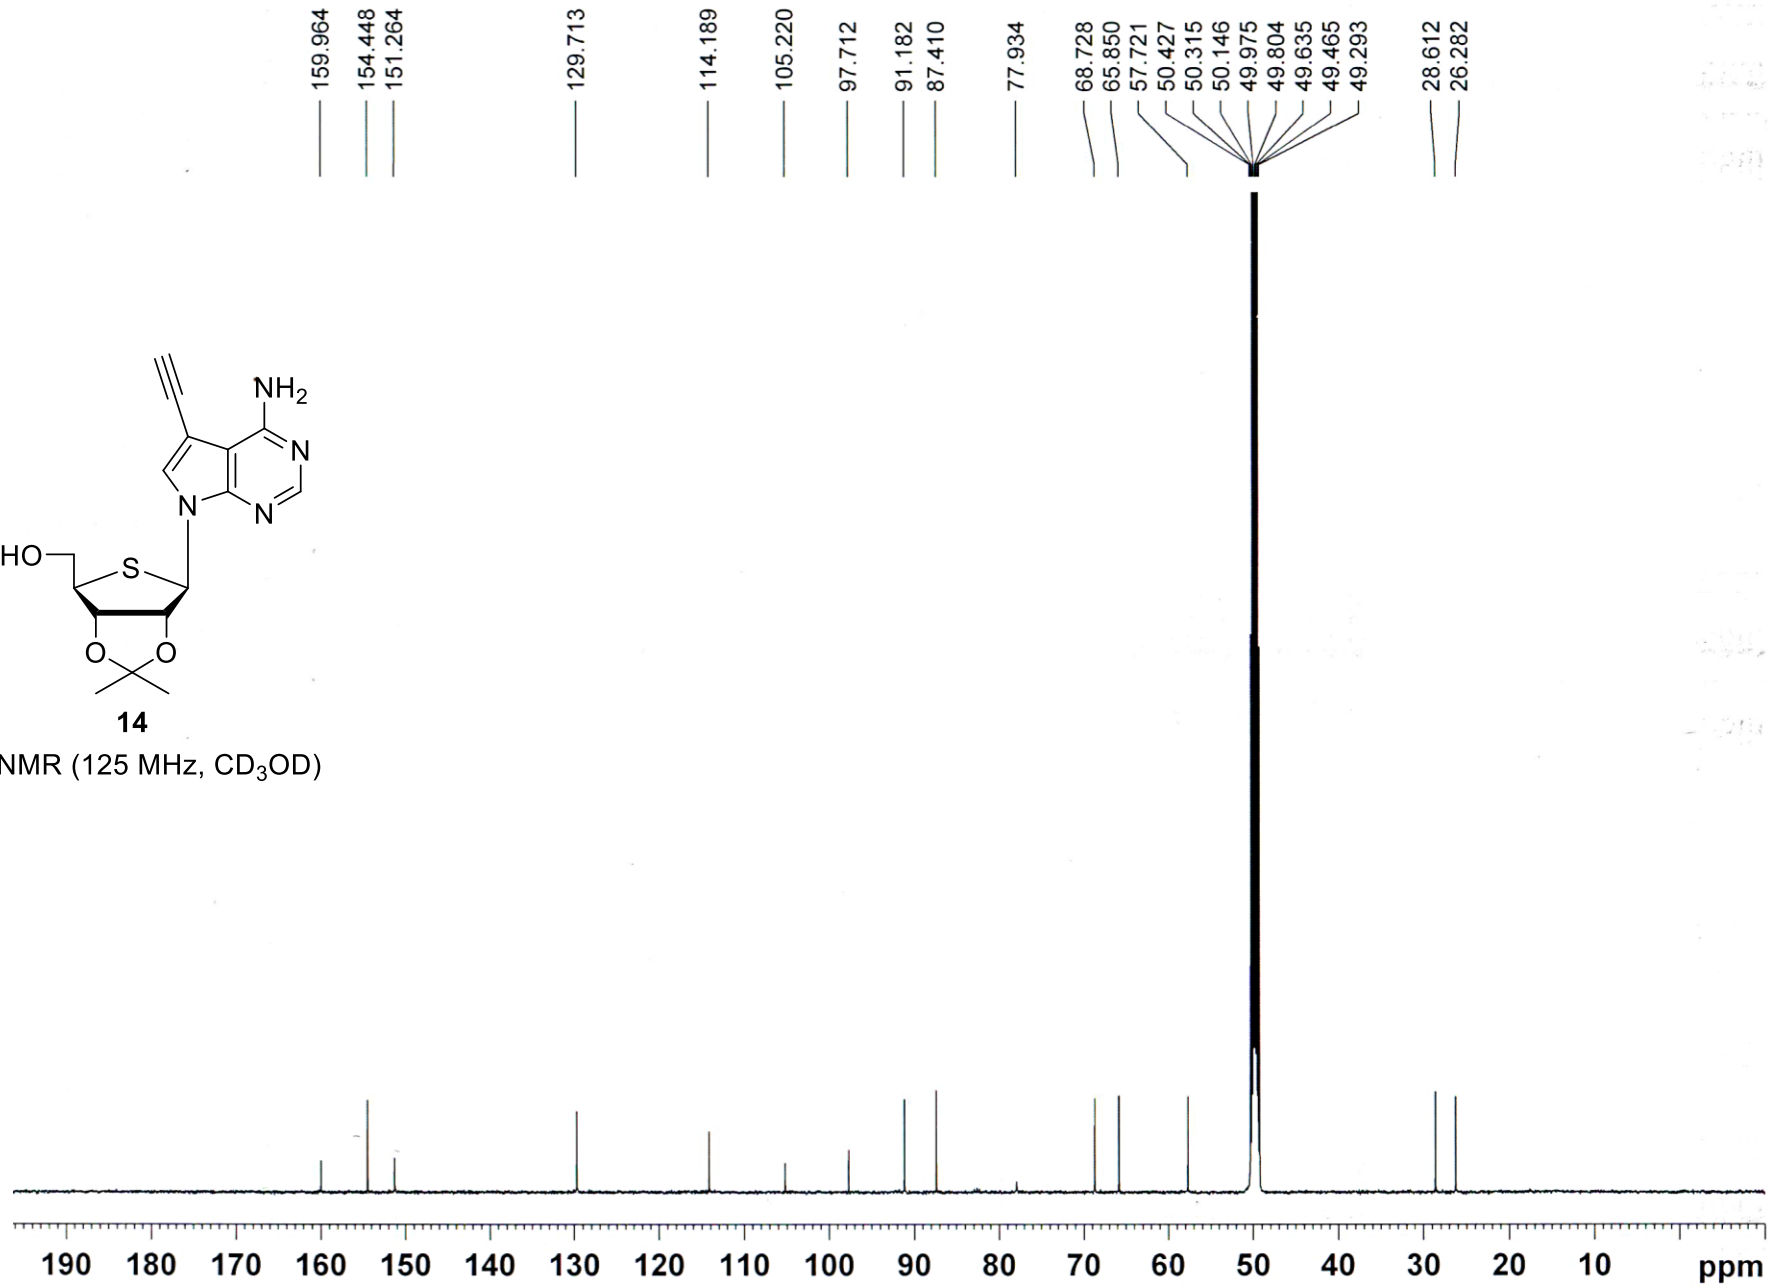

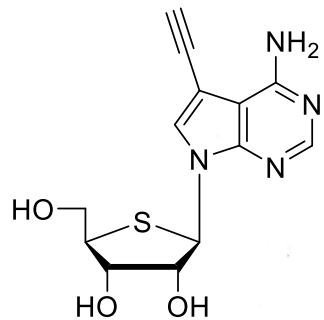

**1g**

$^1\text{H}$  NMR (500 MHz,  $\text{DMSO}-d_6$ )

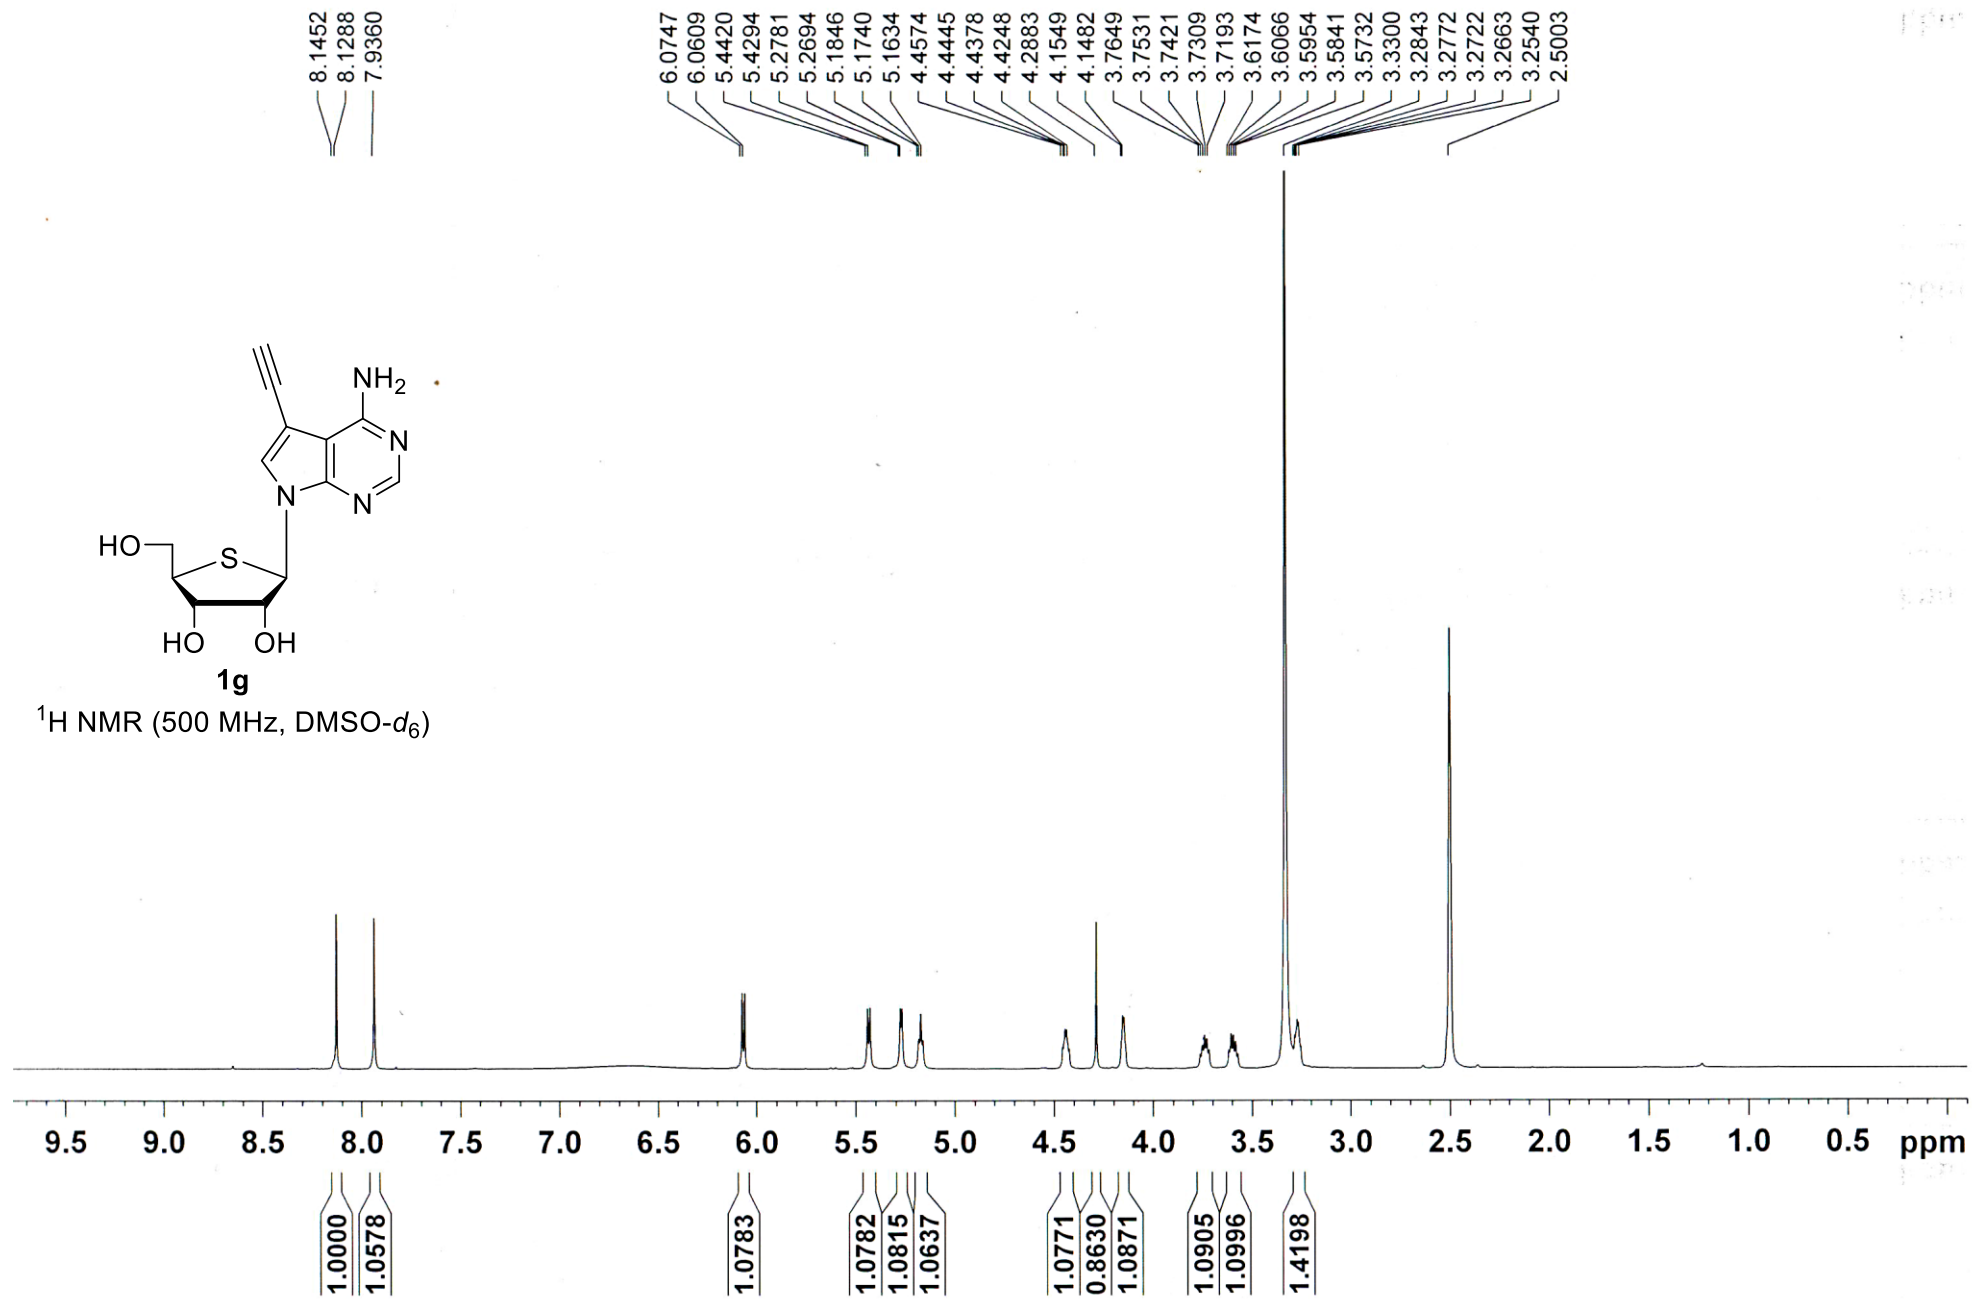

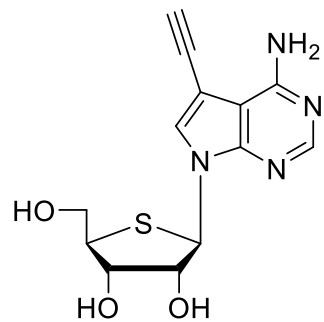

**1g**

$^{13}\text{C}$  NMR (150 MHz,  $\text{DMSO}-d_6$ )

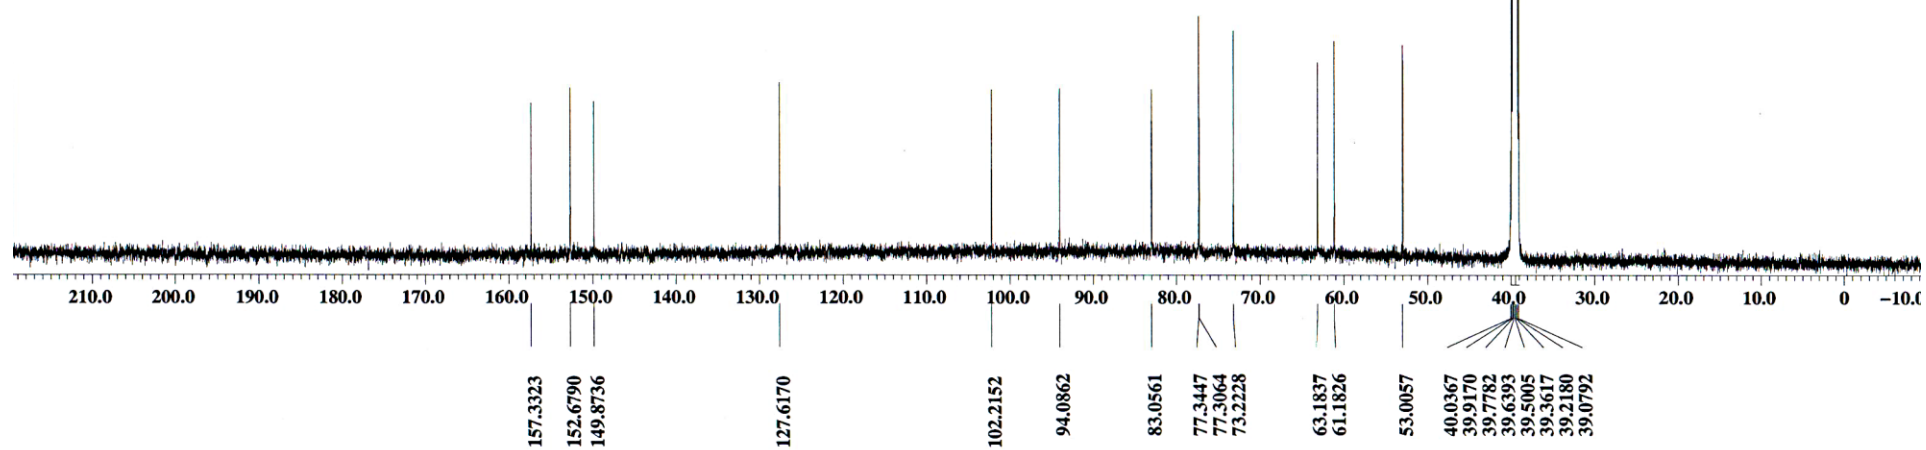

km-spr\_Proton-1-2.jdf

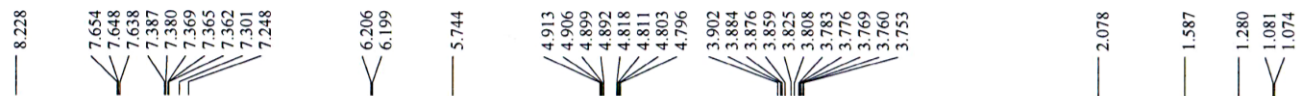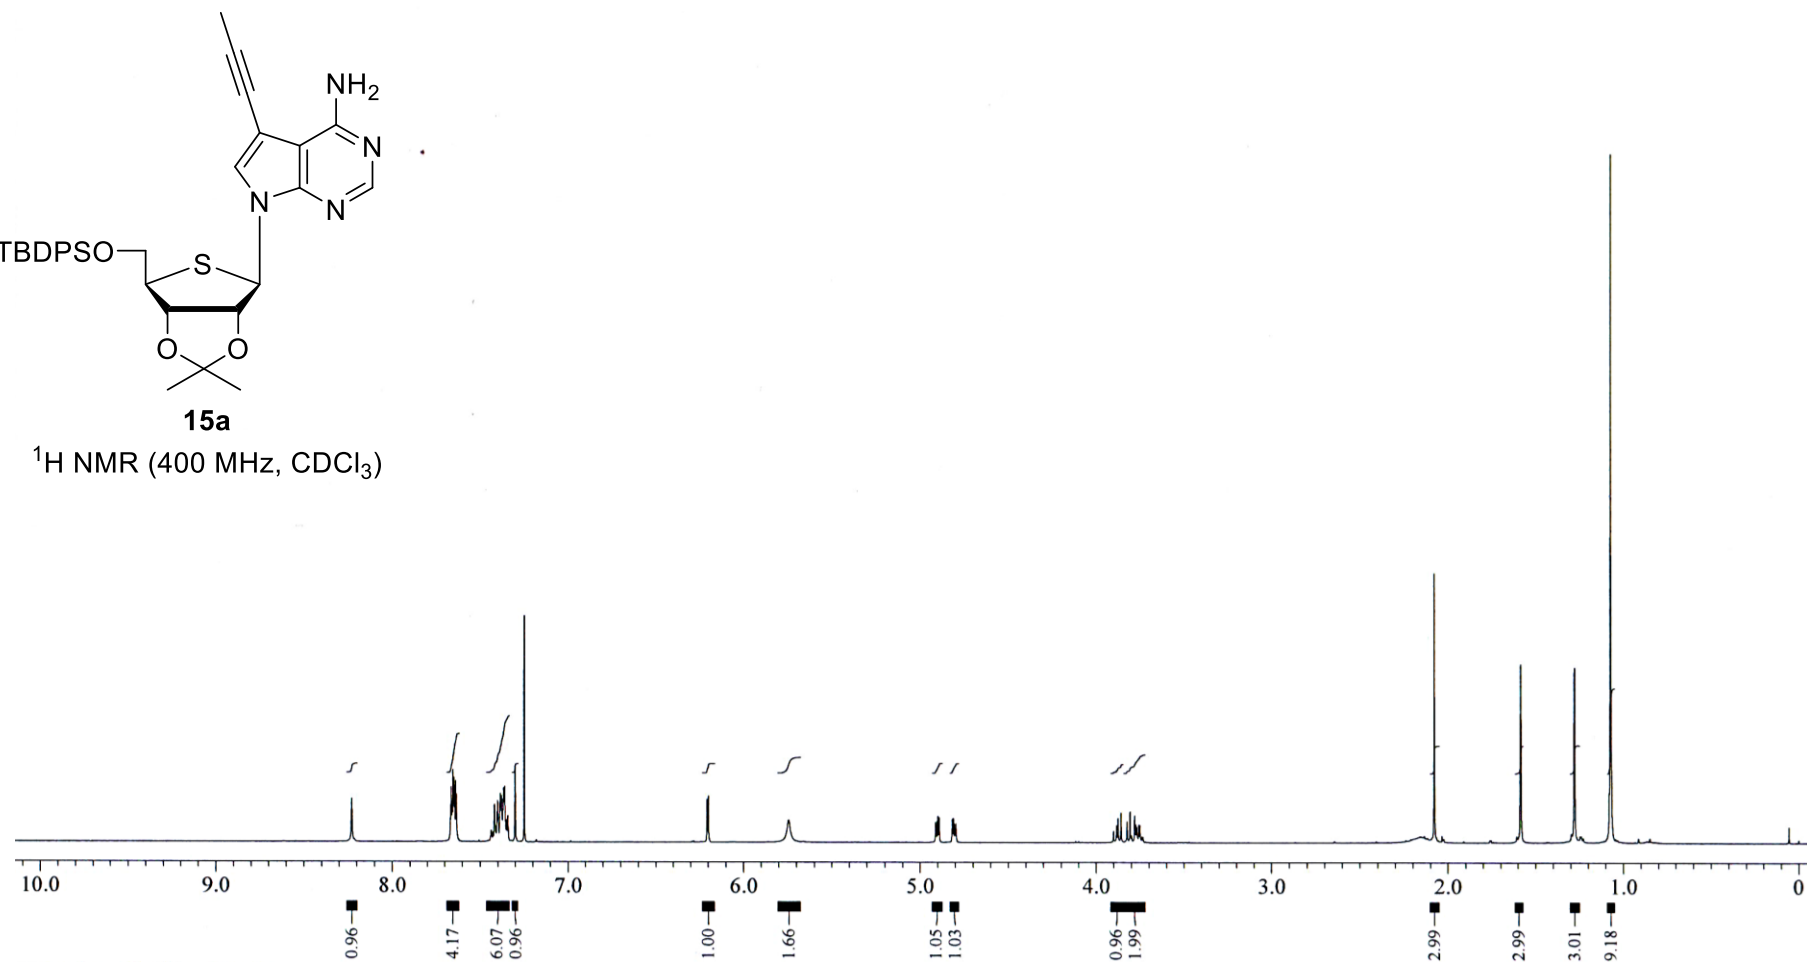



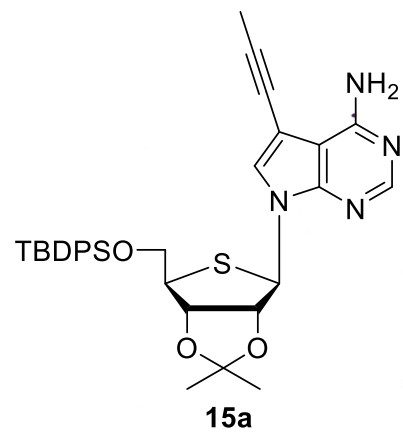

$^{13}\text{C}$  NMR (100 MHz,  $\text{CDCl}_3$ )

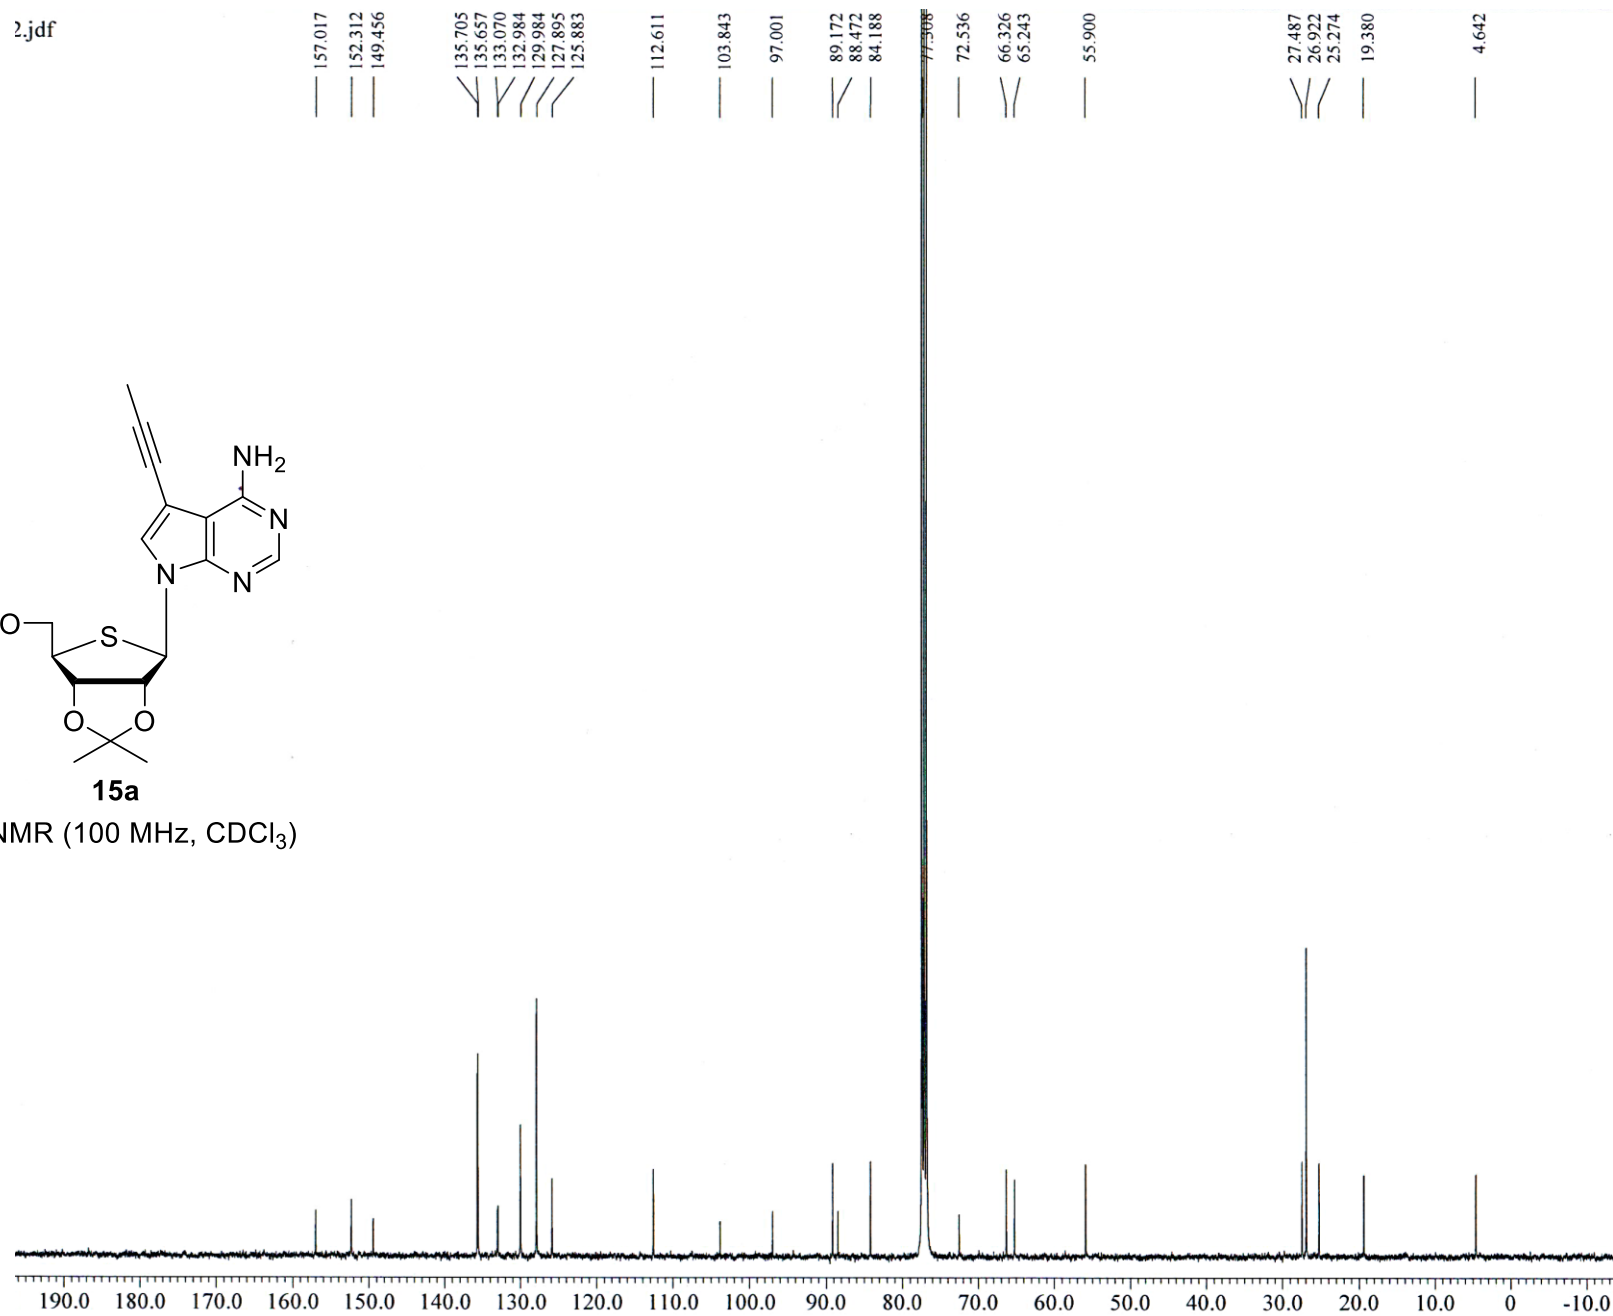

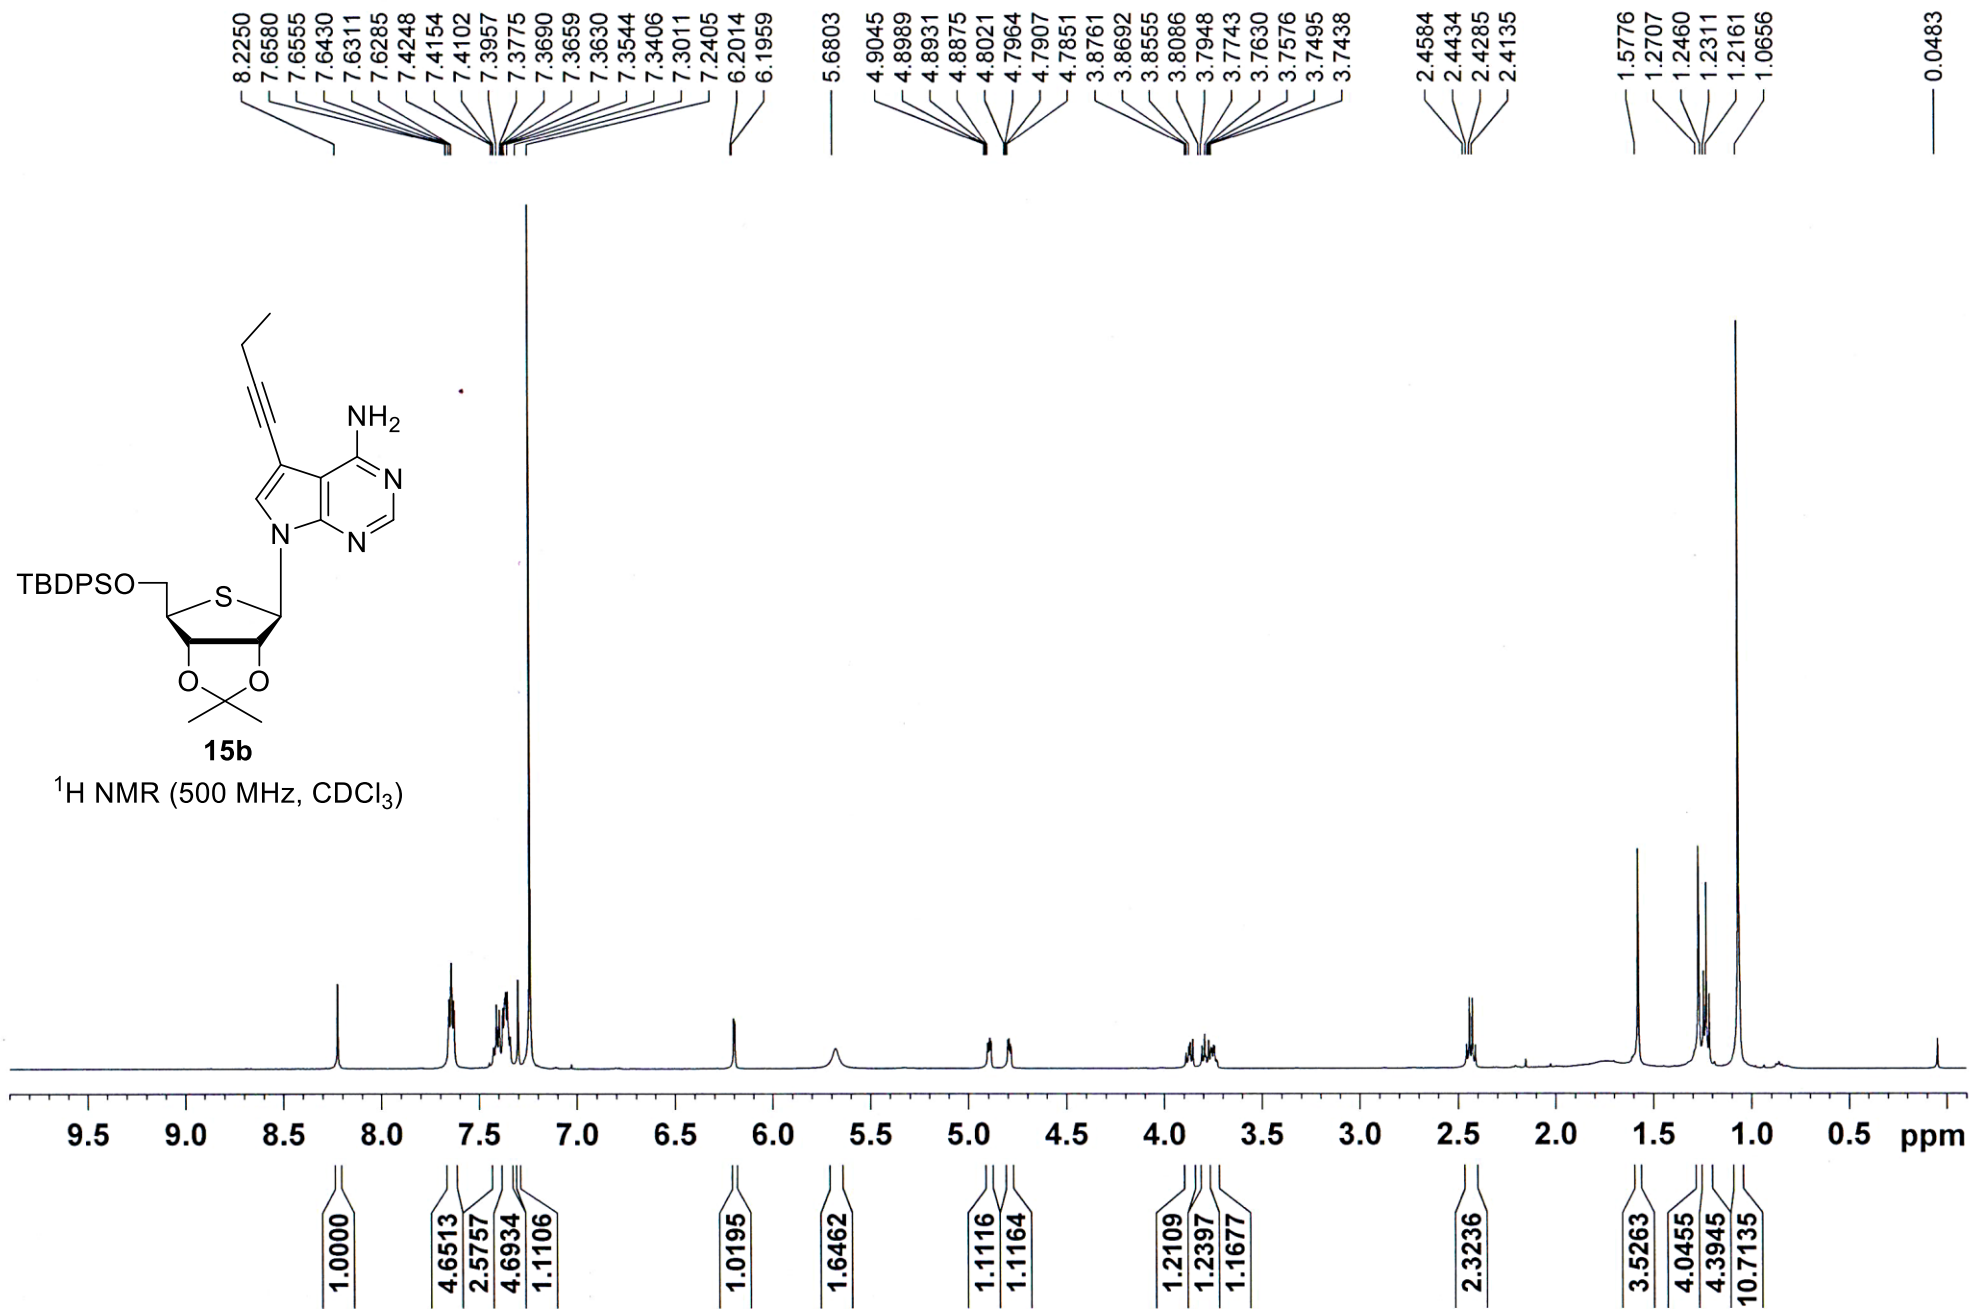

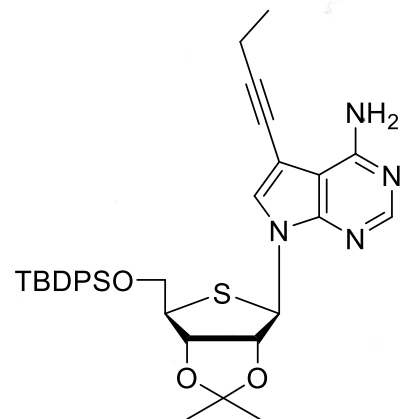**15b** $^{13}\text{C}$  NMR (100 MHz,  $\text{CDCl}_3$ )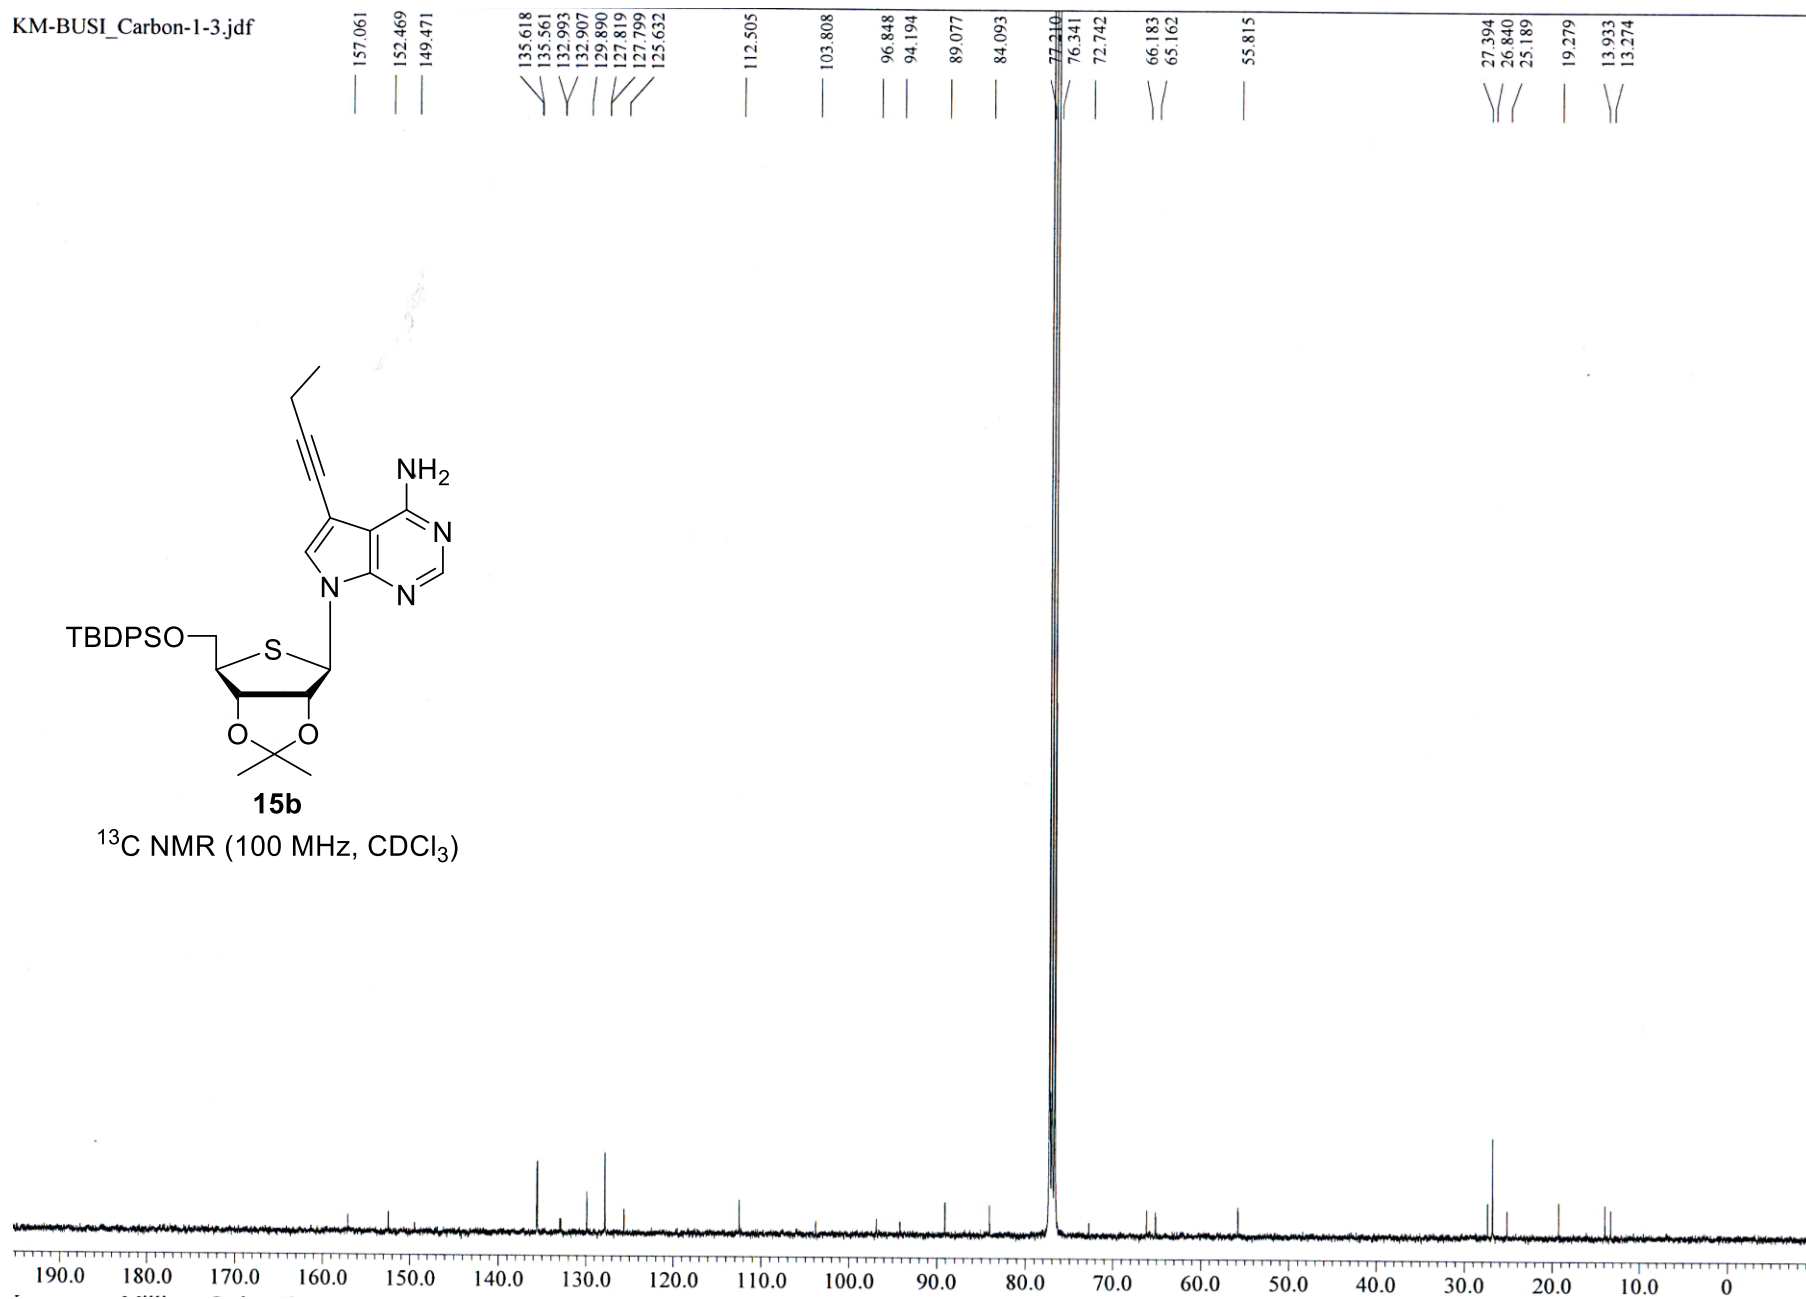

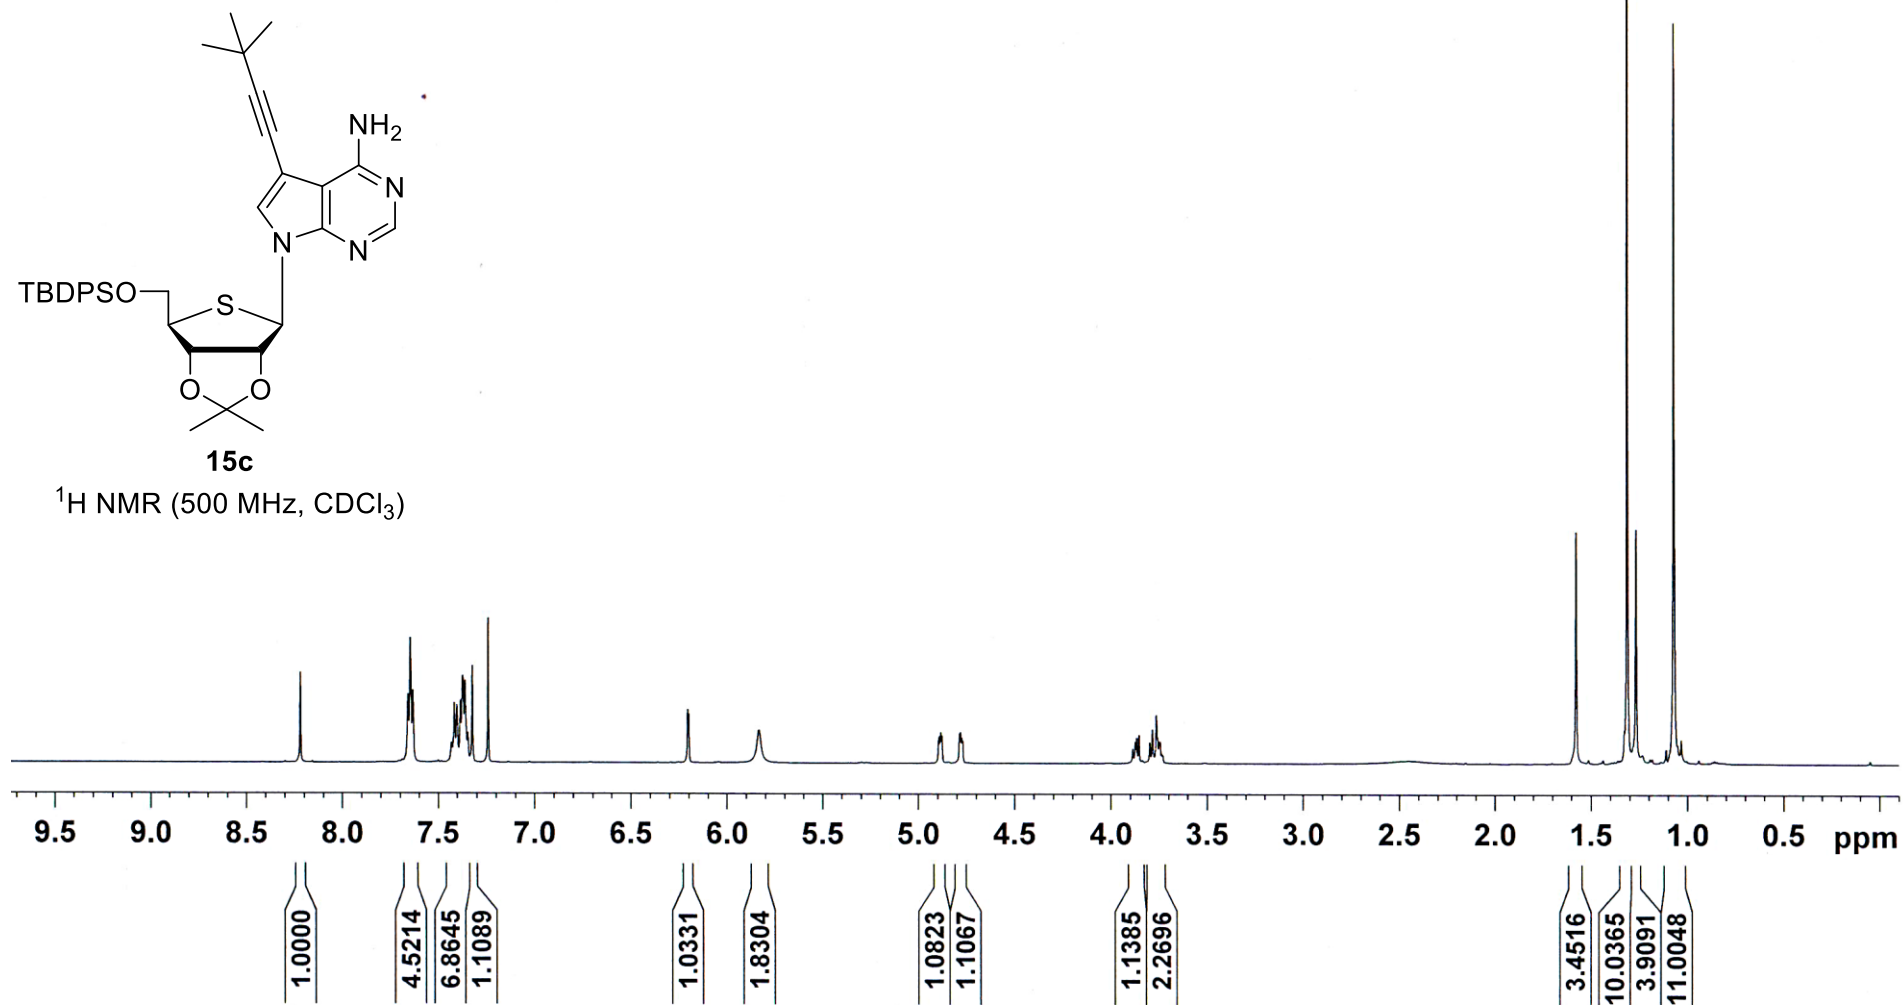

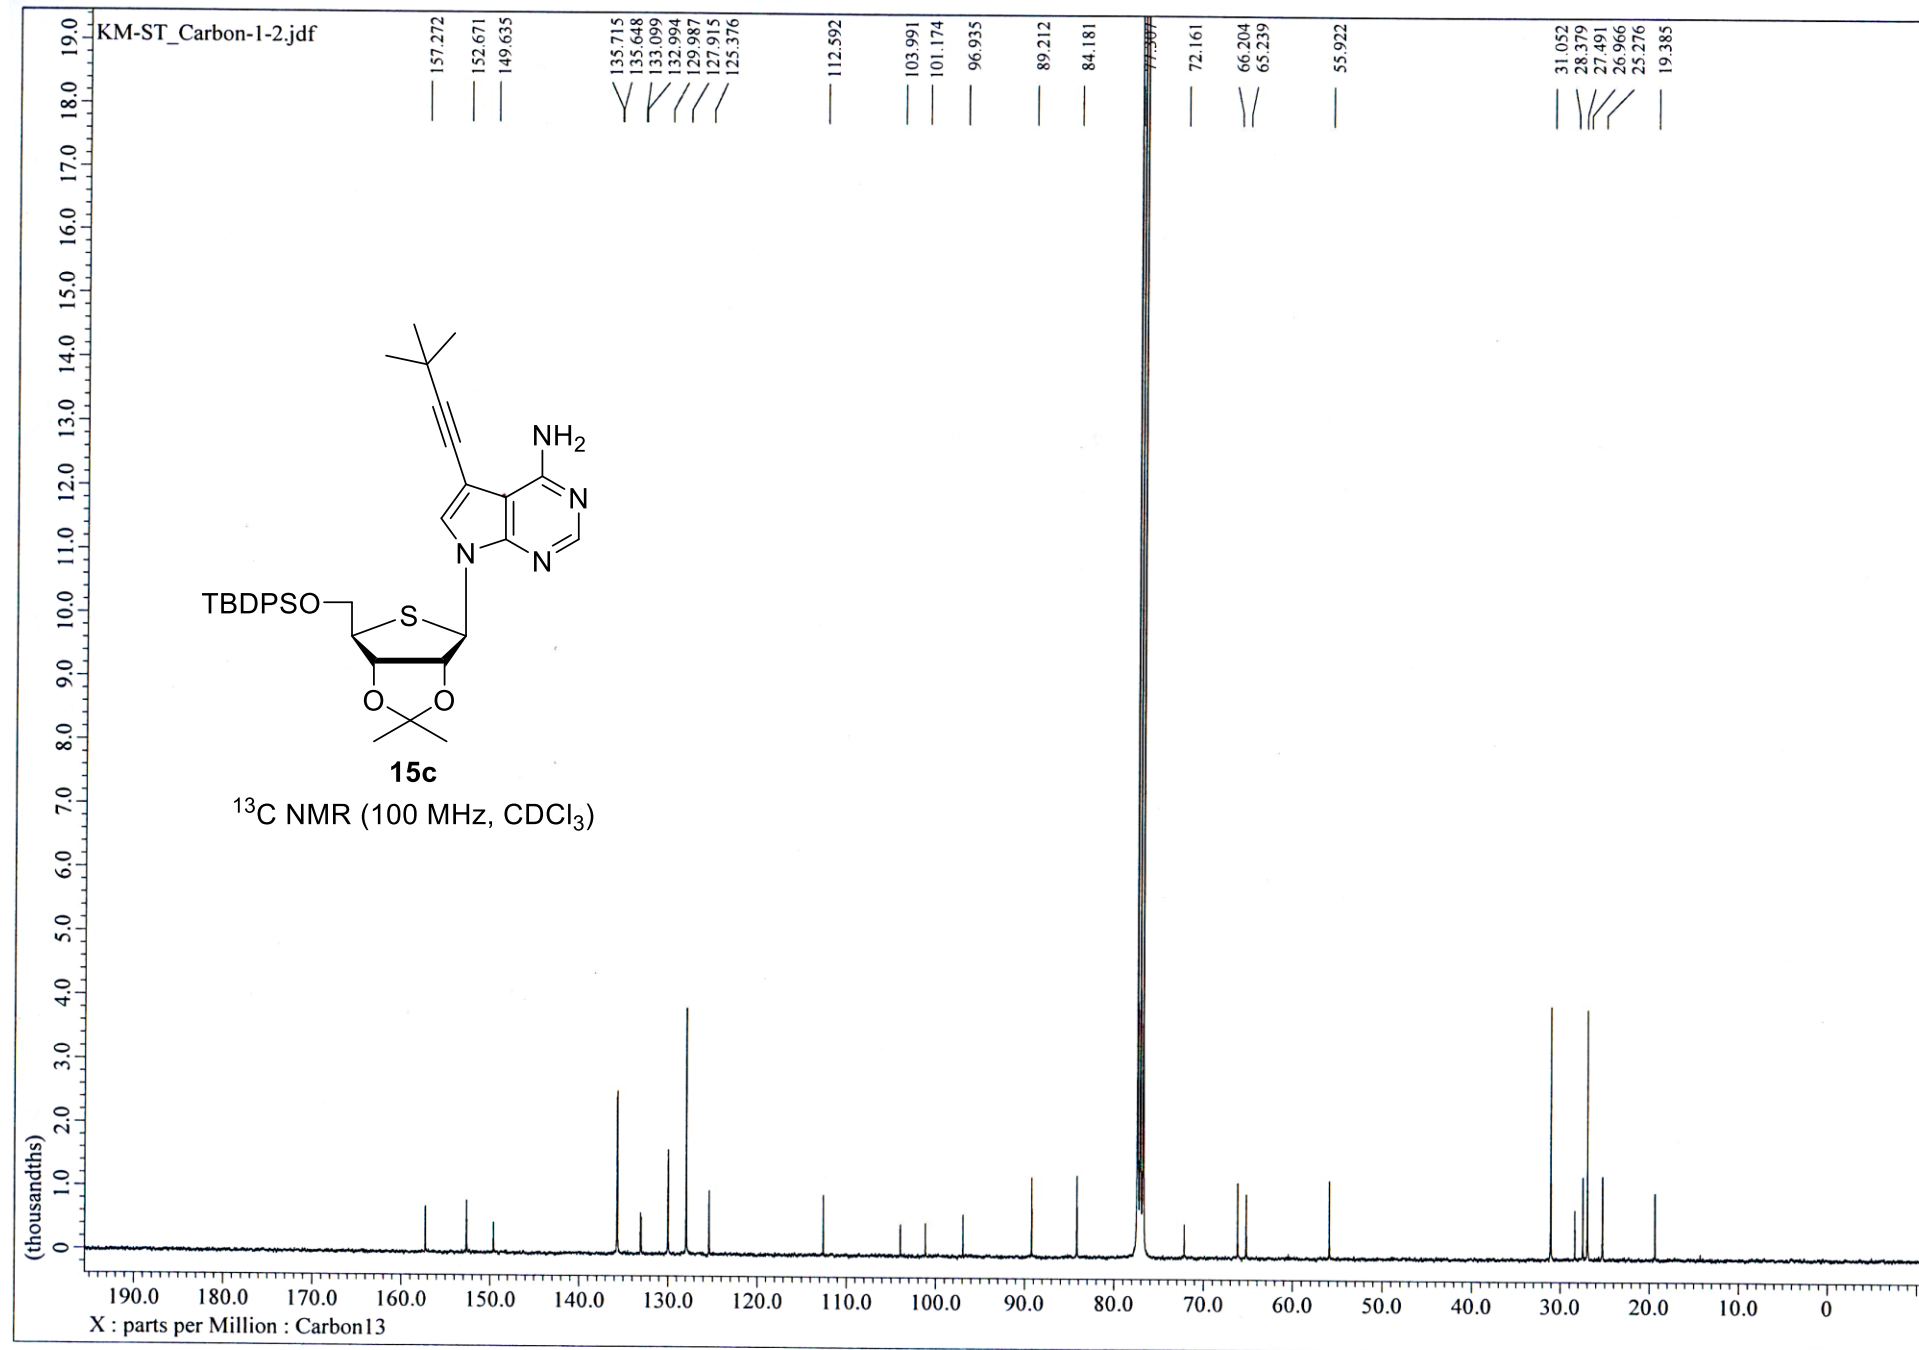

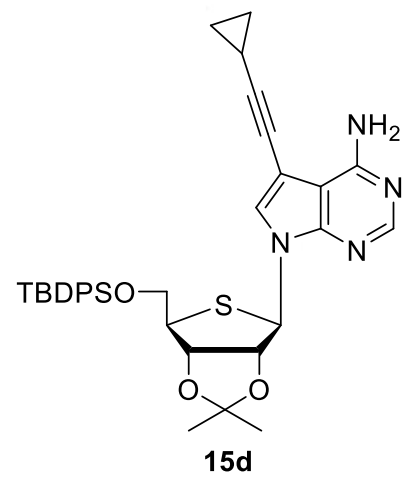

$^1\text{H}$  NMR (400 MHz,  $\text{CDCl}_3$ )

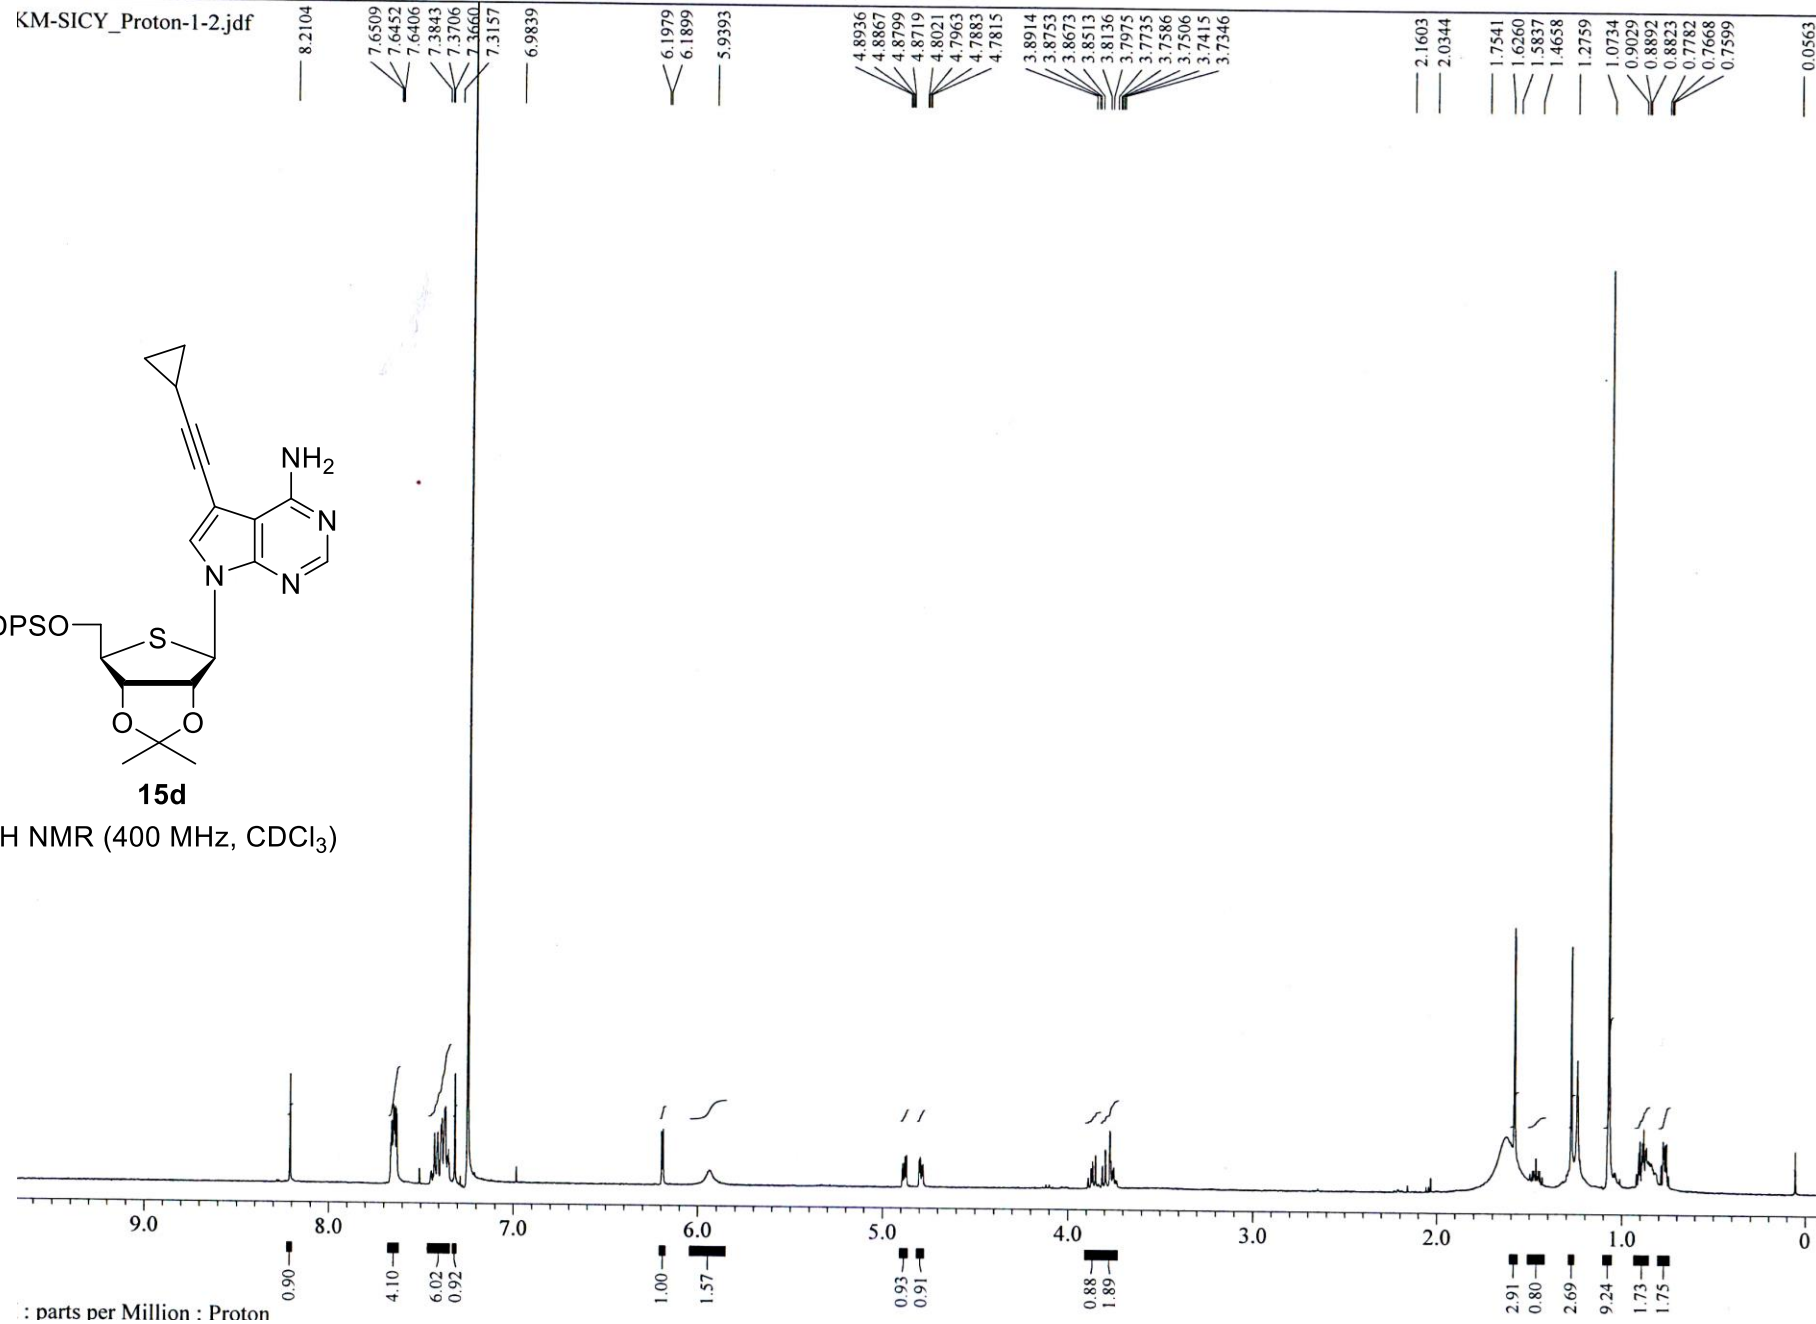

3y\_Carbon-1-3.jdf

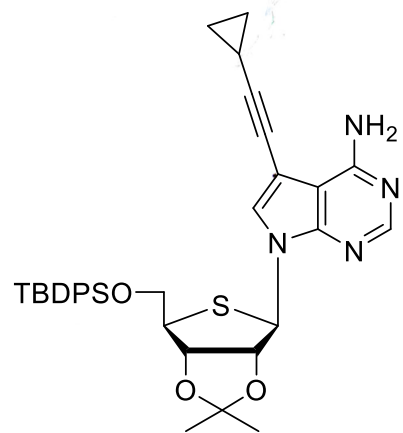

**15d**

$^{13}\text{C}$  NMR (100 MHz,  $\text{CDCl}_3$ )

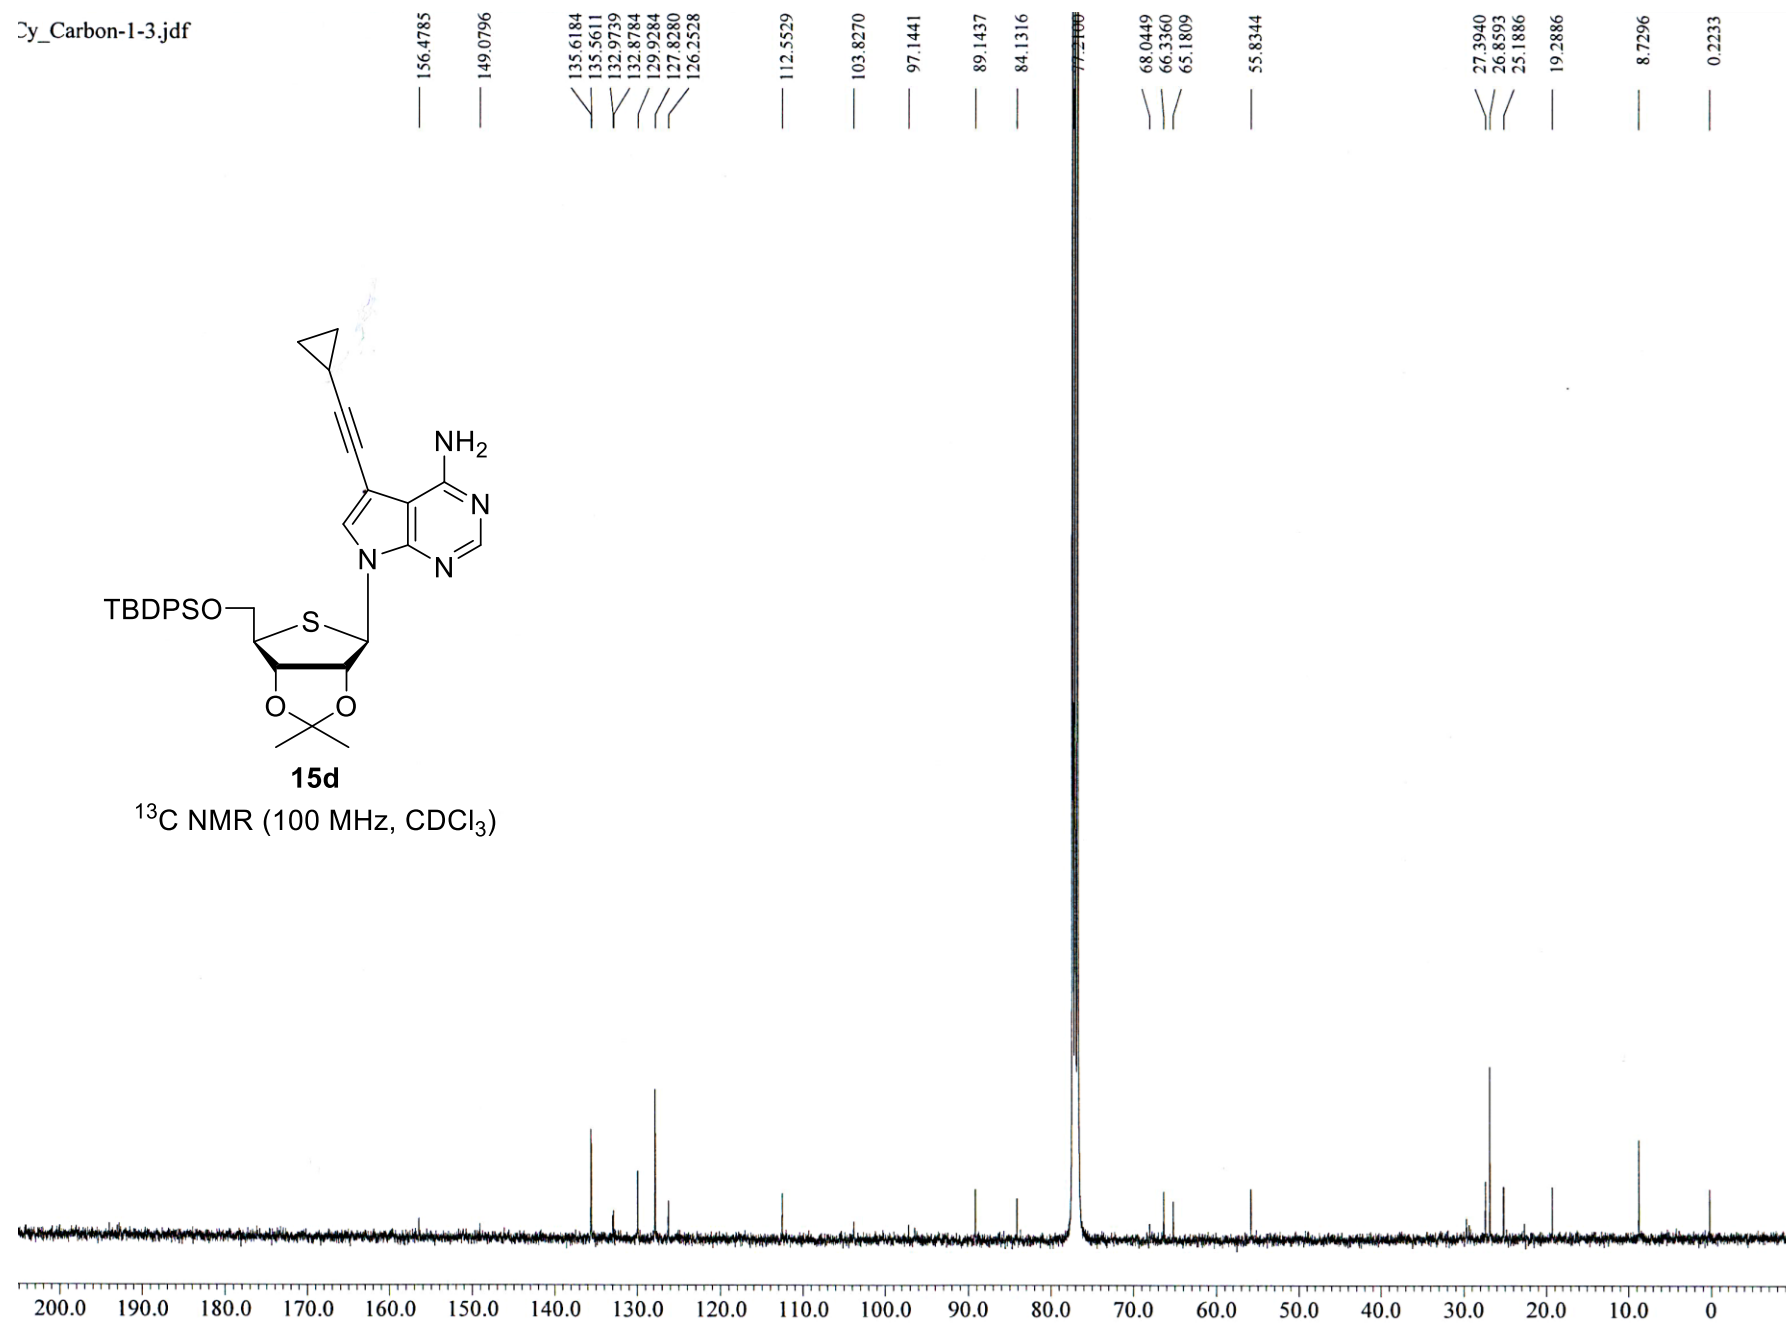

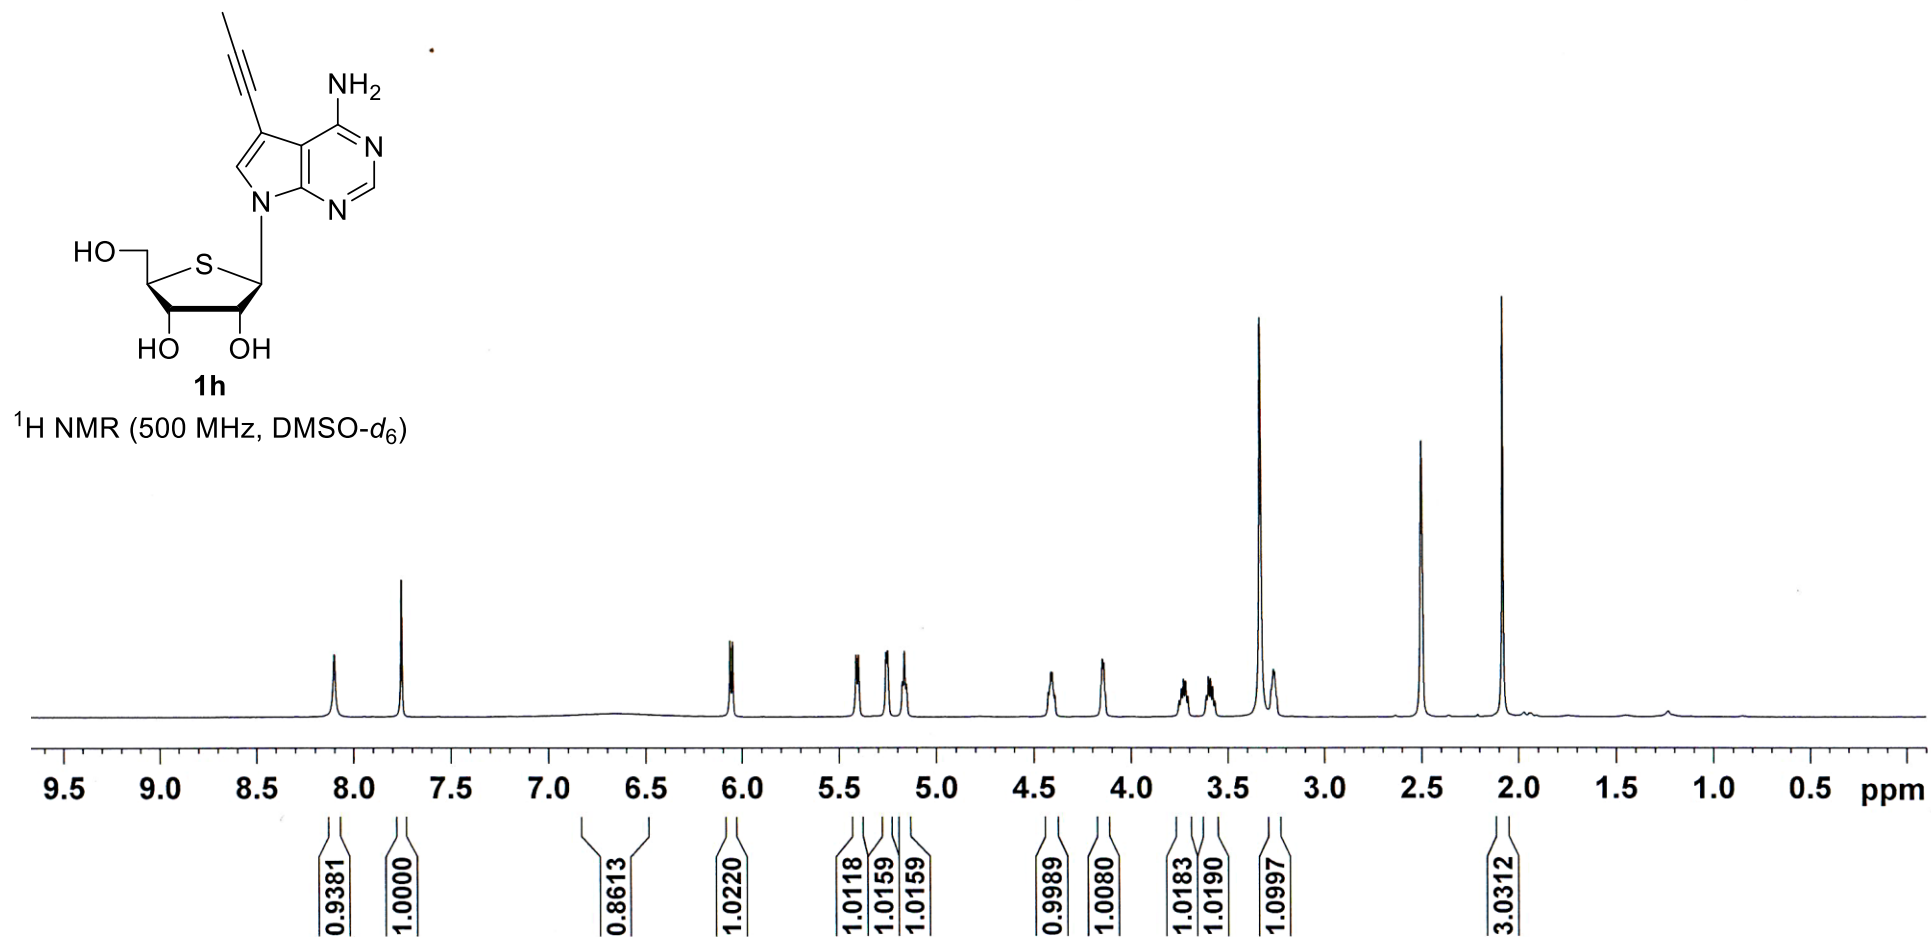



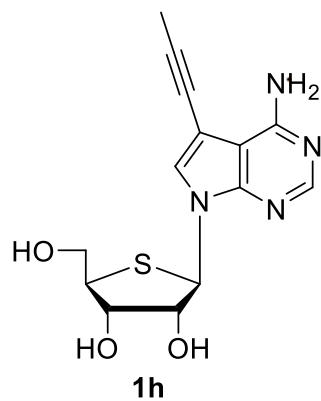

$^{13}\text{C}$  NMR (125 MHz,  $\text{DMSO-}d_6$ )

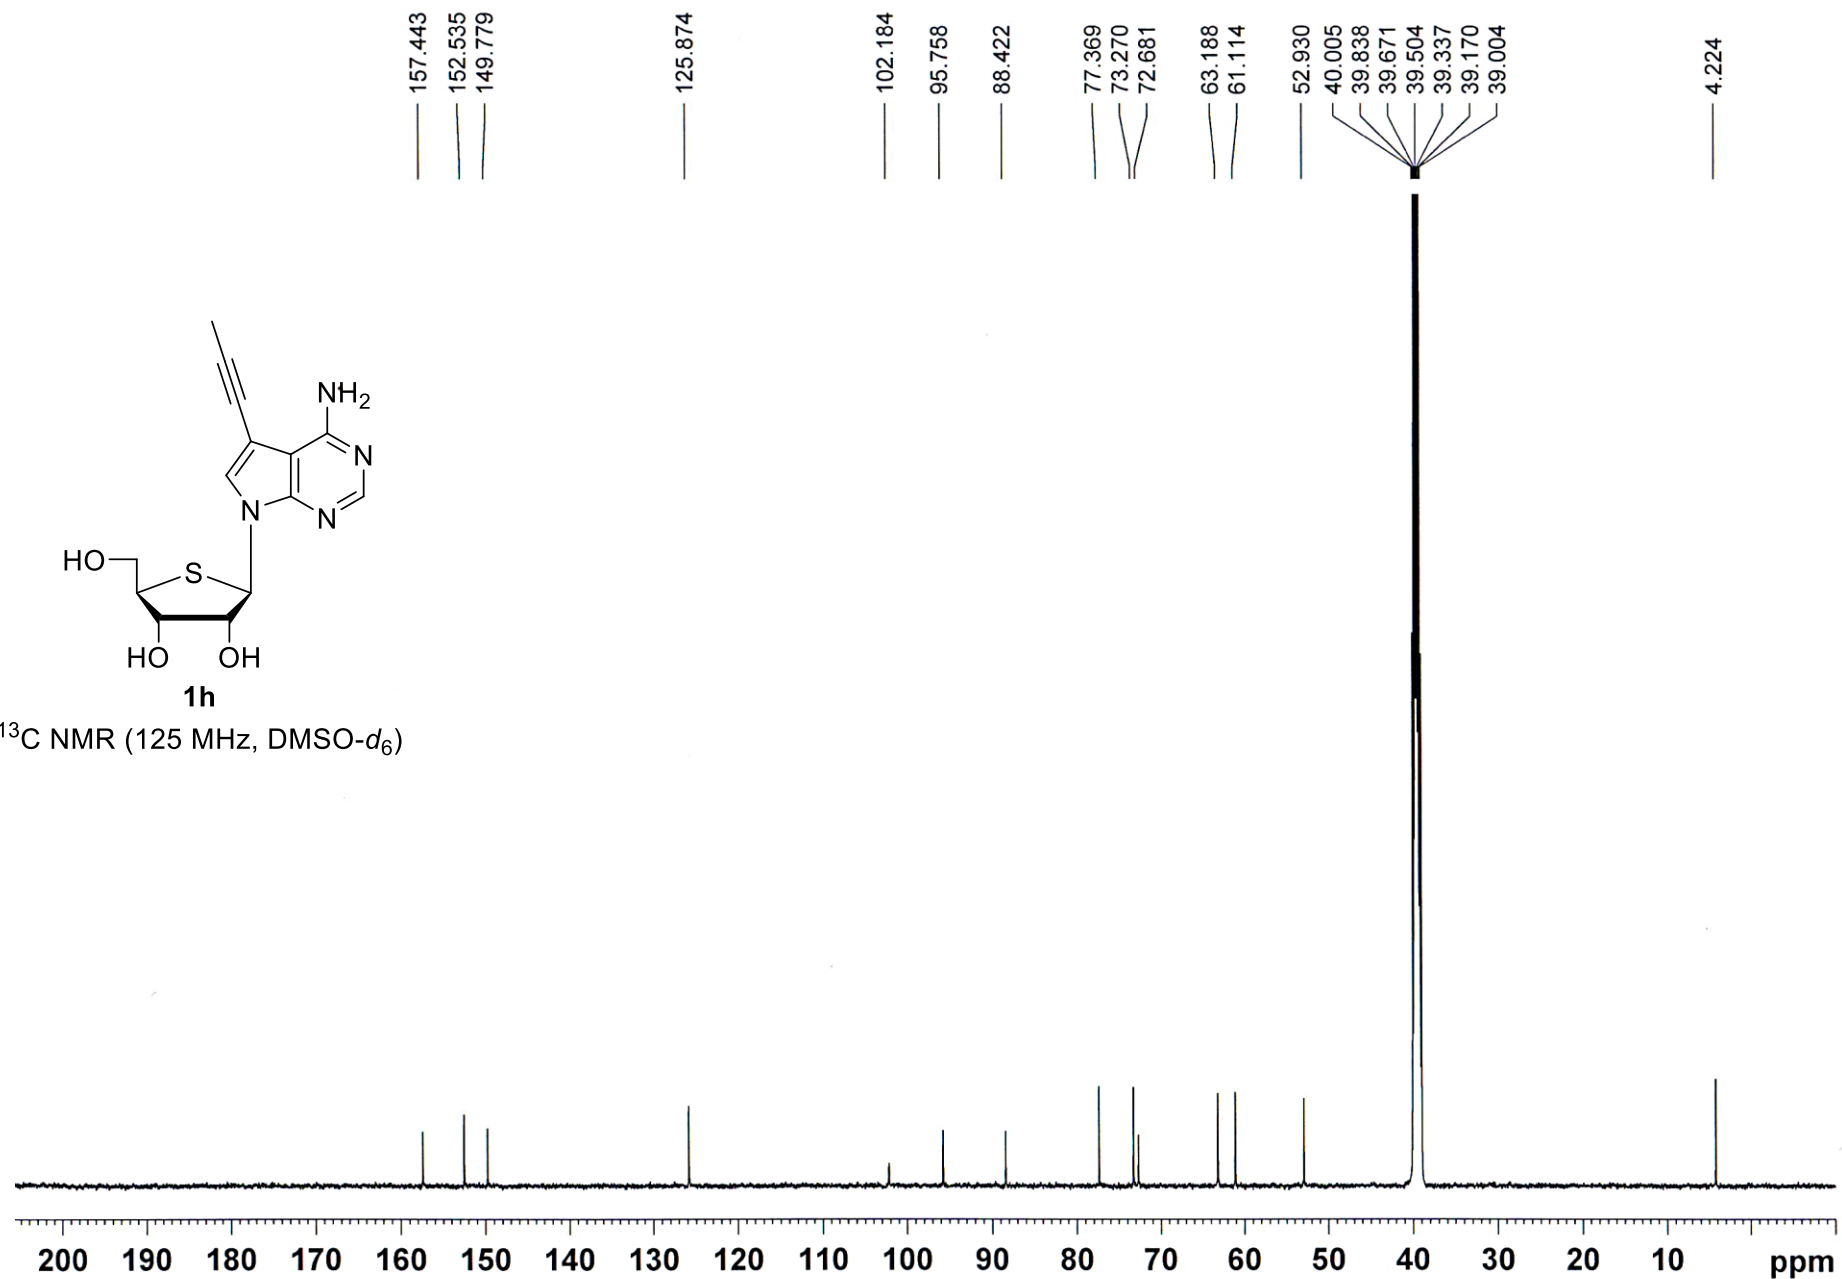

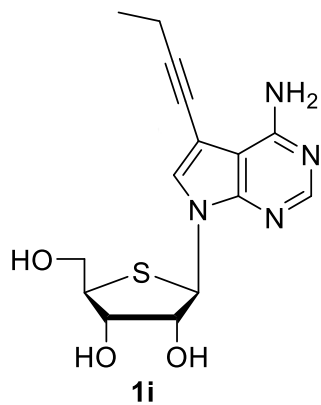

$^1\text{H}$  NMR (500 MHz,  $\text{DMSO-}d_6$ )

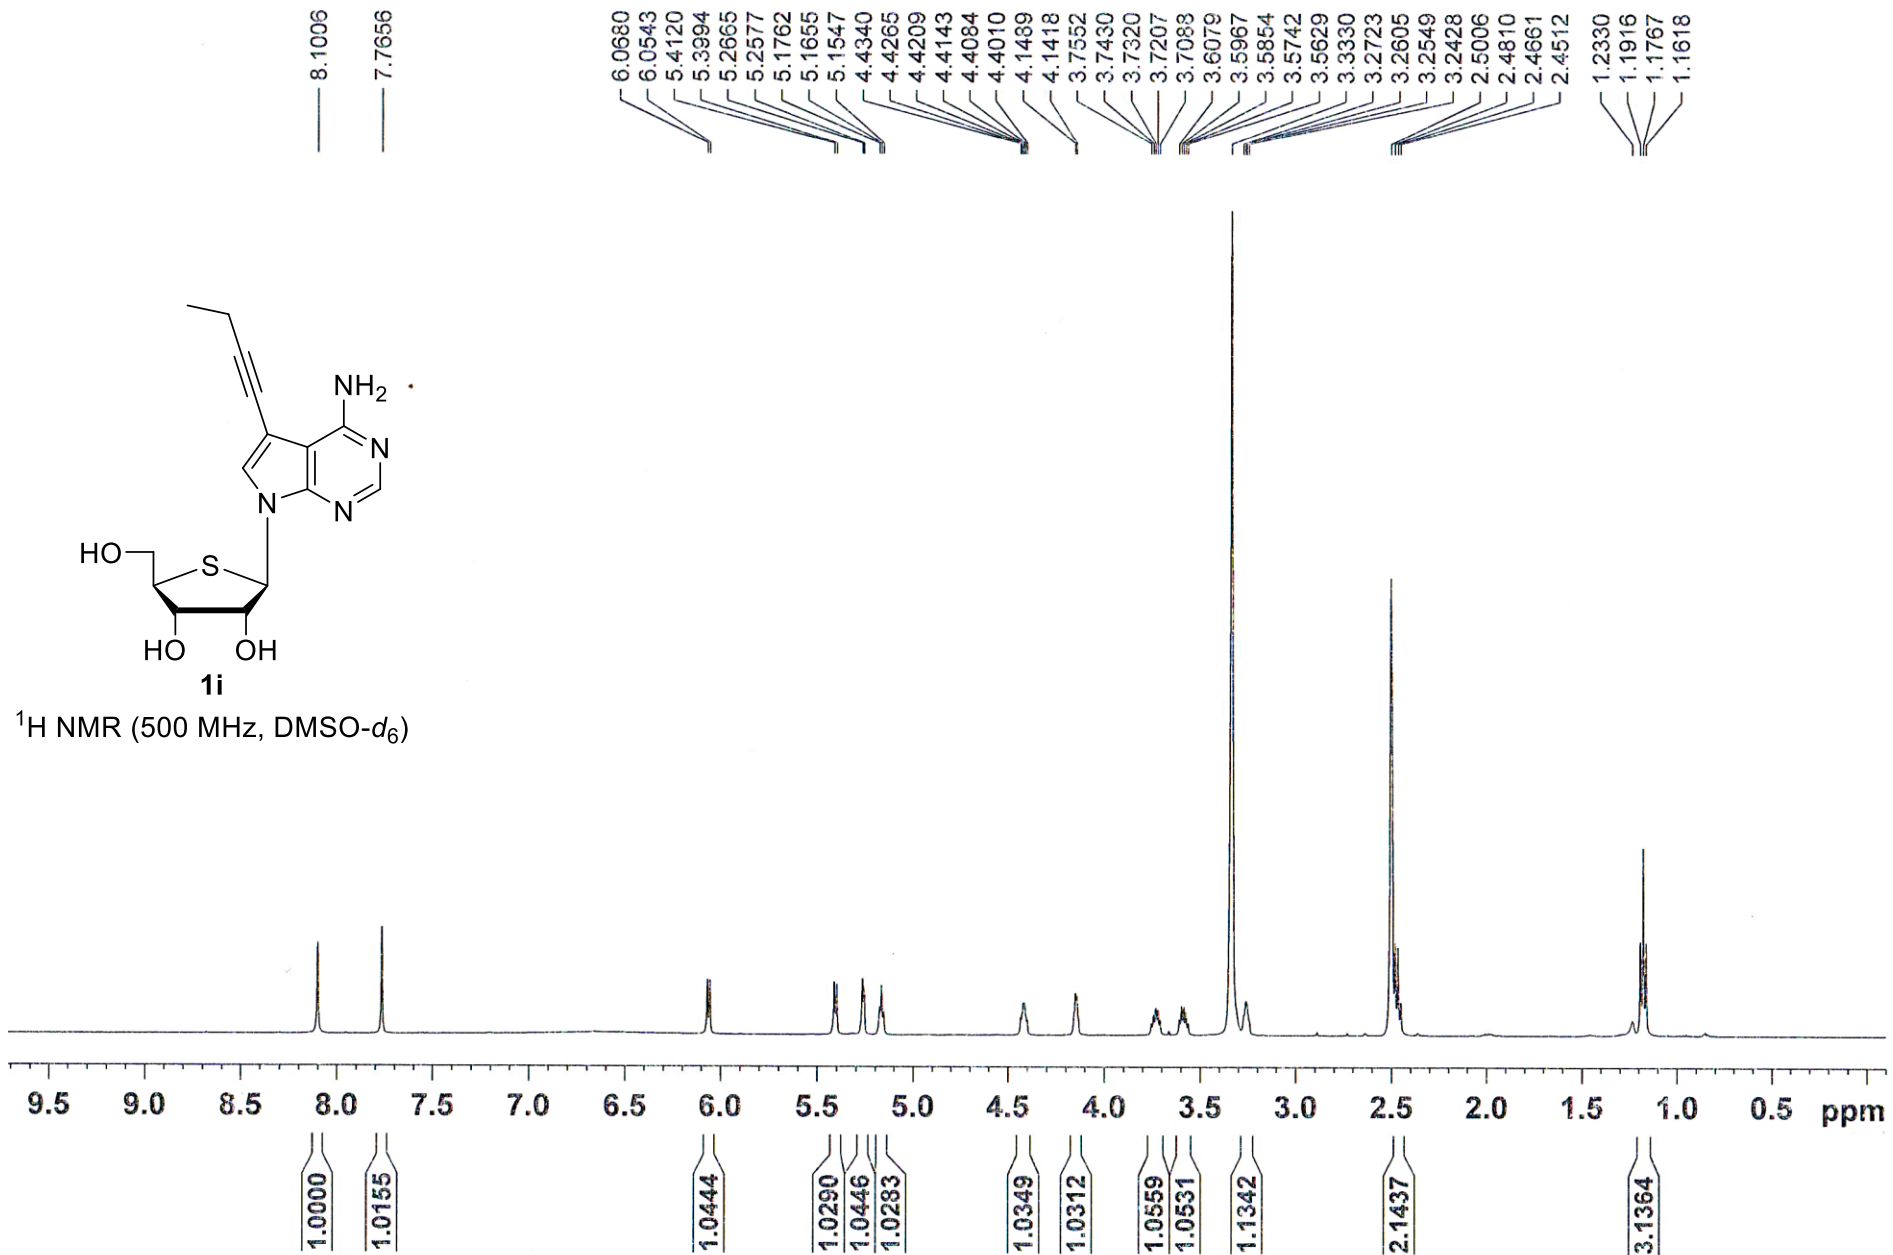

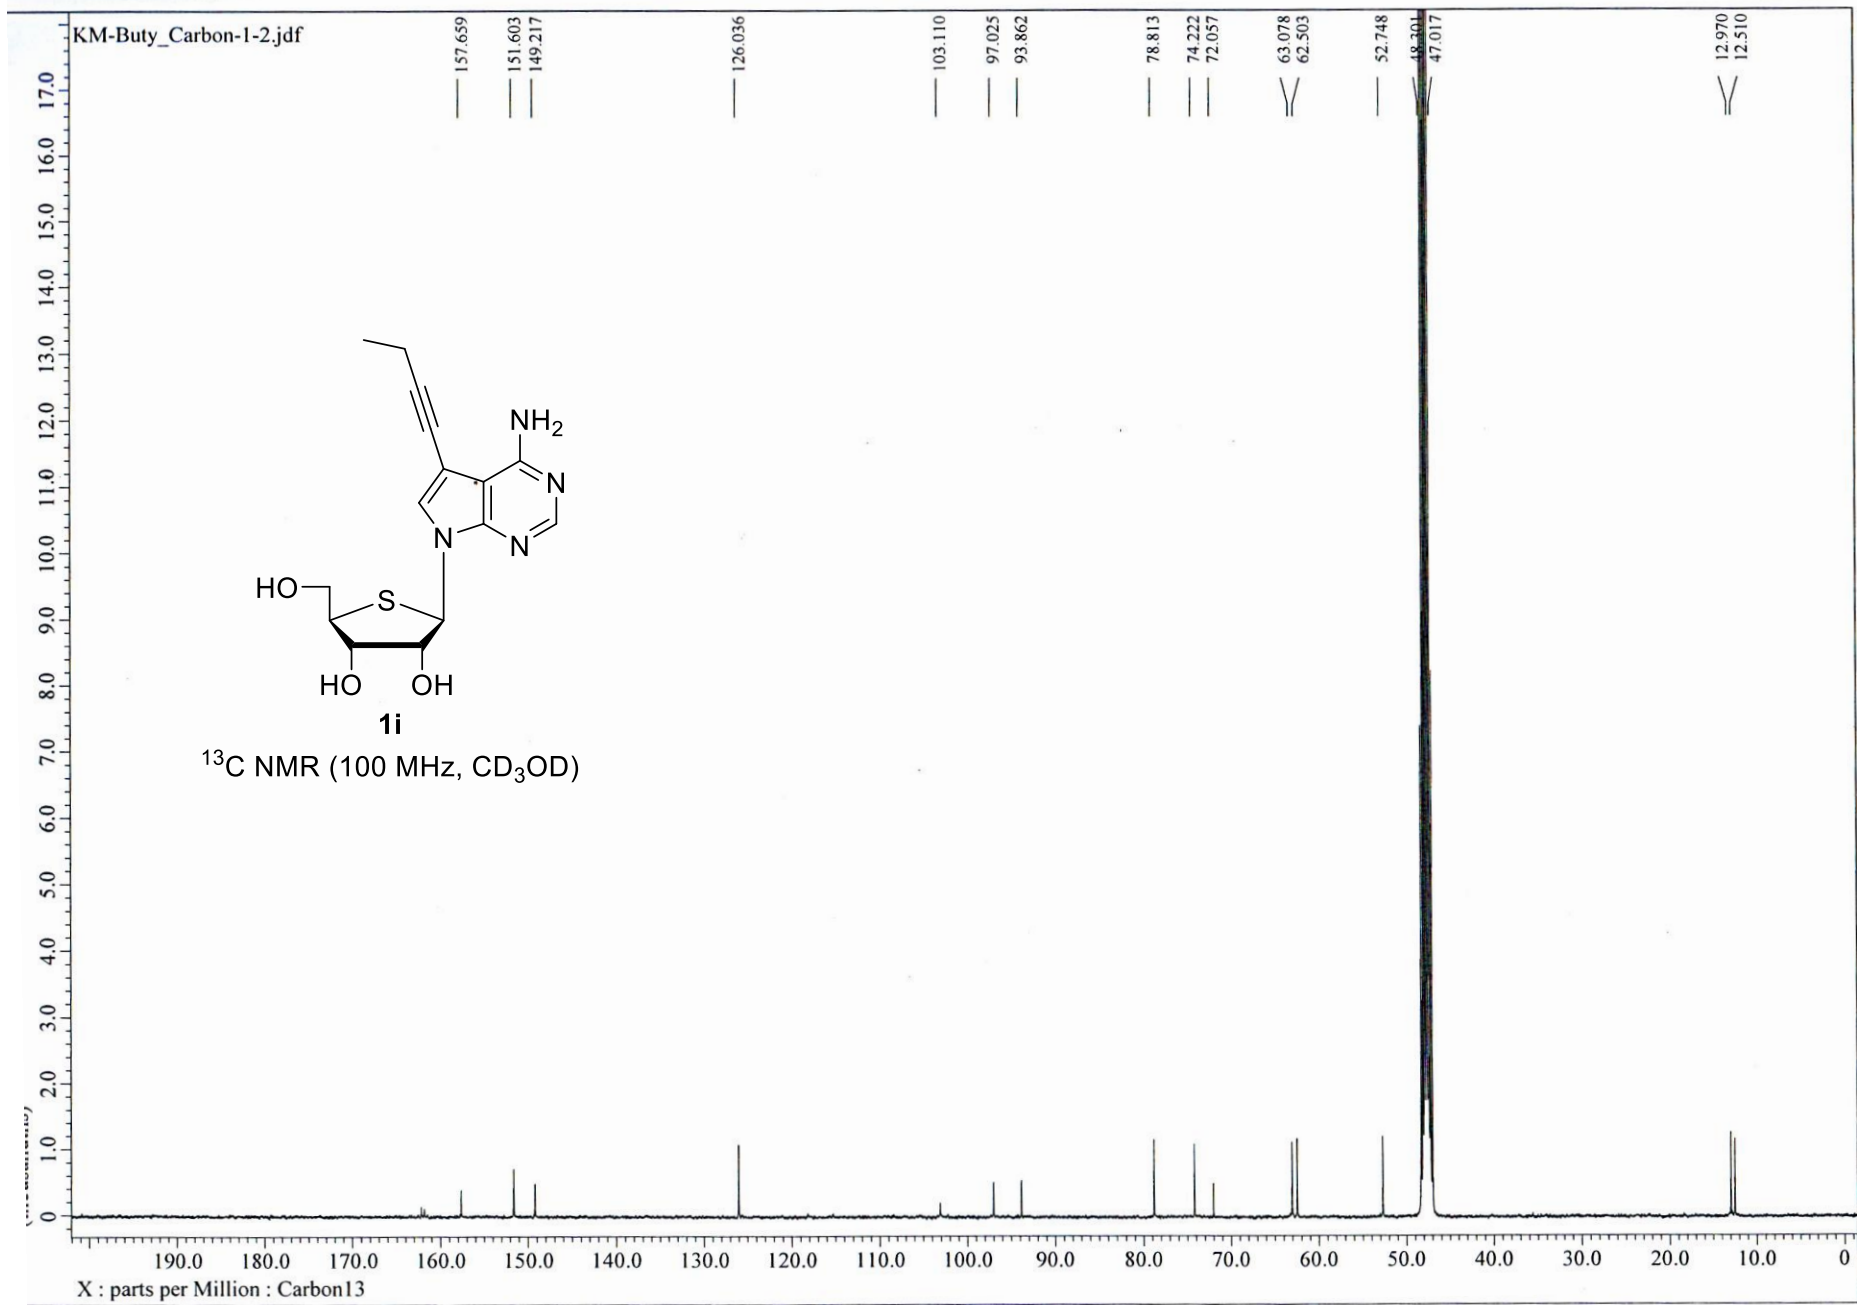

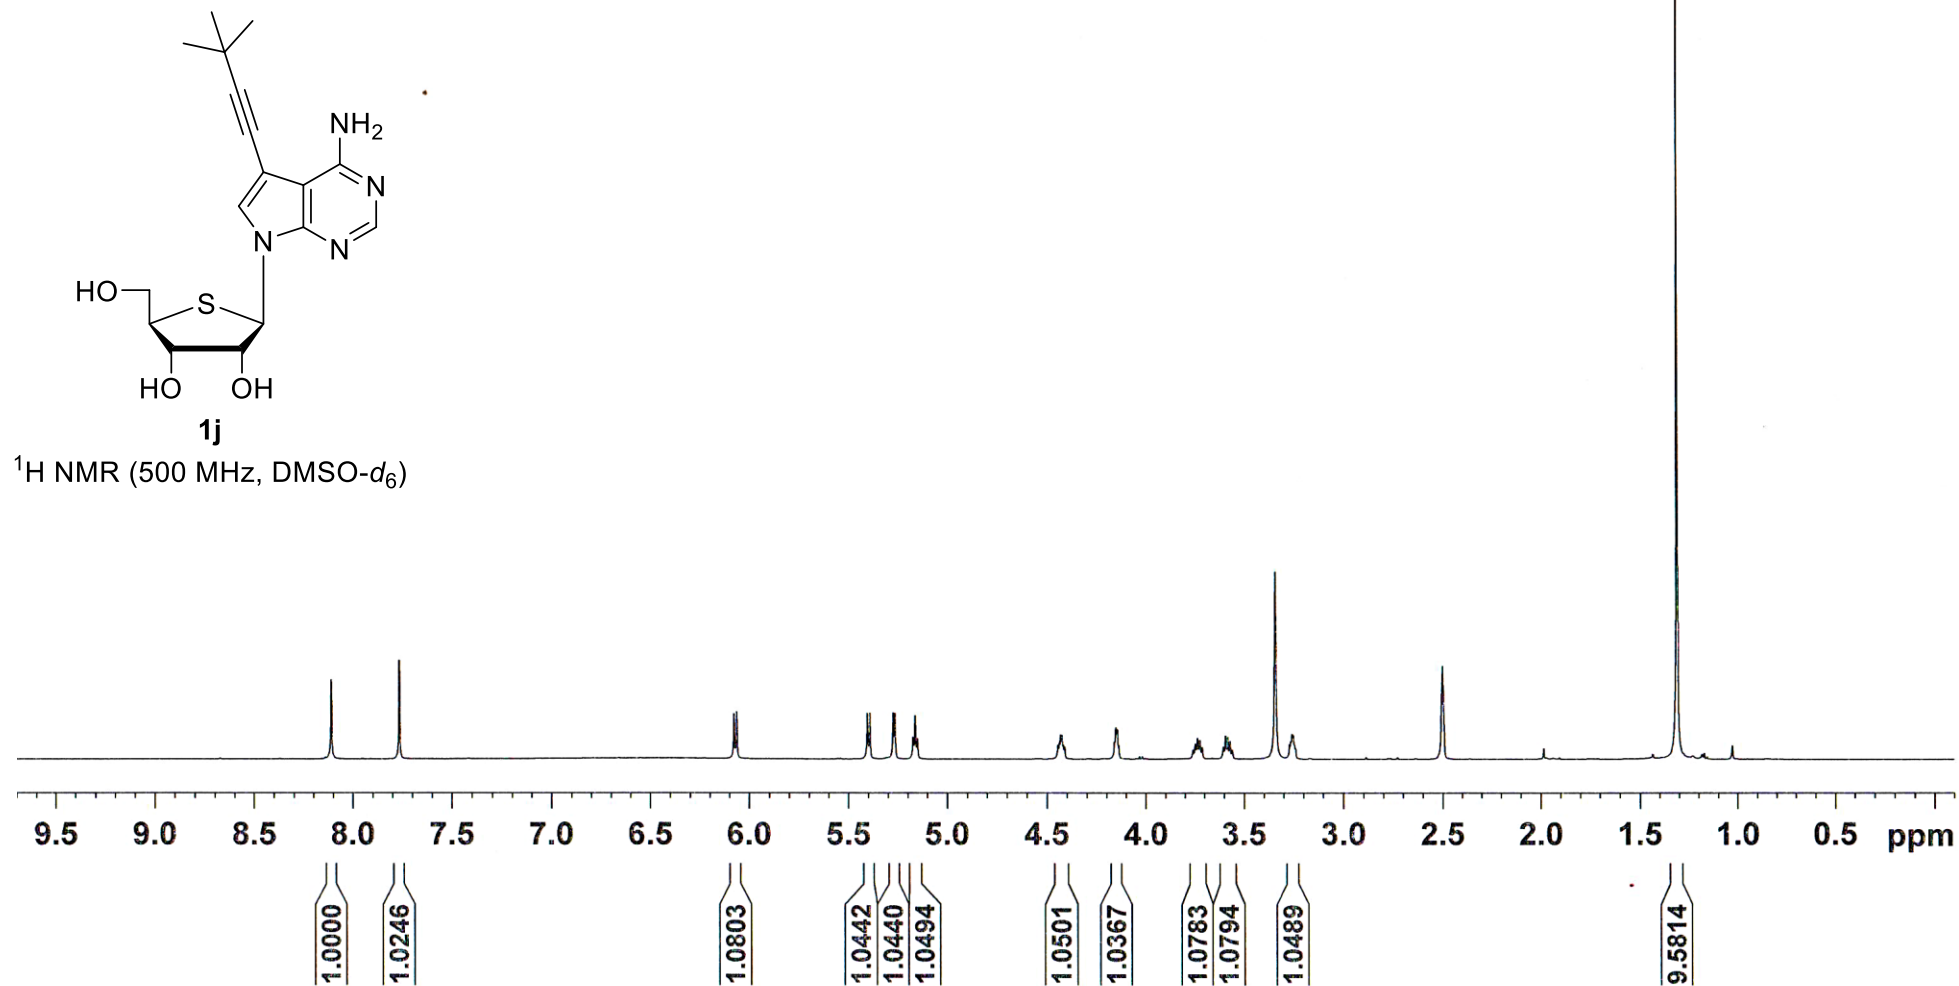

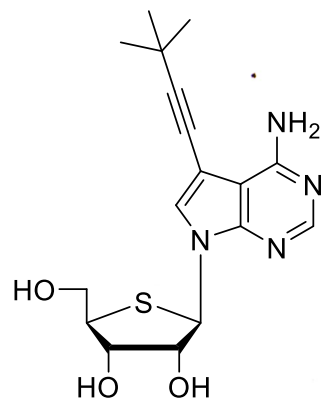

**1j**

$^{13}\text{C}$  NMR (100 MHz,  $\text{DMSO}-d_6$ )

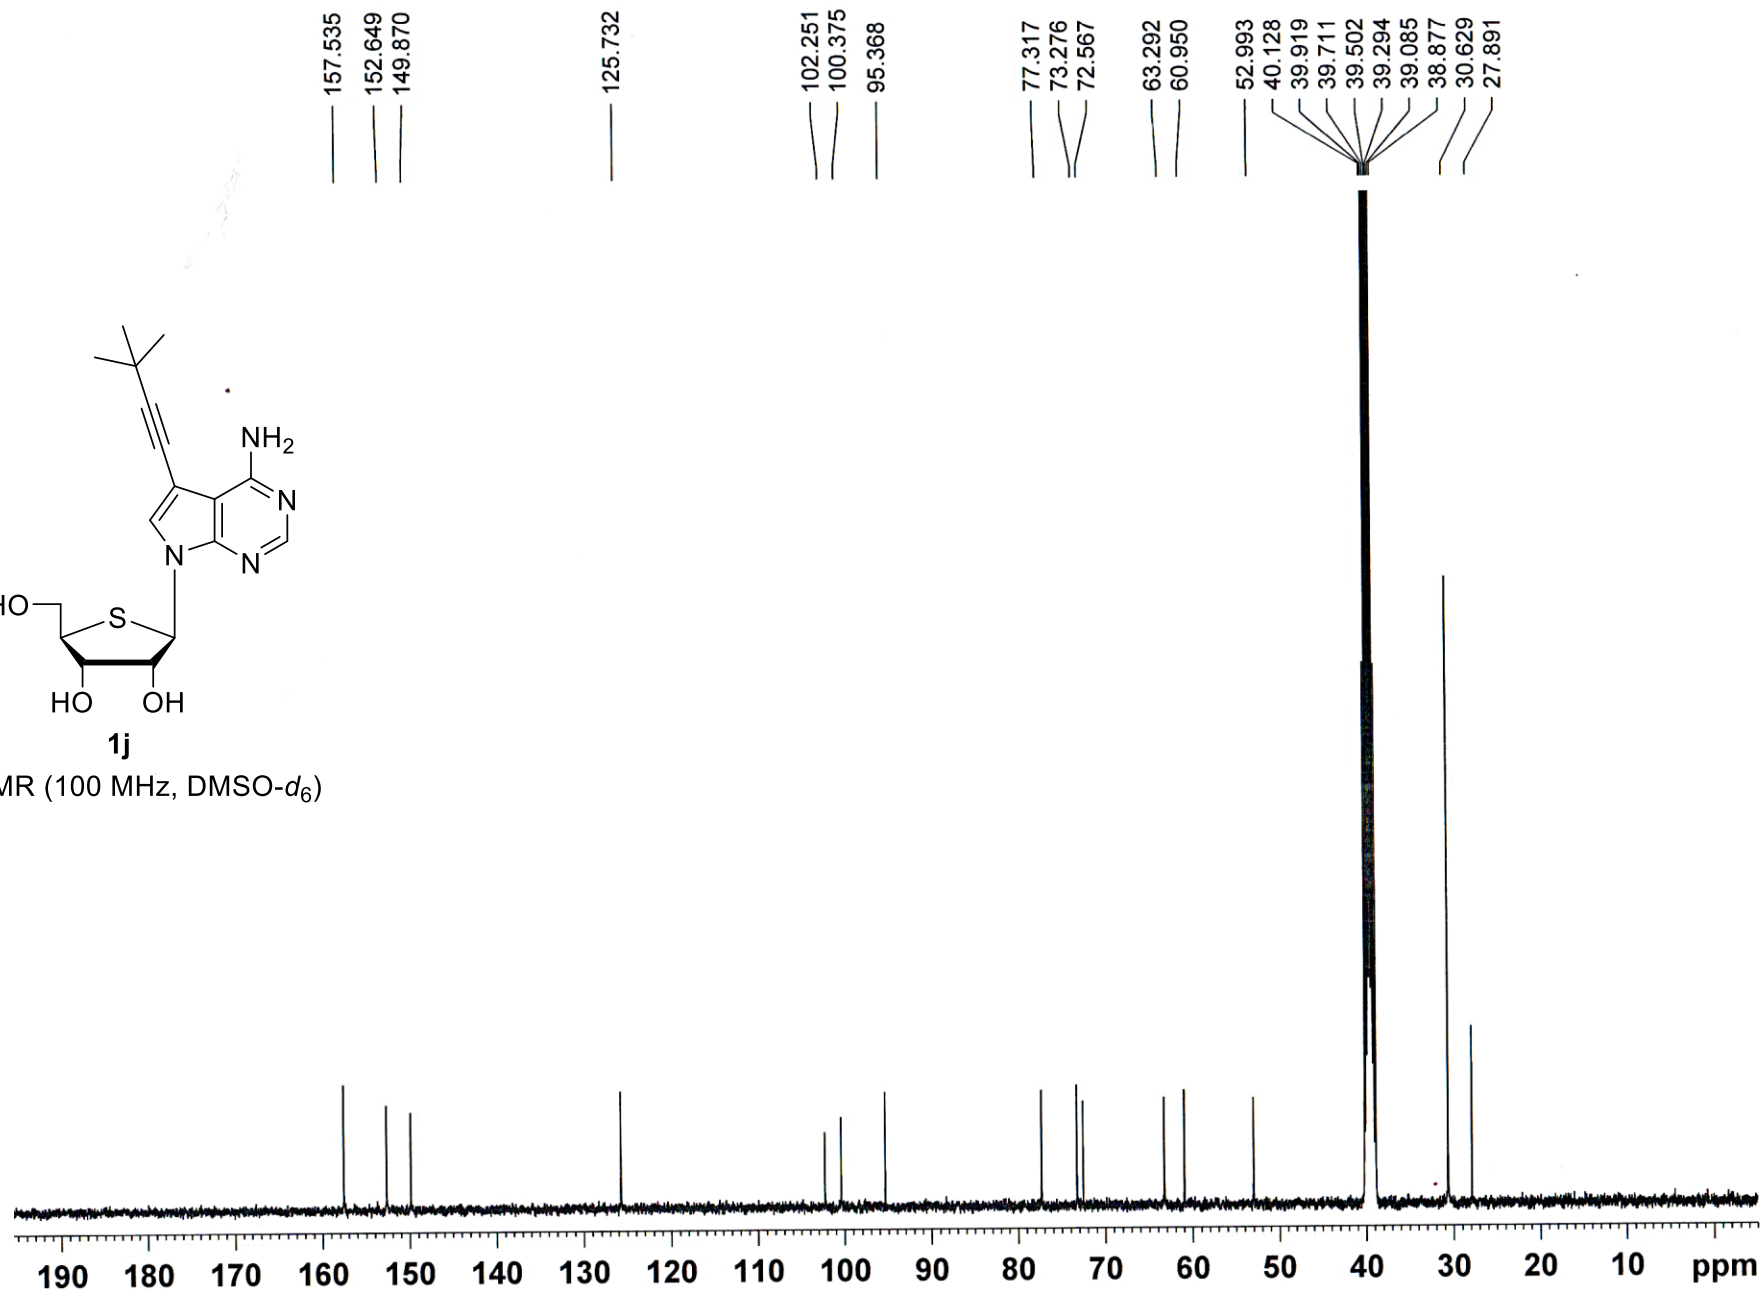

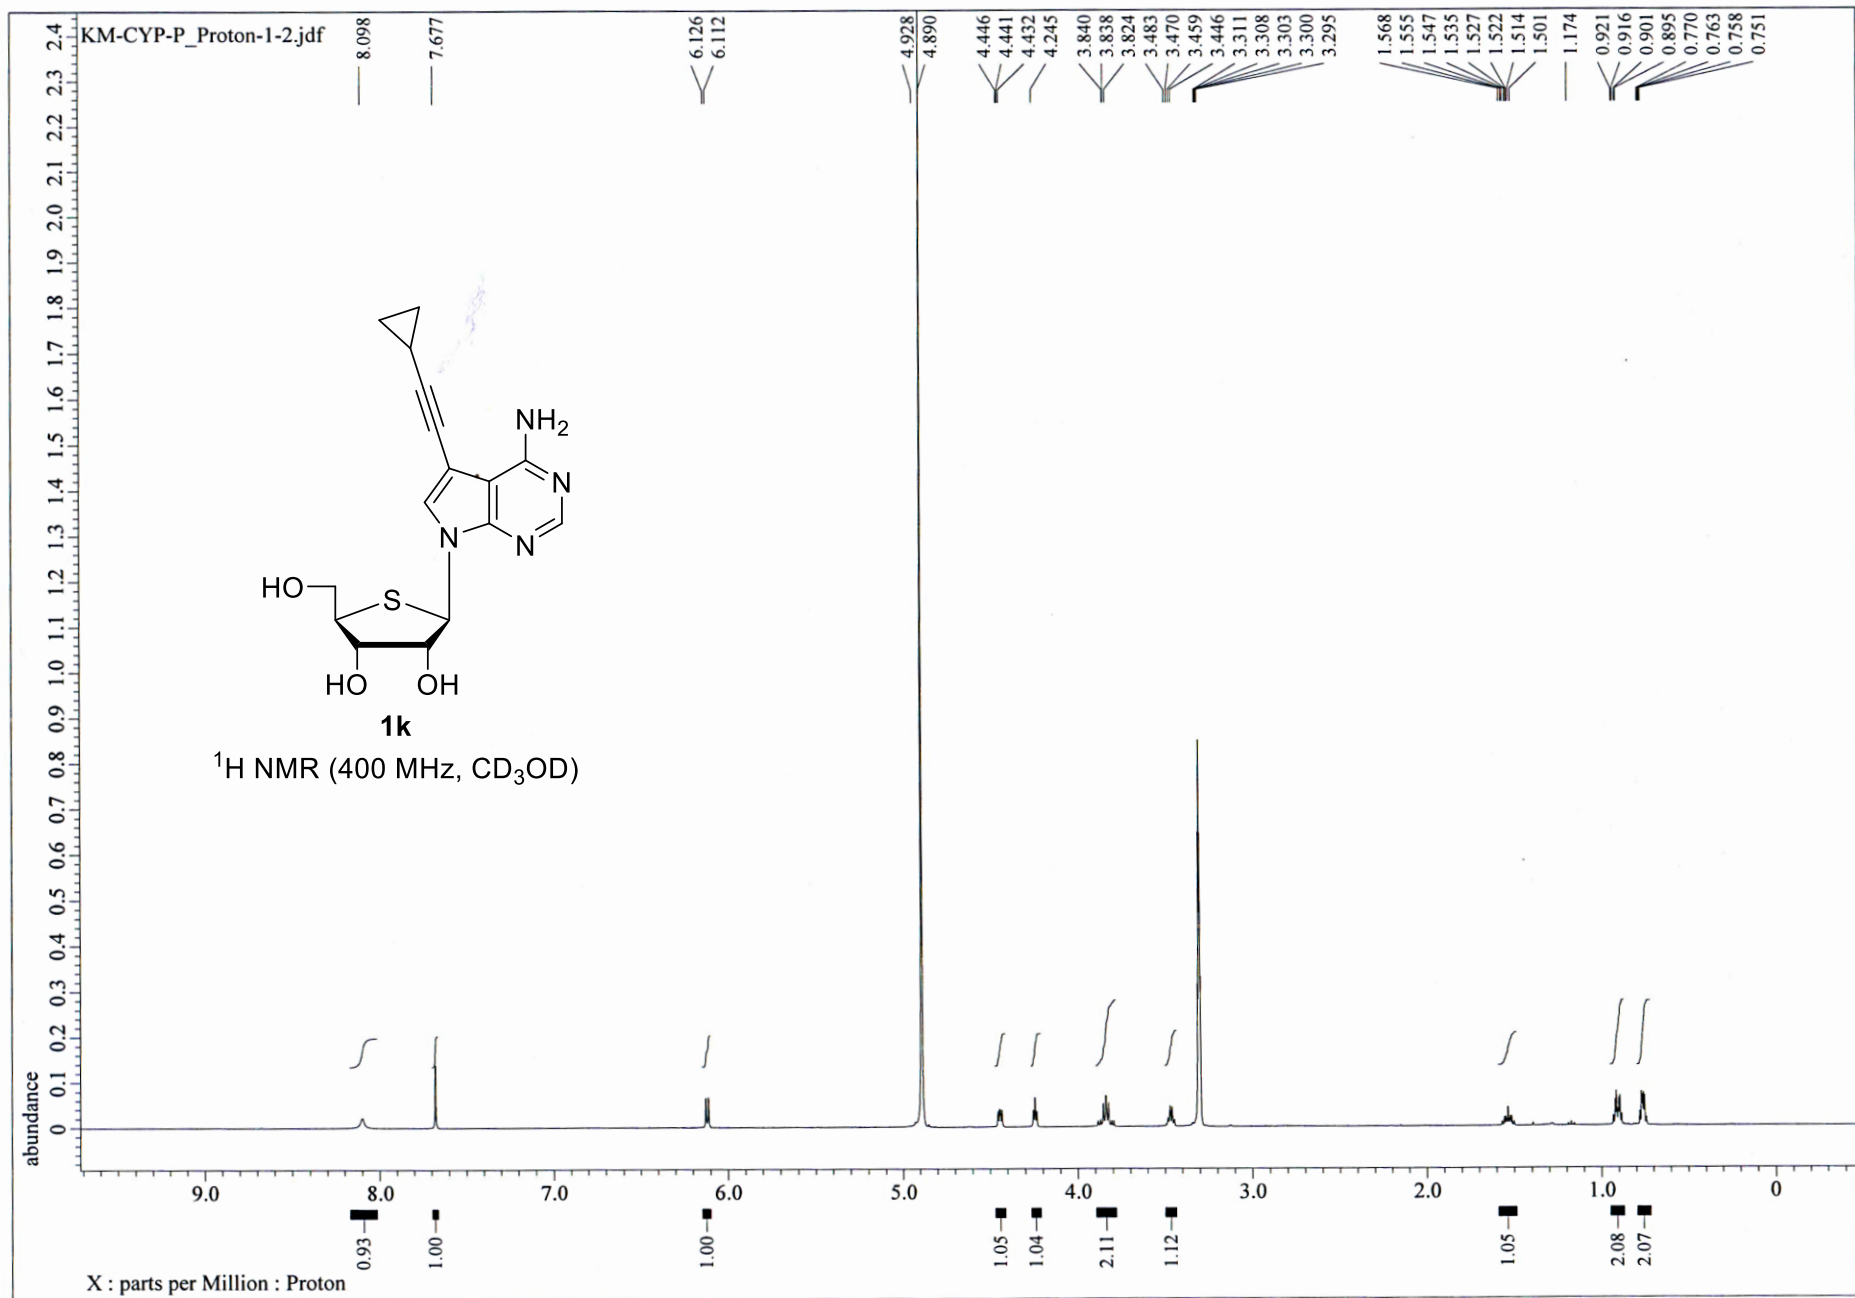

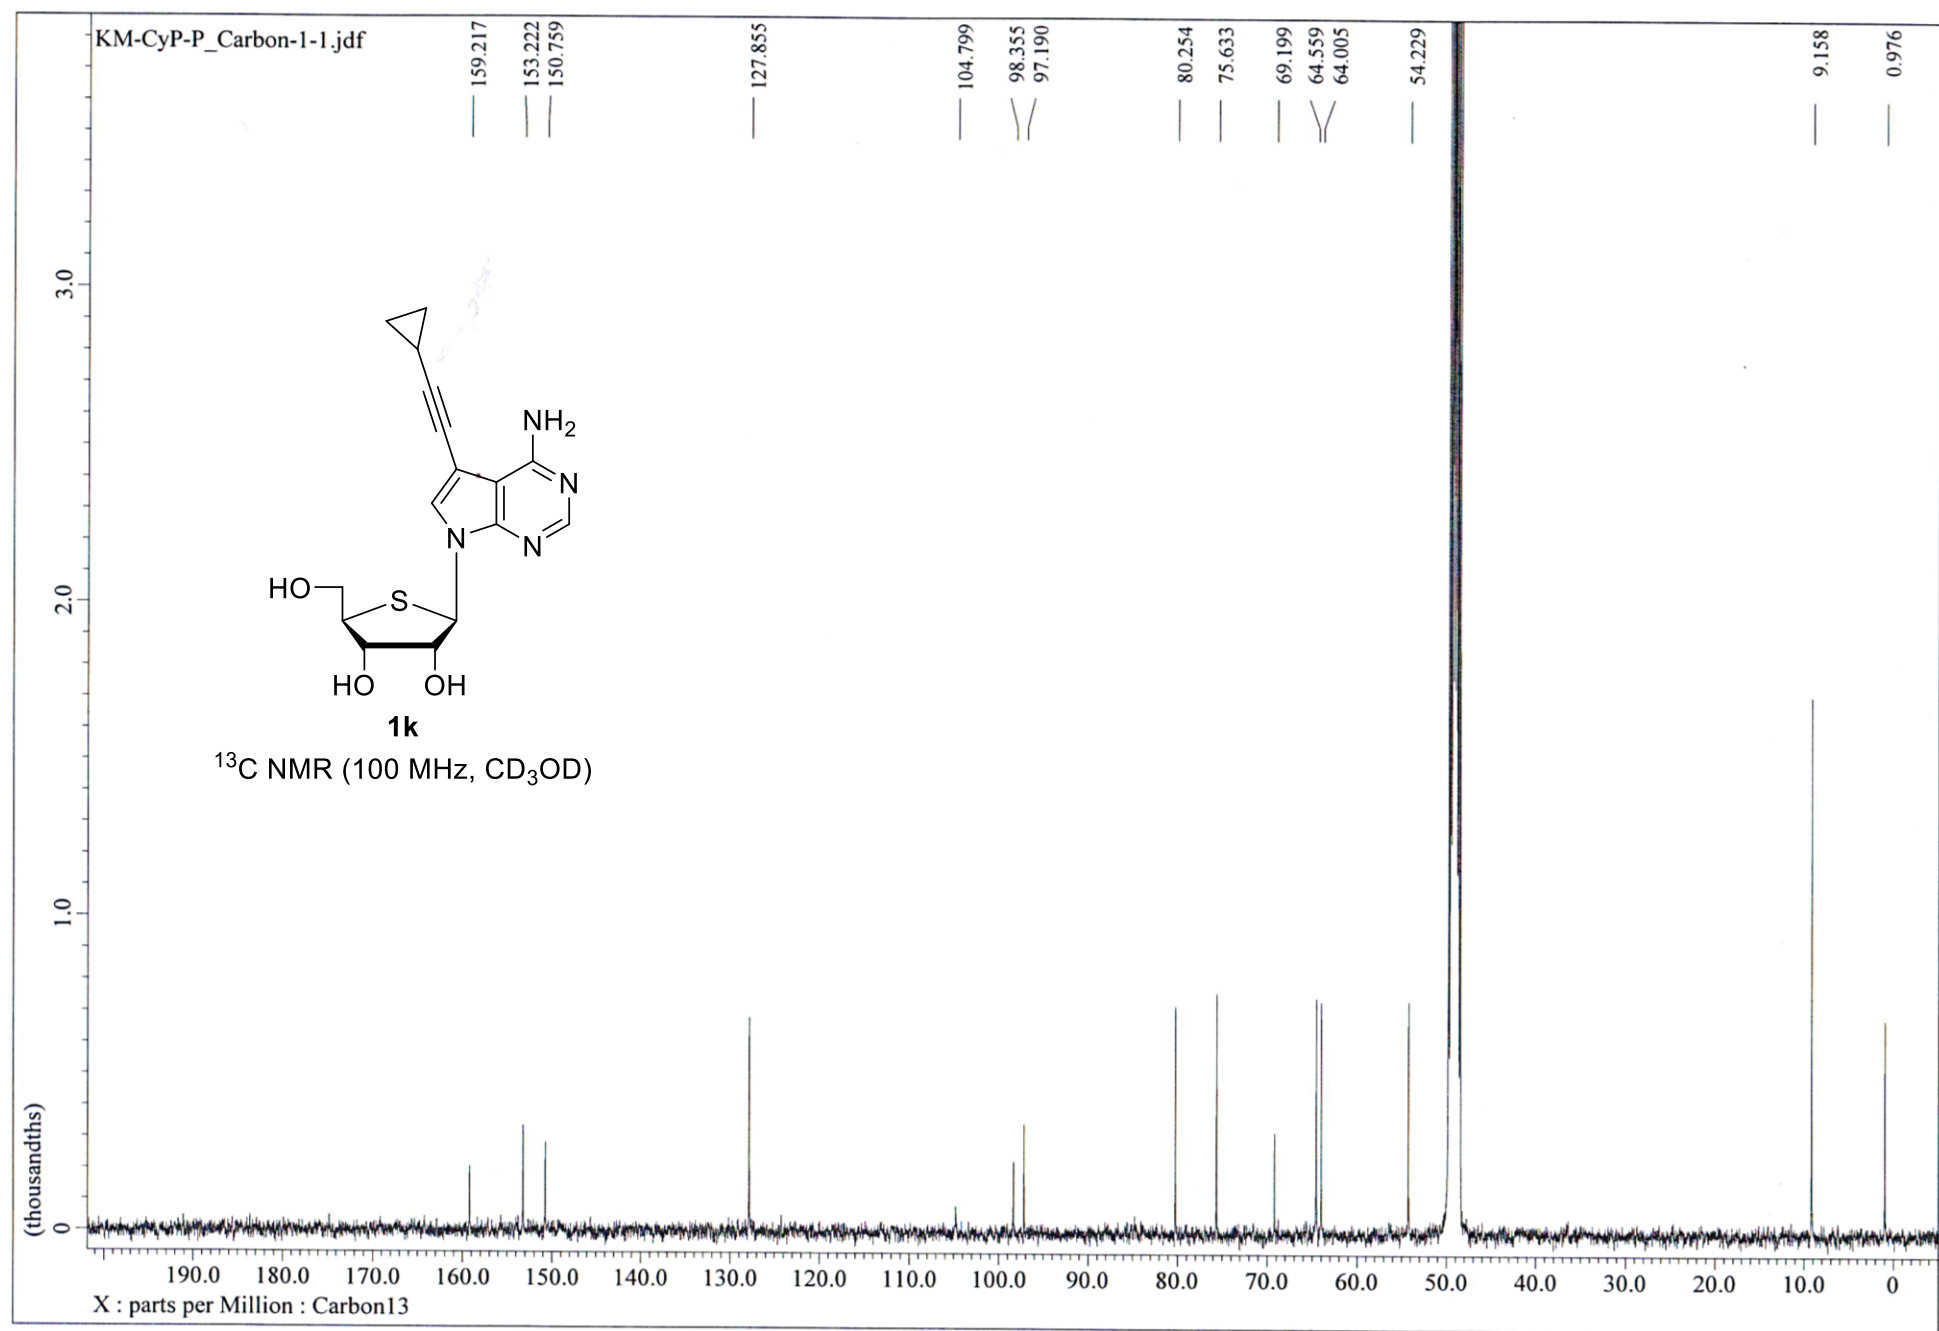

# HRMS (ESI-Q-TOF) data for compound 1g

## Qualitative Compound Report

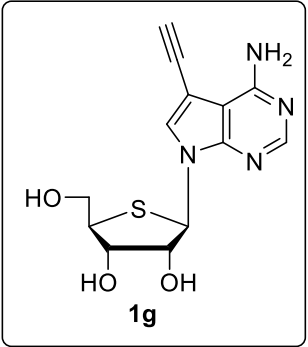

MS Zoomed Spectrum

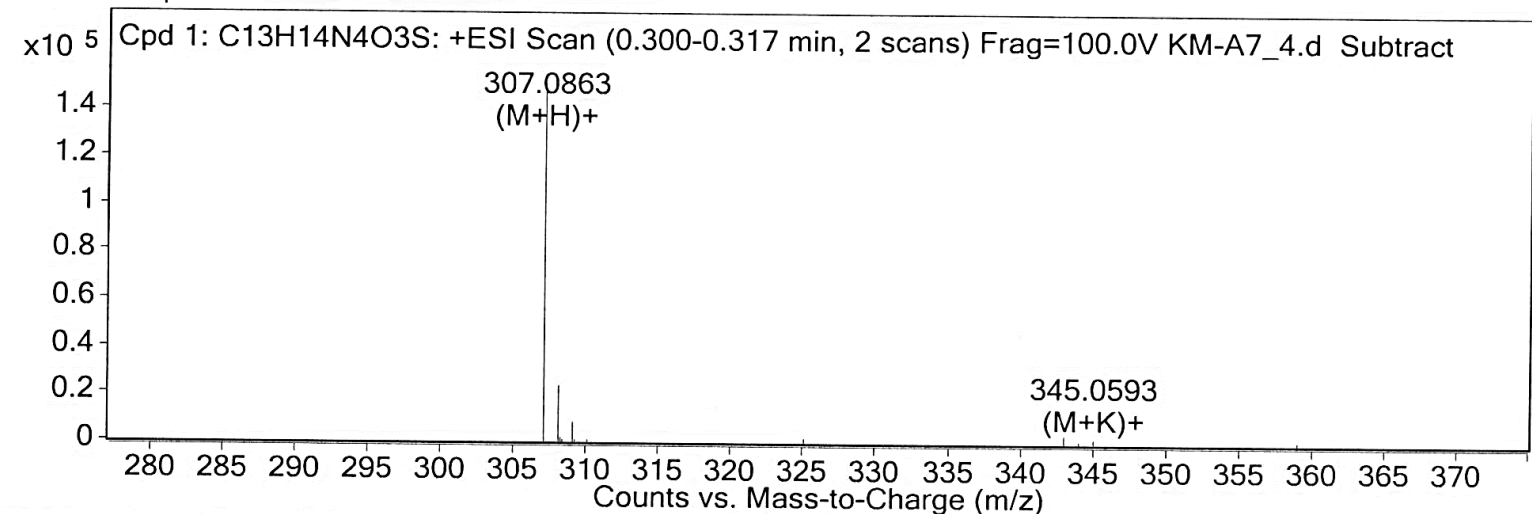

MS Spectrum Peak List

| <i>m/z</i> | <i>Calc m/z</i> | Diff(ppm) | <i>z</i> | Abund  | Formula                                                           | Ion                |
|------------|-----------------|-----------|----------|--------|-------------------------------------------------------------------|--------------------|
| 307.0863   | 307.0859        | 1.05      |          | 149838 | C <sub>13</sub> H <sub>15</sub> N <sub>4</sub> O <sub>3</sub> S   | (M+H) <sup>+</sup> |
| 308.0893   | 308.0886        | 2.17      |          | 23738  | C <sub>13</sub> H <sub>15</sub> N <sub>4</sub> O <sub>3</sub> S   | (M+H) <sup>+</sup> |
| 308.2138   |                 |           |          | 1455   |                                                                   |                    |
| 308.2503   |                 |           |          | 999    |                                                                   |                    |
| 308.292    |                 |           |          | 632    |                                                                   |                    |
| 308.3751   |                 |           |          | 516    |                                                                   |                    |
| 309.0846   | 309.0845        | 0.48      |          | 8038   | C <sub>13</sub> H <sub>15</sub> N <sub>4</sub> O <sub>3</sub> S   | (M+H) <sup>+</sup> |
| 309.1713   |                 |           |          | 938    |                                                                   |                    |
| 310.0859   | 310.0862        | -0.95     |          | 1185   | C <sub>13</sub> H <sub>15</sub> N <sub>4</sub> O <sub>3</sub> S   | (M+H) <sup>+</sup> |
| 345.0593   | 345.0418        | 50.81     | 1        | 1552   | C <sub>13</sub> H <sub>14</sub> K N <sub>4</sub> O <sub>3</sub> S | (M+K) <sup>+</sup> |



# Single-Crystal X-ray crystallography data for compound **1g**

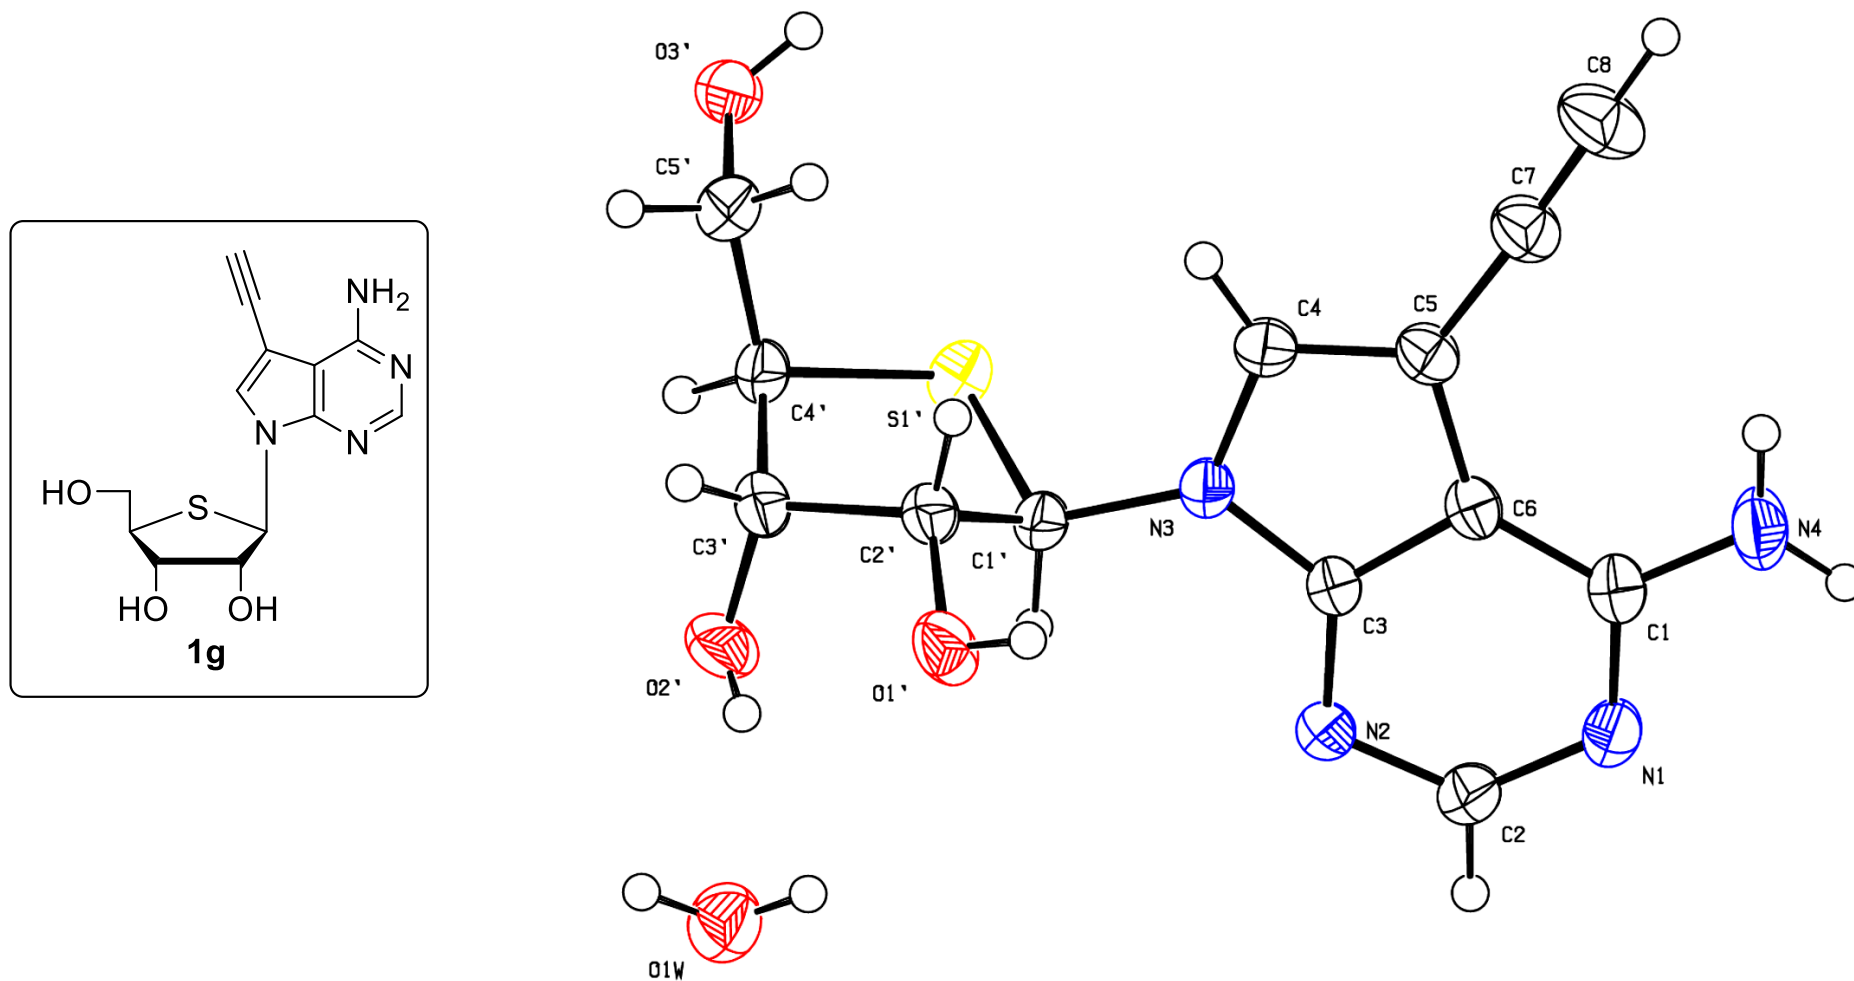

**Fig S1.** ORTEP diagram of compound **1g** showing thermal ellipsoid at 50% probability

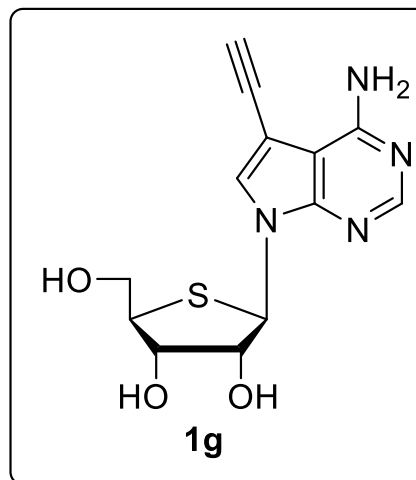

Crystal structure data for  $\text{C}_{13}\text{H}_{16}\text{N}_4\text{O}_4\text{S}$  (**1g**),  $M_r = 324.36$ , triclinic, space group P1 (no. 1),  $a = 5.31660(10)$  Å,  $b = 7.5604(2)$  Å,  $c = 10.2329(2)$  Å,  $V = 362.147(15)$  Å<sup>3</sup>,  $Z = 1$ ,  $T = 294.8(2)$  K,  $\rho_{\text{calc}} = 1.487$  g cm<sup>-3</sup>,  $F(000) = 170.0$ , crystal dimension  $0.227 \times 0.1 \times 0.049$  mm<sup>3</sup>,  $\mu(\text{CuK}\alpha) = 2.225$  mm<sup>-1</sup>, CuK $\alpha$  radiation ( $\lambda = 1.54184$  Å). Of 18922 reflections collected in the  $2\theta$  range from 9.19 to 134.13° using an  $\omega$  scan on a SuperNova, Dual, Cu at zero, AtlasS2 diffractometer, 2460 were unique reflections ( $R_{\text{int}} = 0.0230$ ,  $R_{\text{sigma}} = 0.0141$ ). Using Olex2, the structure was solved with the ShelXT structure solution program using Intrinsic Phasing and refined with the ShelXL refinement package using Least Squares minimization.  $wR_2 = 0.0658$ ,  $R_1 = 0.0239$ , GOF = 1.102, and max/min residual electron density 0.13/-0.14 e Å<sup>-3</sup>. Flack  $x$  parameter = -0.002 (9). Further details of the crystal structure investigation(s) may be obtained from the Cambridge Crystallographic Data Centre (CCDC), 12 Union Road, Cambridge, CB2 1EZ (UK); Tel: (+44)1223-336-408, Fax: (+44)1223-336-033, e-mail: deposit@ccdc.cam.ac.uk) on quoting the depository no. **CCDC 1575257**.

# Conformational analysis of the sugar ring in compound 1g

| v0    | v1    | v2     | v3    | v4    | P      | vmax  | $\chi$ | $\gamma$ | TYPE          |
|-------|-------|--------|-------|-------|--------|-------|--------|----------|---------------|
| -19.0 | 42.05 | -50.83 | 35.38 | -9.11 | 173.96 | 51.11 | -118.3 | -179.12  | PUR, C2'-endo |

Definition of parameters:

v0-v4 - Dihedral angles

P - Pseudorotation phase angle

PUR - Purine type base ( $\chi$ : S1'-C1'-N3-C3)

$\gamma$  - O3'-C5'-C4'-C3'

Pseudorotational angle P = 174.0°

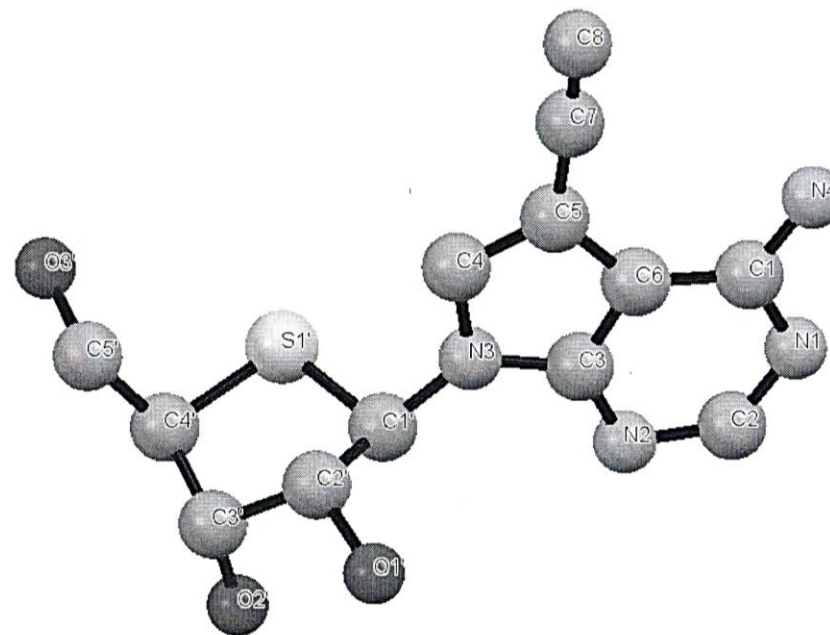

# HPLC purity data of 1a

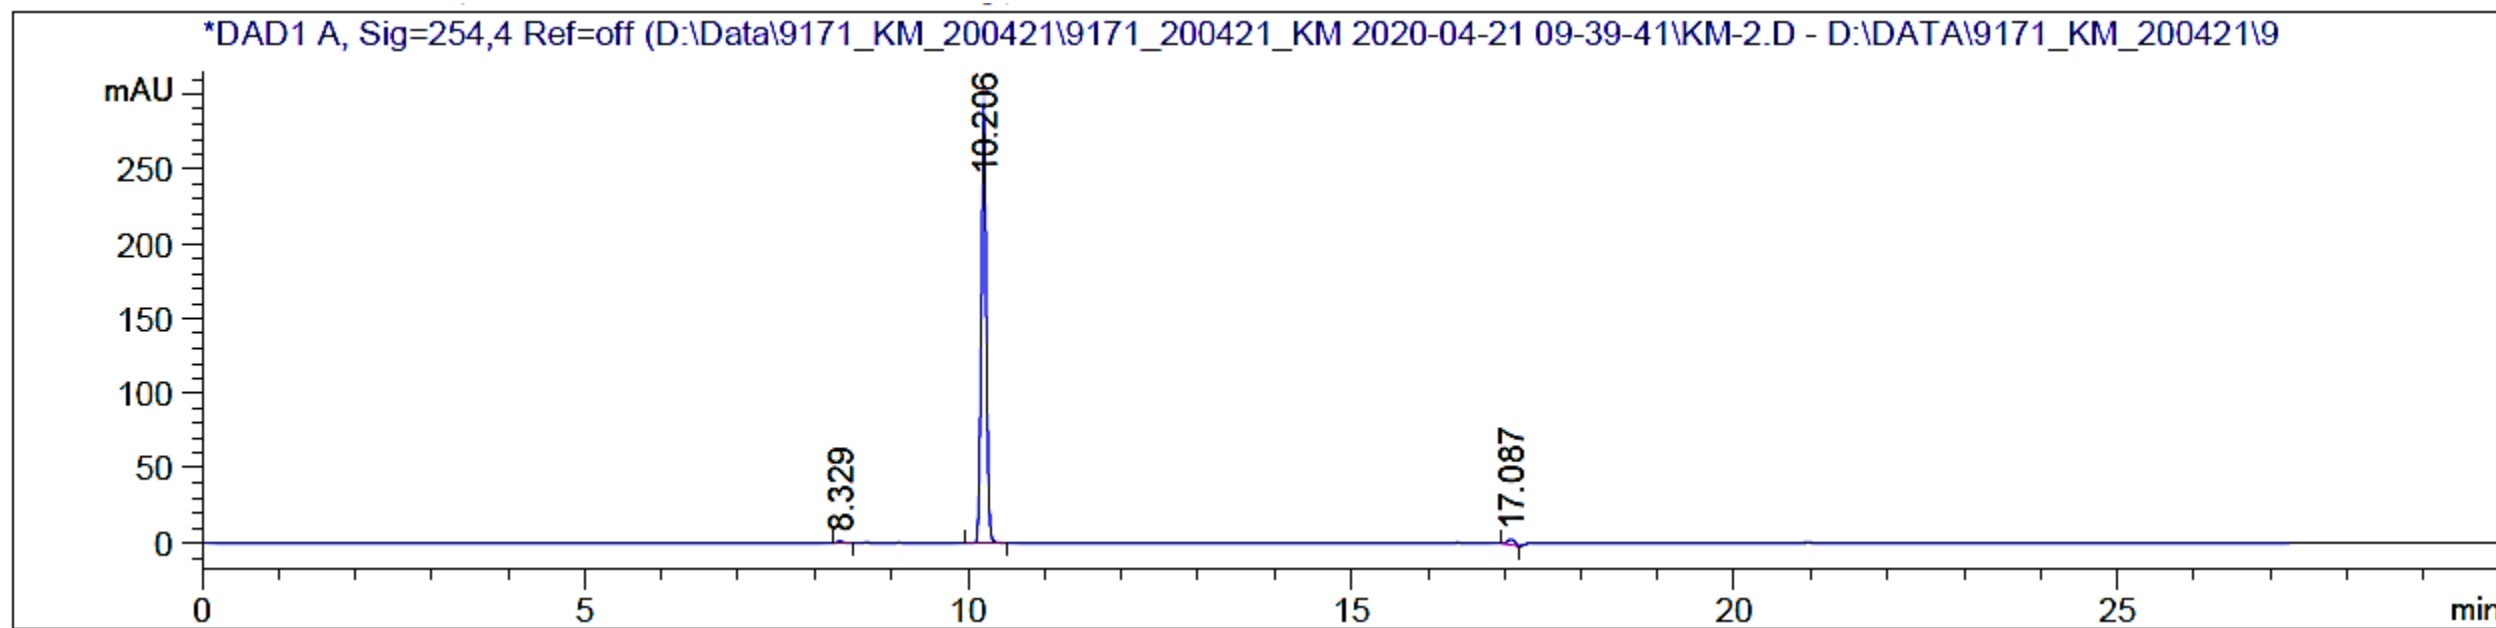

| Peak #   | RetTime [min] | Type | Width [min] | Area [mAU*s] | Height [mAU] | Area %  |
|----------|---------------|------|-------------|--------------|--------------|---------|
| 1        | 8.329         | BB   | 0.0737      | 6.60799      | 1.38433      | 0.4607  |
| 2        | 10.206        | BB   | 0.0726      | 1404.34875   | 300.04871    | 97.9183 |
| 3        | 17.087        | BB   | 0.1039      | 23.24776     | 3.57208      | 1.6210  |
| Totals : |               |      |             | 1434.20451   | 305.00512    |         |

# HPLC purity data of 1b

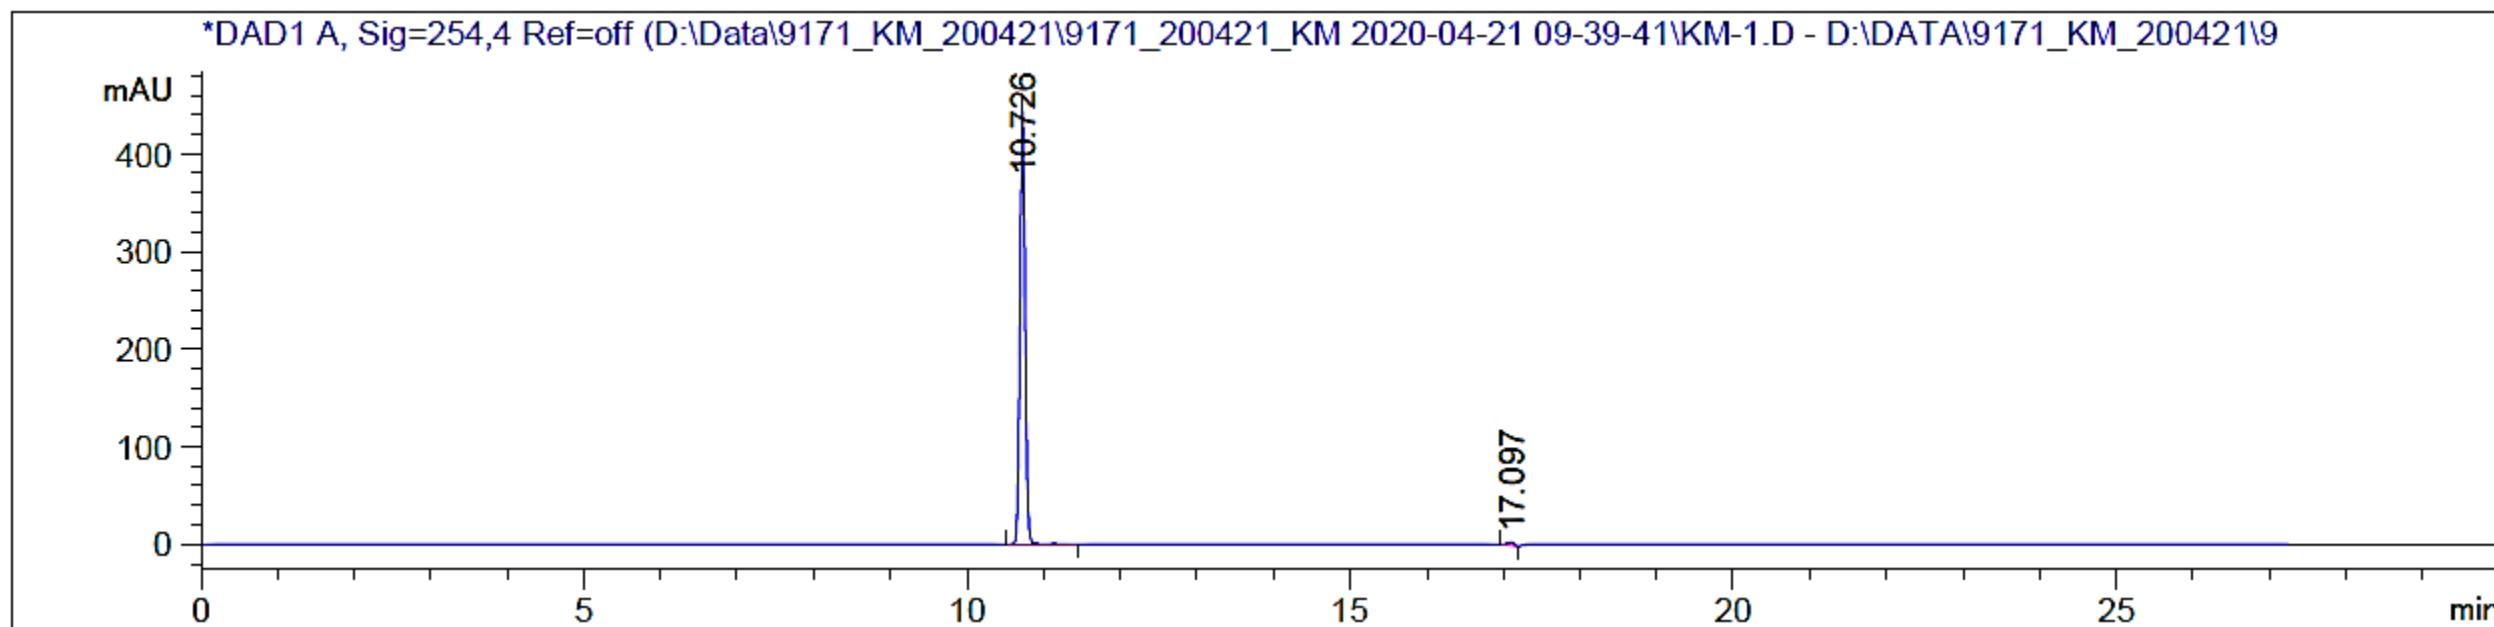

| Peak<br># | RetTime<br>[min] | Type | Width<br>[min] | Area<br>[mAU*s] | Height<br>[mAU] | Area<br>% |
|-----------|------------------|------|----------------|-----------------|-----------------|-----------|
| 1         | 10.726           | BV R | 0.0736         | 2195.87183      | 461.01913       | 98.9904   |
| 2         | 17.097           | BB   | 0.1019         | 22.39597        | 3.53589         | 1.0096    |

Totals : 2218.26780 464.55502

## HPLC purity data of 1c

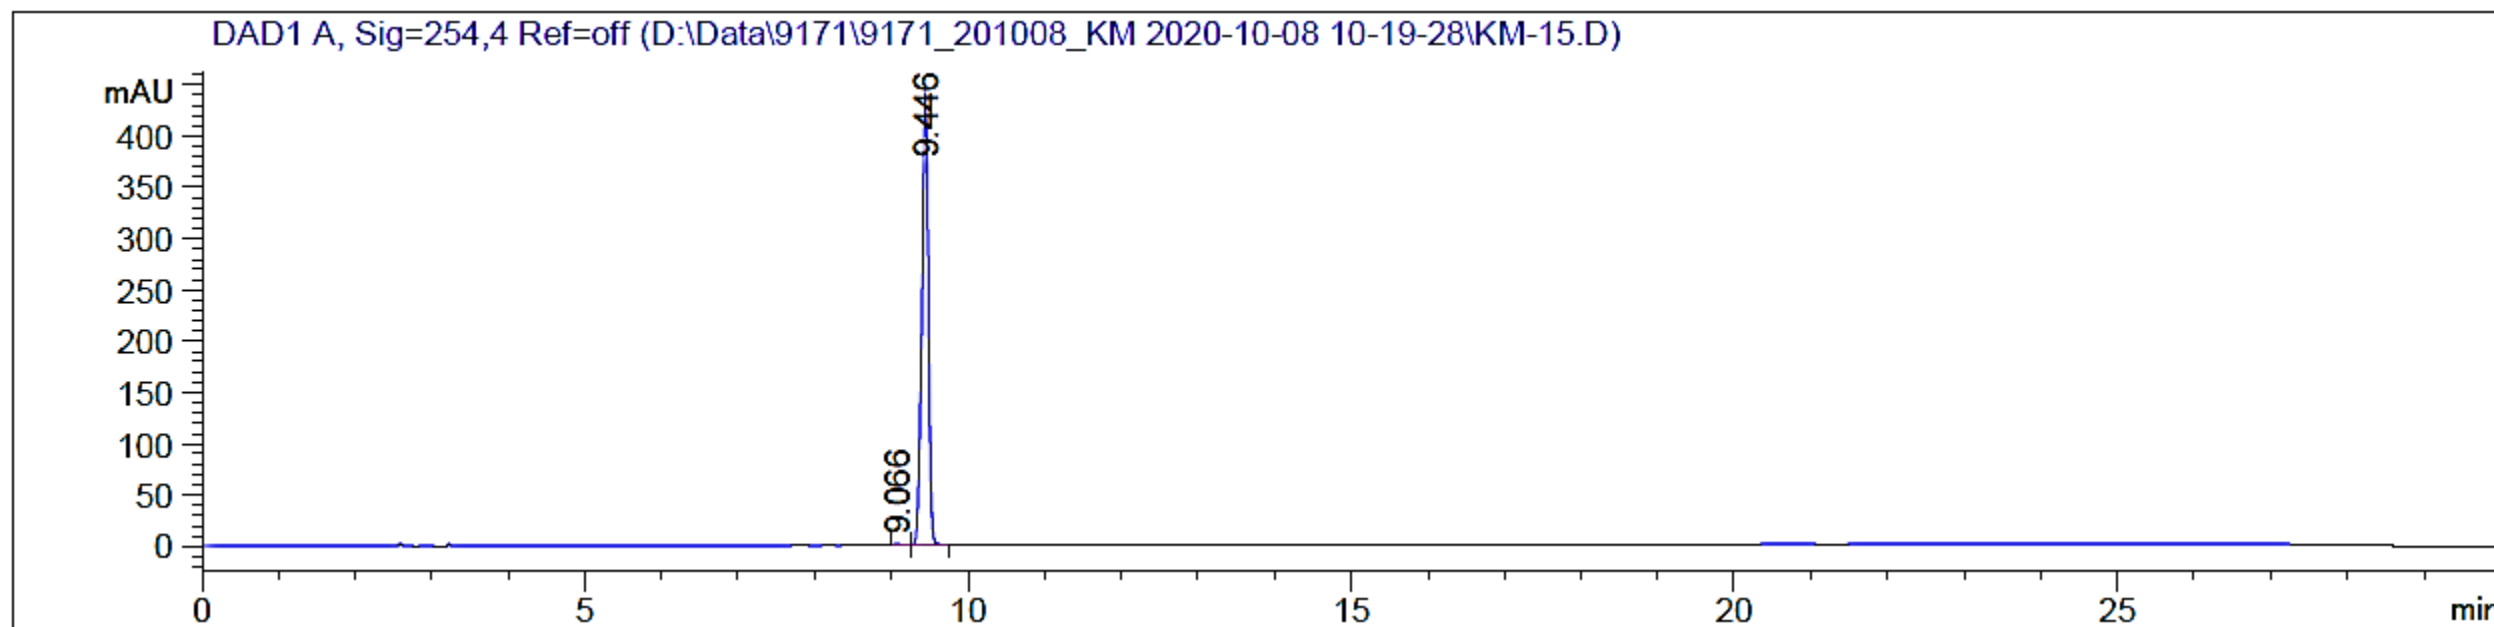

| Peak # | RetTime [min] | Type | Width [min] | Area [mAU*s] | Height [mAU] | Area %  |
|--------|---------------|------|-------------|--------------|--------------|---------|
| 1      | 9.066         | BB   | 0.0708      | 6.64823      | 1.46846      | 0.2508  |
| 2      | 9.446         | BB   | 0.0902      | 2643.77856   | 439.59253    | 99.7492 |

Totals : 2650.42679 441.06099

# HPLC purity data of 1d

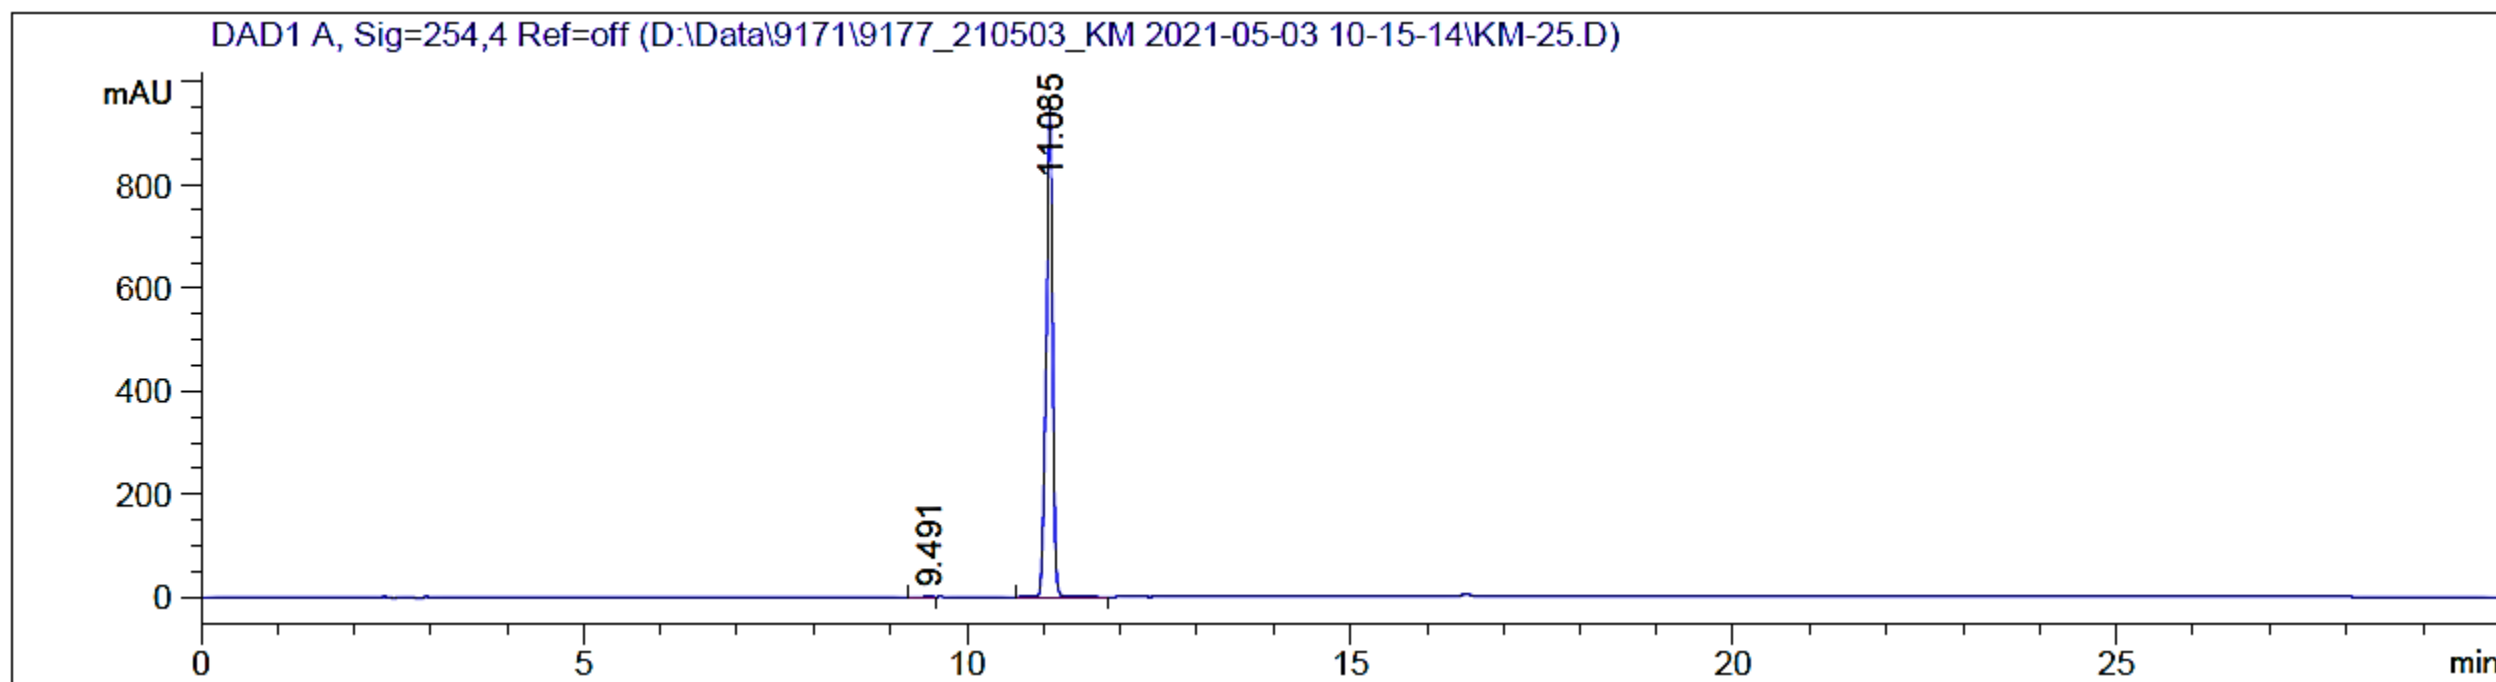

| Peak #   | RetTime [min] | Type | Width [min] | Area [mAU*s] | Height [mAU] | Area %  |
|----------|---------------|------|-------------|--------------|--------------|---------|
| 1        | 9.491         | BV   | 0.0913      | 12.72995     | 2.02748      | 0.2218  |
| 2        | 11.085        | BB   | 0.0890      | 5726.36230   | 967.73749    | 99.7782 |
| Totals : |               |      |             | 5739.09226   | 969.76497    |         |

## HPLC purity data of 1e

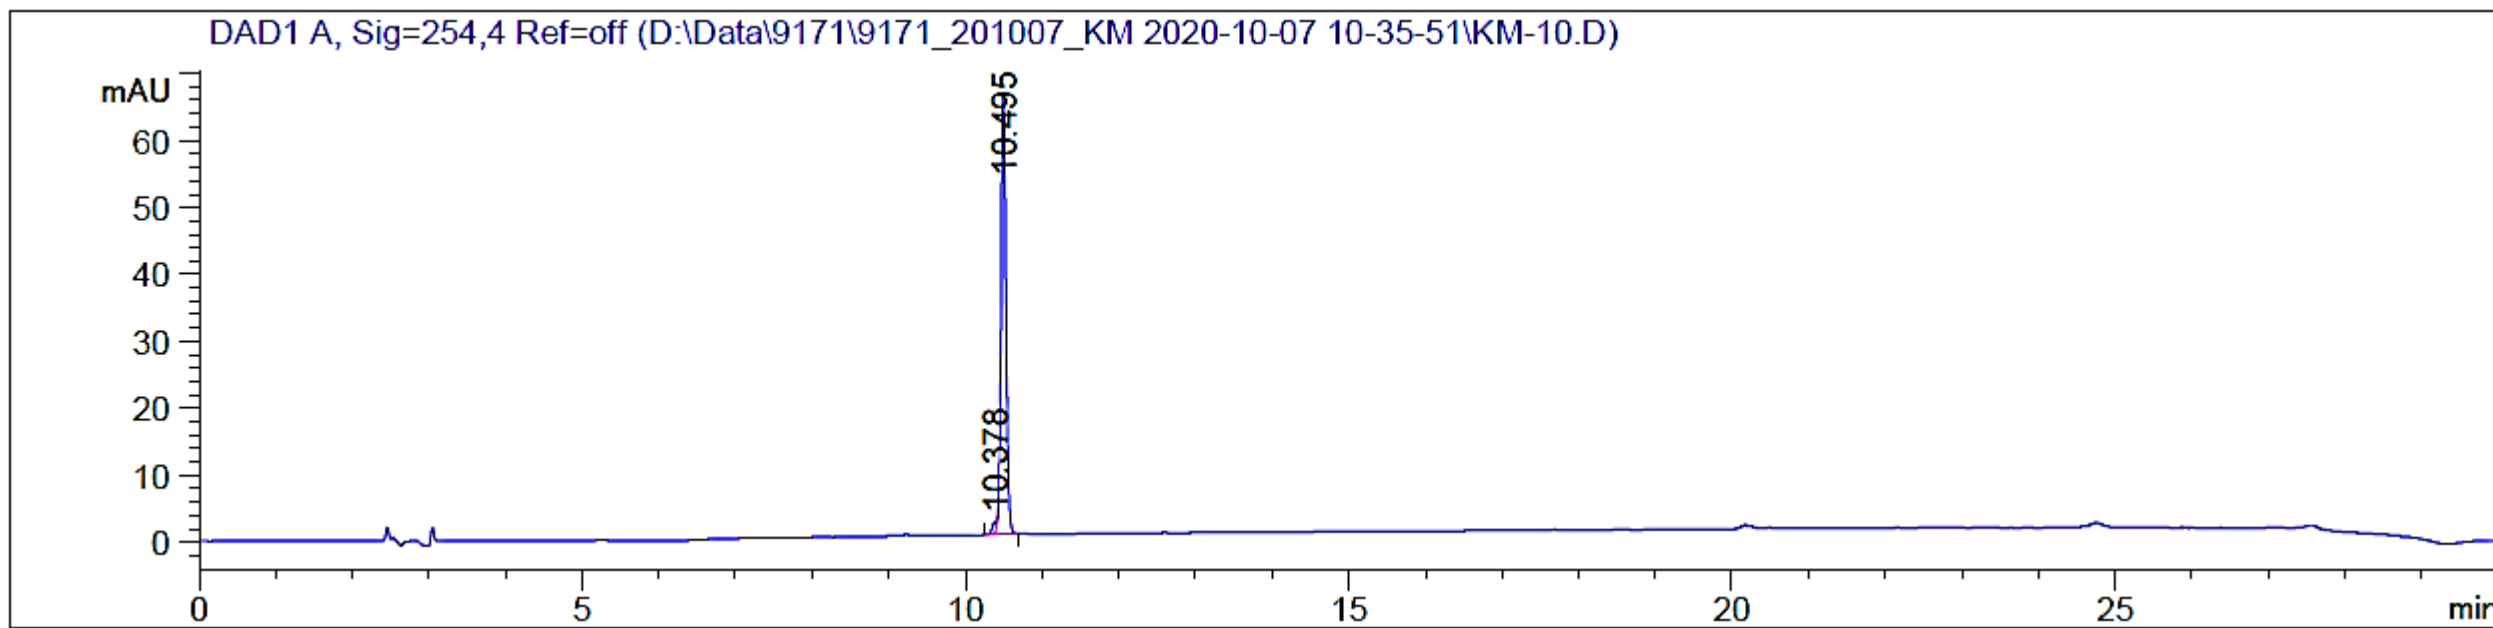

| Peak #   | RetTime [min] | Type | Width [min] | Area [mAU*s] | Height [mAU] | Area %  |
|----------|---------------|------|-------------|--------------|--------------|---------|
| 1        | 10.378        | BV E | 0.0561      | 6.35986      | 1.68225      | 2.0317  |
| 2        | 10.495        | VB R | 0.0701      | 306.66940    | 66.09574     | 97.9683 |
| Totals : |               |      |             | 313.02926    | 67.77799     |         |



# HPLC purity data of 1f

\*DAD1 A, Sig=254,4 Ref=off (D:\Data\9171\_KM\_200421\9171\_200421\_KM 2020-04-21 09-39-41\KM-4.D - D:\DATA\9171\_KM\_200421\9

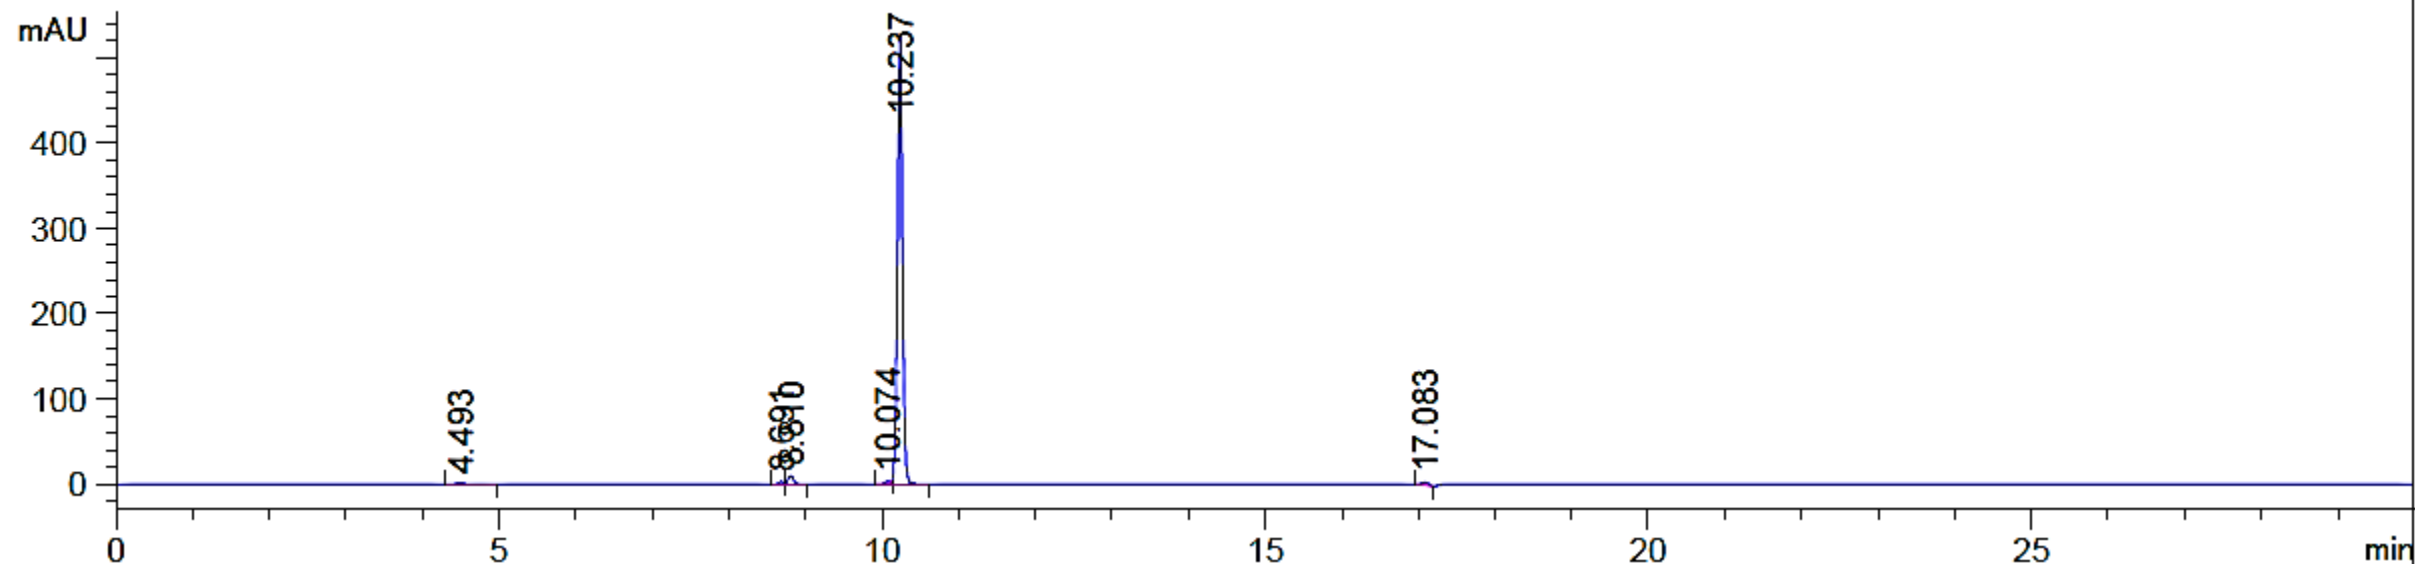

| Peak # | RetTime [min] | Type | Width [min] | Area [mAU*s] | Height [mAU] | Area %  |
|--------|---------------|------|-------------|--------------|--------------|---------|
| 1      | 4.493         | BB   | 0.1257      | 10.35117     | 1.28913      | 0.3912  |
| 2      | 8.691         | BV   | 0.0705      | 15.31487     | 3.27851      | 0.5788  |
| 3      | 8.810         | VB   | 0.0759      | 51.18538     | 10.30826     | 1.9343  |
| 4      | 10.074        | BV E | 0.0656      | 15.44302     | 3.63367      | 0.5836  |
| 5      | 10.237        | VB R | 0.0739      | 2530.55591   | 527.73730    | 95.6304 |
| 6      | 17.083        | BB   | 0.1066      | 23.33294     | 3.55428      | 0.8818  |

Totals : 2646.18329 549.80114

# HPLC purity data of 1g

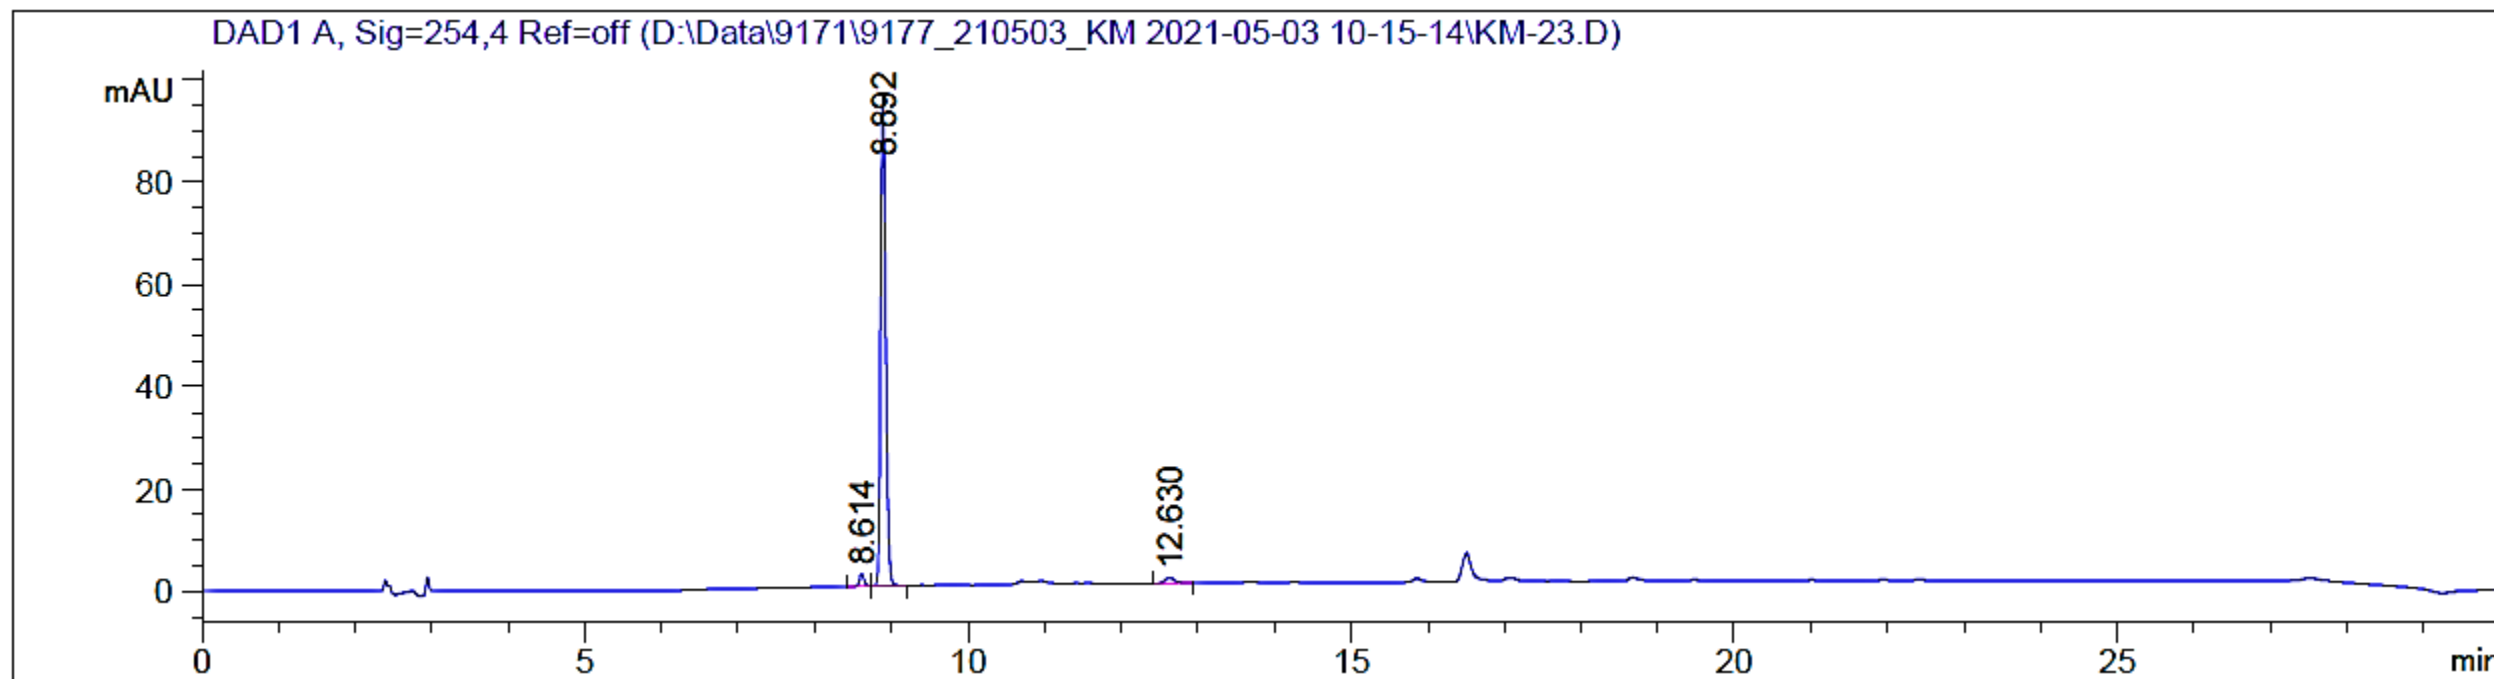

| Peak # | RetTime [min] | Type | Width [min] | Area [mAU*s] | Height [mAU] | Area %  |
|--------|---------------|------|-------------|--------------|--------------|---------|
| 1      | 8.614         | BB   | 0.0699      | 10.65508     | 2.39596      | 2.3159  |
| 2      | 8.892         | BB   | 0.0715      | 438.71045    | 95.74940     | 95.3525 |
| 3      | 12.630        | BB   | 0.1651      | 10.72762     | 1.01638      | 2.3316  |

Totals : 460.09315 99.16173

# HPLC purity data of 1h

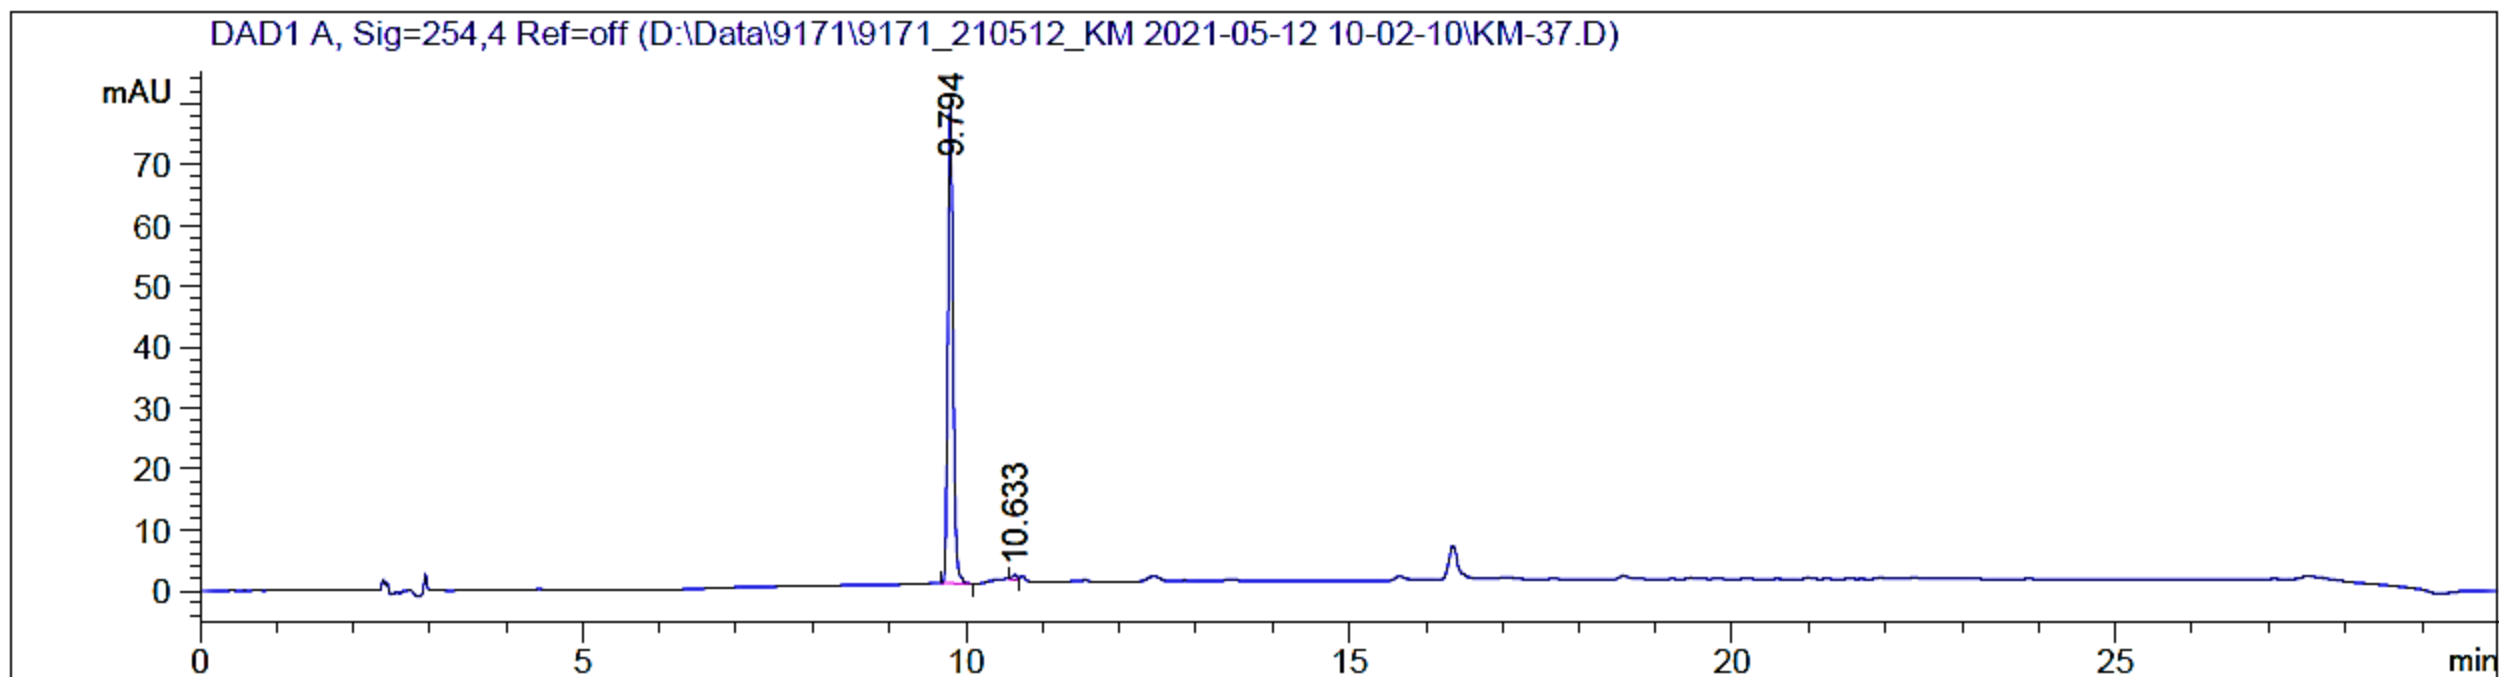

| Peak # | RetTime [min] | Type | Width [min] | Area [mAU*s] | Height [mAU] | Area %  |
|--------|---------------|------|-------------|--------------|--------------|---------|
| 1      | 9.794         | BB   | 0.0690      | 364.31149    | 80.18752     | 98.9838 |
| 2      | 10.633        | BV   | 0.0692      | 3.74005      | 8.20275e-1   | 1.0162  |

Totals : 368.05154 81.00780

# HPLC purity data of 1i

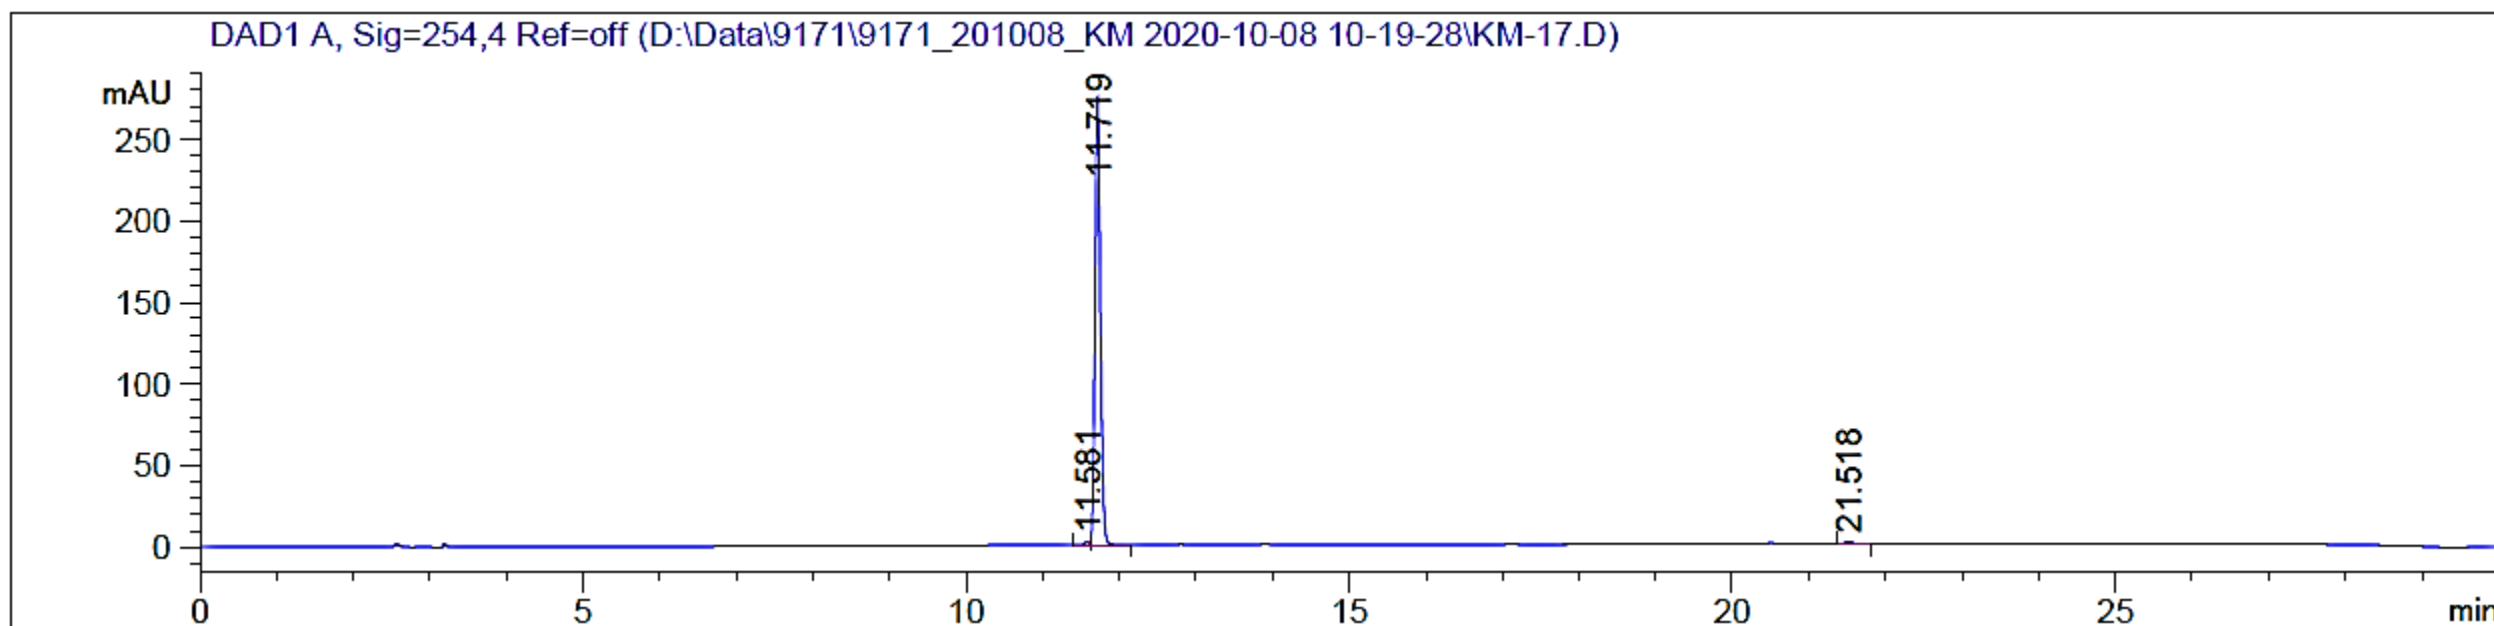

| Peak # | RetTime [min] | Type | Width [min] | Area [mAU*s] | Height [mAU] | Area %  |
|--------|---------------|------|-------------|--------------|--------------|---------|
| 1      | 11.581        | BV E | 0.0600      | 7.97739      | 2.02500      | 0.6025  |
| 2      | 11.719        | VB R | 0.0713      | 1306.85962   | 275.95297    | 98.6961 |
| 3      | 21.518        | BB   | 0.0928      | 9.28758      | 1.53137      | 0.7014  |

Totals : 1324.12458 279.50934

# HPLC purity data of 1j

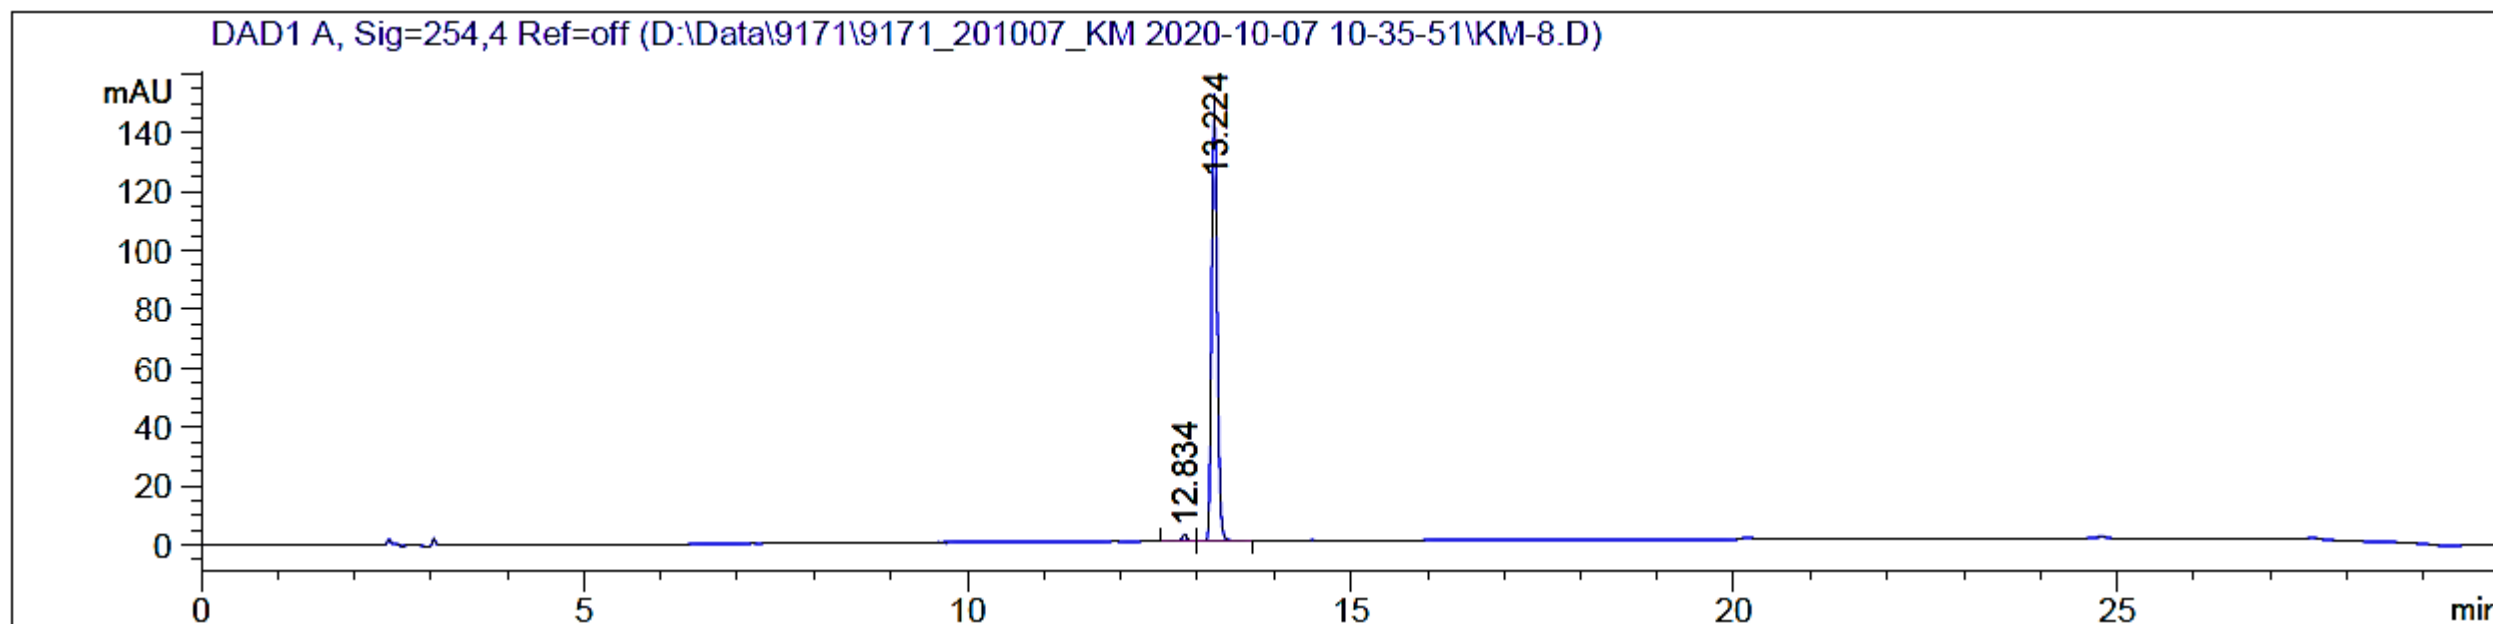

| Peak #   | RetTime [min] | Type | Width [min] | Area [mAU*s] | Height [mAU] | Area %  |
|----------|---------------|------|-------------|--------------|--------------|---------|
| 1        | 12.834        | BB   | 0.0756      | 10.97668     | 2.22396      | 1.4582  |
| 2        | 13.224        | BB   | 0.0769      | 741.76349    | 152.00572    | 98.5418 |
| Totals : |               |      |             | 752.74017    | 154.22968    |         |

## HPLC purity data of 1k

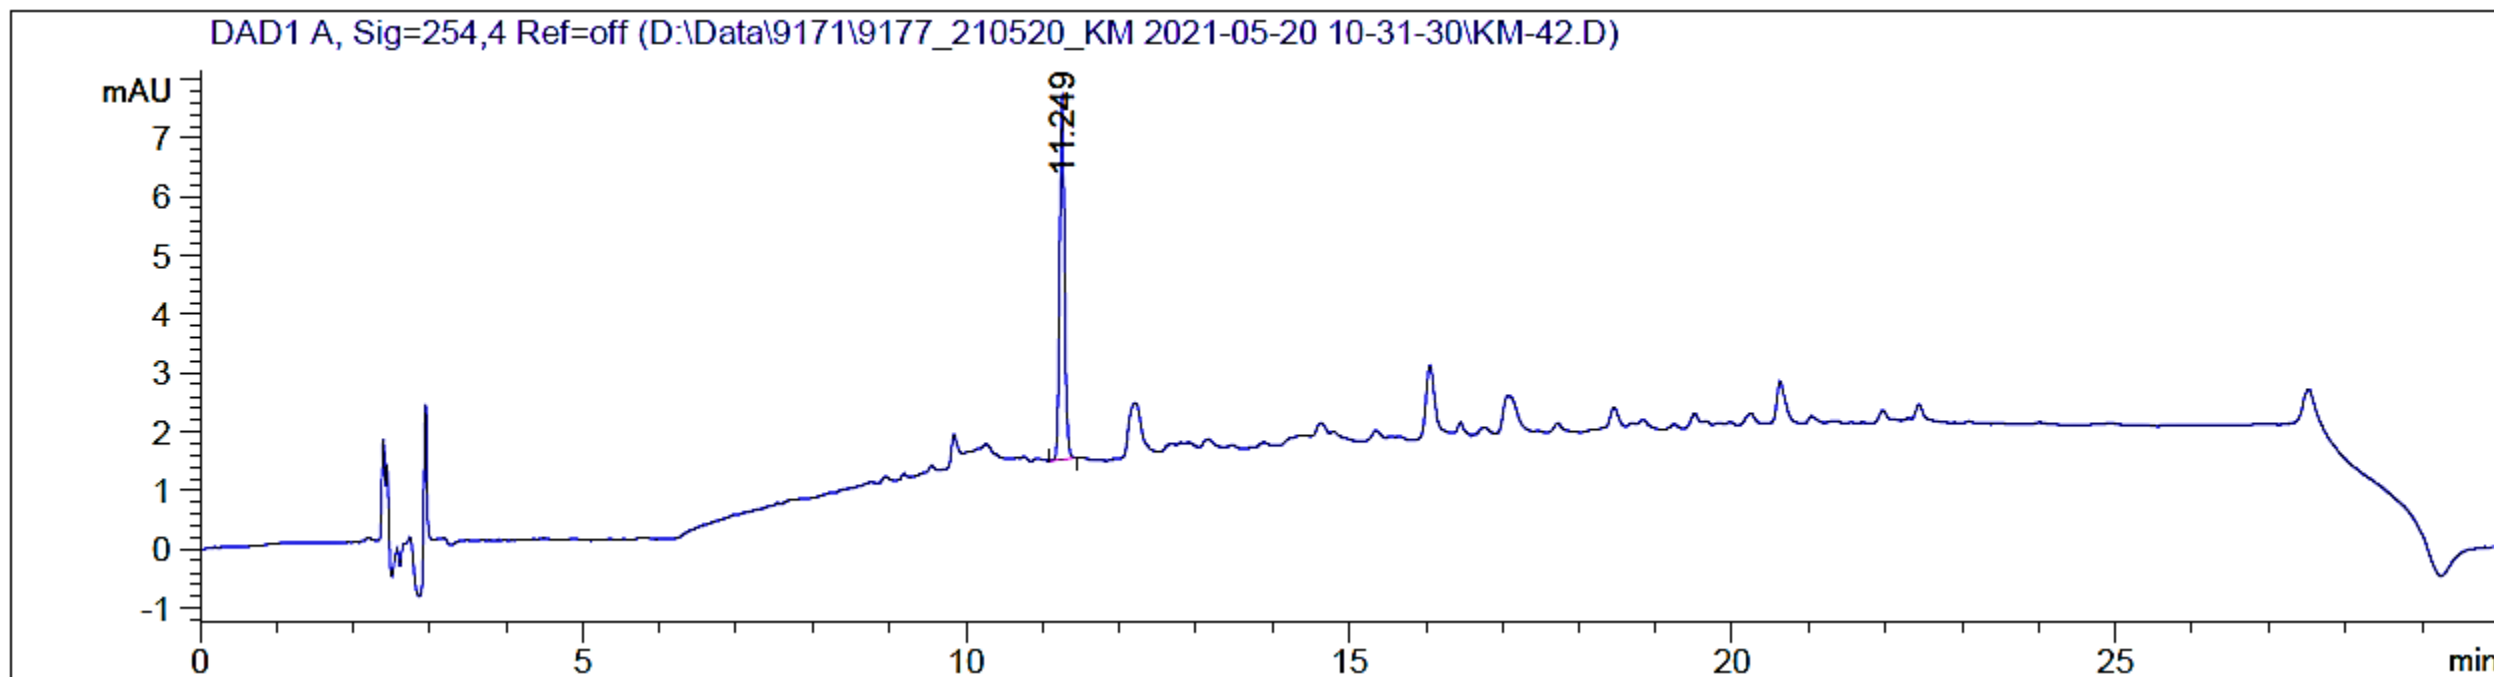

| Peak<br># | RetTime<br>[min] | Type | Width<br>[min] | Area<br>[mAU*s] | Height<br>[mAU] | Area<br>% |
|-----------|------------------|------|----------------|-----------------|-----------------|-----------|
| 1         | 11.249           | BB   | 0.0696         | 28.49407        | 6.19632         | 100.0000  |

Totals : 28.49407 6.19632

**Table S1. Kinome scan data of compound 1g at 1000 nM<sup>a</sup>**

| <b>DiscoverX Gene Symbol</b> | <b>Entrez Gene Symbol</b> | <b>Compound 1g<br/>(% inhibition)</b> |
|------------------------------|---------------------------|---------------------------------------|
| ABL1(E255K)-phosphorylated   | ABL1                      | 18.0                                  |
| ABL1(T315I)-phosphorylated   | ABL1                      | 65.0                                  |
| ABL1-nonphosphorylated       | ABL1                      | 39.0                                  |
| ABL1-phosphorylated          | ABL1                      | 35.0                                  |
| ACVR1B                       | ACVR1B                    | 29.0                                  |
| ADCK3                        | CABC1                     | 8.0                                   |
| AKT1                         | AKT1                      | 7.0                                   |
| AKT2                         | AKT2                      | 4.0                                   |
| ALK                          | ALK                       | 31.0                                  |
| AURKA                        | AURKA                     | 22.0                                  |
| AURKB                        | AURKB                     | 0.0                                   |
| AXL                          | AXL                       | 7.0                                   |
| BMPR2                        | BMPR2                     | 1.0                                   |
| BRAF                         | BRAF                      | 0.0                                   |
| BRAF(V600E)                  | BRAF                      | 0.0                                   |
| BTK                          | BTK                       | 0.0                                   |
| CDK11                        | CDK19                     | 72.1                                  |
| CDK2                         | CDK2                      | 9.0                                   |
| CDK3                         | CDK3                      | 18.0                                  |
| CDK7                         | CDK7                      | 52.3                                  |
| CDK9                         | CDK9                      | 4.0                                   |
| CHEK1                        | CHEK1                     | 0.0                                   |
| CSF1R                        | CSF1R                     | 20.0                                  |

|                           |         |      |
|---------------------------|---------|------|
| CSNK1D                    | CSNK1D  | 91.3 |
| CSNK1G2                   | CSNK1G2 | 54.0 |
| DCAMKL1                   | DCLK1   | 6.0  |
| DYRK1B                    | DYRK1B  | 83.0 |
| EGFR                      | EGFR    | 0.0  |
| EGFR(L858R)               | EGFR    | 0.0  |
| EPHA2                     | EPHA2   | 28.0 |
| ERBB2                     | ERBB2   | 15.0 |
| ERBB4                     | ERBB4   | 3.0  |
| ERK1                      | MAPK3   | 4.0  |
| FAK                       | PTK2    | 0.0  |
| FGFR2                     | FGFR2   | 12.0 |
| FGFR3                     | FGFR3   | 10.0 |
| FLT3                      | FLT3    | 27.0 |
| GSK3B                     | GSK3B   | 0.0  |
| IGF1R                     | IGF1R   | 7.0  |
| IKK-alpha                 | CHUK    | 10.0 |
| IKK-beta                  | IKBKB   | 0.0  |
| INSR                      | INSR    | 5.0  |
| JAK2(JH1domain-catalytic) | JAK2    | 35.0 |
| JAK3(JH1domain-catalytic) | JAK3    | 0.0  |
| JNK1                      | MAPK8   | 17.0 |
| JNK2                      | MAPK9   | 0.0  |
| JNK3                      | MAPK10  | 13.0 |



|                  |          |      |
|------------------|----------|------|
| KIT              | KIT      | 1.0  |
| KIT(D816V)       | KIT      | 22.0 |
| KIT(V559D,T670I) | KIT      | 17.0 |
| LKB1             | STK11    | 2.0  |
| MAP3K4           | MAP3K4   | 29.0 |
| MAPKAPK2         | MAPKAPK2 | 0.0  |
| MARK3            | MARK3    | 0.0  |
| MEK1             | MAP2K1   | 74.0 |
| MEK2             | MAP2K2   | 69.0 |
| MET              | MET      | 4.0  |
| MKNK1            | MKNK1    | 0.0  |
| MKNK2            | MKNK2    | 62.0 |
| MLK1             | MAP3K9   | 7.0  |
| p38-alpha        | MAPK14   | 11.0 |
| p38-beta         | MAPK11   | 3.0  |
| PAK1             | PAK1     | 18.0 |
| PAK2             | PAK2     | 44.0 |
| PAK4             | PAK4     | 50.0 |
| PCTK1            | CDK16    | 0.0  |
| PDGFRA           | PDGFRA   | 0.0  |
| PDGFRB           | PDGFRB   | 8.0  |
| PDPK1            | PDPK1    | 11.0 |
| PIK3C2B          | PIK3C2B  | 1.0  |
| PIK3CA           | PIK3CA   | 7.0  |

|                            |         |      |
|----------------------------|---------|------|
| PIK3CG                     | PIK3CG  | 0.0  |
| PIM1                       | PIM1    | 37.0 |
| PIM2                       | PIM2    | 3.0  |
| PIM3                       | PIM3    | 25.0 |
| PKAC-alpha                 | PRKACA  | 11.0 |
| PLK1                       | PLK1    | 0.0  |
| PLK3                       | PLK3    | 0.0  |
| PLK4                       | PLK4    | 0.0  |
| PRKCE                      | PRKCE   | 0.0  |
| RAF1                       | RAF1    | 8.0  |
| RET                        | RET     | 11.0 |
| RIOK2                      | RIOK2   | 0.0  |
| ROCK2                      | ROCK2   | 27.0 |
| RSK2(Kin.Dom.1-N-terminal) | RPS6KA3 | 55.0 |
| SNARK                      | NUAK2   | 0.0  |
| SRC                        | SRC     | 6.0  |
| SRPK3                      | SRPK3   | 6.0  |
| TGFBR1                     | TGFBR1  | 11.0 |
| TIE2                       | TEK     | 6.0  |
| TRKA (NTRK1)               | NTRK1   | 95.1 |
| TSSK1B                     | TSSK1B  | 16.0 |
| TYK2(JH1domain-catalytic)  | TYK2    | 70.0 |
| ULK2                       | ULK2    | 0.0  |
| VEGFR2                     | KDR     | 30.0 |
| ZAP70                      | STK32C  | 0.0  |

<sup>a</sup>Compound **1g** was screened at 1000 nM against 96 kinases using DiscoverX Kinome Scan. The results for binding interactions are reported as % inhibition, where higher values indicate strong affinity.

**Table S2. Kinase inhibition profile of 1a-k against TRKA, CK1δ, and DYRK1A/1B**

| Compound no.              | IC <sub>50</sub> (K <sub>i</sub> ) (nM) <sup>a</sup> |               |               |               |
|---------------------------|------------------------------------------------------|---------------|---------------|---------------|
|                           | TRKA                                                 | CK1δ          | DYRK1A        | DYRK1B        |
| <b>1a</b>                 | 37 (74)                                              | 123 (123)     | 15 (30)       | 14 (14)       |
| <b>1b</b>                 | 11 (22)                                              | 18 918)       | 166 (332)     | 117 (117)     |
| <b>1c</b>                 | 474 (948)                                            | 77 (77)       | 112 (224)     | 86 (86)       |
| <b>1d</b>                 | 157 (314)                                            | 27 (27)       | 357 (714)     | 288 (288)     |
| <b>1e</b>                 | > 10,000                                             | > 10,000      | > 10,000      | > 10,000      |
| <b>1f</b>                 | > 10,000                                             | 910 (910)     | > 10,000      | > 10,000      |
| <b>1g</b>                 | 148 (296)                                            | 80 (80)       | 43 (86)       | 33 (33)       |
| <b>1h</b>                 | 293 (586)                                            | 970 (970)     | 1,255 (2,510) | 1,069 (1,069) |
| <b>1i</b>                 | 573 (1,146)                                          | 430 (430)     | 2,981 (5,962) | 1,343 (1,343) |
| <b>1j</b>                 | 958 (786)                                            | 1,321 (1,321) | > 10,000      | > 10,000      |
| <b>1k</b>                 | 393 (354)                                            | 1,782 (1,782) | > 10,000      | > 10,000      |
| GNF 5837 <sup>b</sup>     | 177                                                  | > 10,000      | > 10,000      | > 10,000      |
| AZ Dyrk1B 33 <sup>c</sup> | > 10,000                                             | > 10,000      | 14 (28)       | 50 (50)       |
| Harmine <sup>d</sup>      | > 10,000                                             | > 10,000      | 66 9132)      | 85 (85)       |
| LH 846 <sup>e</sup>       | > 10,000                                             | 80            | > 10,000      | > 10,000      |
| TC-S 7004 <sup>f</sup>    | > 10,000                                             | > 10,000      | < 10          | 22 (22)       |

<sup>a</sup> IC<sub>50</sub> values were determined using an 11-point 3-fold serial dilution of each test compound and K<sub>i</sub> was determined by Cheng-Prusoff equation; <sup>b</sup> Selective pan-TRK inhibitor; <sup>c</sup> Selective Dyrk1B kinase inhibitor; <sup>d</sup> DYRK1A kinase inhibitor; <sup>e</sup> potent inhibitor of CK1δ; <sup>f</sup> Potent and selective DYRK1A/B inhibitor.
